# Supplementary material for: Triapine Analogues and Their Copper(II) Complexes: Synthesis, Characterization, Solution Speciation, Redox Activity, Cytotoxicity, and mR2 RNR Inhibition
Source: PubMed Central journal article supplement (PMC8335727; doi:10.1021/acs.inorgchem.1c01275), 2021-07-19
Supplement: ic1c01275_si_001.pdf [file ic1c01275_si_001.pdf]

**Supporting Information**  
**for**  
**Triapine analogues and their copper(II) complexes: synthesis,**  
**characterization, solution speciation, redox activity, cytotoxicity and mR2**  
**RNR inhibition**

Iuliana Besleaga,<sup>∇</sup> Iryna Stepanenko,<sup>∇</sup> Tatsiana V. Petrasheuskaya,<sup>‡,‡</sup> Denisa Darvasiova,<sup>†</sup>  
Martin Breza,<sup>†</sup> Marta Hammerstad,<sup>◊</sup> Małgorzata A. Marć,<sup>‡,#</sup> Alexander Prado-Roller,<sup>∇</sup> Gabriella  
Spengler,<sup>‡,‡</sup> Ana Popović-Bijelić,<sup>⊥</sup> Eva A. Enyedy,<sup>‡,‡,\*</sup> Peter Rapta,<sup>†,\*</sup> Anatoly D. Shutalev,<sup>△,\*</sup>  
Vladimir B. Arion<sup>∇,\*</sup>

<sup>∇</sup>*University of Vienna, Institute of Inorganic Chemistry, Währinger Strasse 42, A-1090 Vienna, Austria*

<sup>‡</sup>*Department of Inorganic and Analytical Chemistry, Interdisciplinary Excellence Centre, University of Szeged, Dóm tér 7, H-6720 Szeged, Hungary*

<sup>‡</sup>*MTA-SZTE Lendület Functional Metal Complexes Research Group, University of Szeged, Dóm tér 7, H-6720 Szeged, Hungary*

<sup>†</sup>*Institute of Physical Chemistry and Chemical Physics, Faculty of Chemical and Food Technology, Slovak University of Technology in Bratislava, Radlinského 9, SK-81237 Bratislava, Slovak Republic*

<sup>#</sup>*Department of Medical Microbiology, Albert Szent-Györgyi Health Center and Faculty of Medicine, University of Szeged, Semmelweis utca 6, 6725-Szeged, Hungary*

<sup>⊥</sup>*Faculty of Physical Chemistry, University of Belgrade, Studentski trg 12-16, 11158 Belgrade, Serbia*

<sup>△</sup>*N. D. Zelinsky Institute of Organic Chemistry, Russian Academy of Sciences, 47 Leninsky Ave., 119991 Moscow, Russian Federation*

## Table of Contents

|        |                                                                                                                                                          |     |
|--------|----------------------------------------------------------------------------------------------------------------------------------------------------------|-----|
| 1.     | Experimental details                                                                                                                                     | S3  |
| 1.1.   | Synthesis of oxidized thiosemicarbazones                                                                                                                 | S3  |
| 1.2.   | Synthesis of copper(II) complexes with oxidized ligands                                                                                                  | S6  |
| 2.     | Characterization of the compounds                                                                                                                        | S7  |
| 2.1.   | Physical measurements                                                                                                                                    | S7  |
| 2.2.   | Crystallographic Structure Determination                                                                                                                 | S7  |
| 2.3.   | Spectroscopic studies: UV–vis titrations, kinetic measurements and lipophilicity determination                                                           | S8  |
| 2.4.   | Spectroelectrochemical studies                                                                                                                           | S9  |
| 2.5.   | <i>In vitro</i> cell studies                                                                                                                             | S10 |
| 2.5.1. | Cell lines and culture conditions                                                                                                                        | S10 |
| 2.5.2. | MTT assays                                                                                                                                               | S10 |
| 2.5.3. | Mechanisms of cell death: assay for apoptosis induction                                                                                                  | S11 |
| 2.6.   | Tyrosyl radical reduction in mouse R2 RNR protein                                                                                                        | S11 |
| 2.7.   | Computational details                                                                                                                                    | S12 |
| 3.     | Schemes for assignment of resonances in HL <sup>1</sup> – HL <sup>3</sup> and their isomers (Scheme S1-S2)                                               | S12 |
| 4.     | Oxidative cyclization in the presence of Ag <sub>2</sub> O (Scheme S3)                                                                                   | S13 |
| 5.     | Schemes for assignment of resonances in HL <sup>1a'</sup> , HL <sup>1a''</sup> , HL <sup>2c'</sup> , HL <sup>2c''</sup> and their isomers (Scheme S4-S7) | S14 |
| 6.     | Oxidation of HL <sup>2</sup> with PBQ (Scheme S8)                                                                                                        | S16 |
| 7.     | Suggested structures for [Cu(L <sup>1</sup> )(H <sub>2</sub> O)] <sup>+</sup> and [Cu(HL <sup>1</sup> )(H <sub>2</sub> O)] <sup>2+</sup> (Chart S1)      | S17 |
| 8.     | Frontier orbitals in HL <sup>2</sup> (Figure S1)                                                                                                         | S18 |
| 9.     | ORTEP view of the ATSC (Figure S2)                                                                                                                       | S18 |
| 10.    | <i>E/Z</i> -isomerization of HL <sup>2c'</sup> (Figure S3-S5)                                                                                            | S19 |
| 11.    | ORTEP view of HL <sup>2e</sup> and [Cu(L <sup>1c</sup> )Cl] (4) (Figure S6-S7)                                                                           | S20 |
| 12.    | Spectroscopic data (Figure S8-S11)                                                                                                                       | S21 |
| 13.    | Spectroelectrochemical data (Figure S12-S13)                                                                                                             | S24 |
| 14.    | EPR measurement (Figure S14)                                                                                                                             | S26 |
| 15.    | Tyrosyl radical reduction kinetics in mouse R2 RNR protein (Figure S15)                                                                                  | S26 |
| 16.    | Cell cycle arrest (Figure S16-S17)                                                                                                                       | S27 |
| 17.    | Crystal Data and Details of Data Collection (Table S1-S3)                                                                                                | S29 |
| 18.    | <sup>1</sup> H and <sup>13</sup> C NMR Data (Table S4-S6)                                                                                                | S32 |
| 19.    | Complexation of HL <sup>1a'</sup> and HL <sup>1a''</sup> (Table S7)                                                                                      | S35 |
| 20.    | Cell apoptosis assay (Table S8-S9)                                                                                                                       | S36 |
| 21.    | Computational data                                                                                                                                       | S37 |
|        | References                                                                                                                                               | S73 |

## 1. Experimental details

### 1.1. Synthesis of oxidized thiosemicarbazones

#### N-(4-hydroxy-3,5-dimethylphenyl)-5-(pyridin-2-yl)-1,3,4-thiadiazol-2-amine

**(HL<sup>1a'</sup>·0.25H<sub>2</sub>O)**. To a suspension of **HL<sup>1</sup>·0.5H<sub>2</sub>O** (217 mg, 0.70 mmol) in methanol (10 mL) was added dropwise a solution of 2,3-dichloro-5,6-dicyano-1,4-benzoquinone (DDQ, 164 mg, 0.72 mmol) in methanol (10 mL). The reaction mixture was stirred at room temperature overnight. The yellow-greenish solid was filtered off, washed with methanol and dried in vacuo to give a first portion of material (108 mg). A second portion of the product (21 mg) was obtained from the filtrate by removal of the solvent and purification of the crude product by column chromatography on silica by using ethyl acetate as eluent. Second collected fraction with  $R_f = 0.8$  is **HL<sup>1a'</sup>**, while the first minor fraction with  $R_f = 0.93$  is **HL<sup>1a''</sup>**. Overall yield of **HL<sup>1a'</sup>·0.25H<sub>2</sub>O**: 129 mg, 60.9%. Anal. Calcd for C<sub>15</sub>H<sub>14</sub>N<sub>4</sub>OS·0.25H<sub>2</sub>O ( $M_r = 302.87$ ), %: C, 59.48; H, 4.83; N, 18.50; S, 10.5. Found, %: C, 59.41; H, 4.67; N, 18.35; S, 11.01. Positive ion ESI-MS for C<sub>15</sub>H<sub>14</sub>N<sub>4</sub>OS (MeCN/MeOH +1% H<sub>2</sub>O):  $m/z$  299.17 [HL<sup>1a'</sup>+H]<sup>+</sup>, 321.16 [HL<sup>1a'</sup>+Na]<sup>+</sup>, negative ion ESI-MS:  $m/z$  296.94 [HL<sup>1a'</sup>-H]<sup>-</sup>. <sup>1</sup>H NMR (500 MHz, DMSO-*d*<sub>6</sub>)  $\delta$  10.20 (s, 1H, H<sub>11</sub>), 8.61 (d,  $J = 4.4$  Hz, 1H, H<sub>6</sub>), 8.11 (d,  $J = 7.9$  Hz, 1H, H<sub>3</sub>), 8.08 (s, 1H, H<sub>18</sub>), 7.95 (td,  $J = 7.7, 1.7$  Hz, 1H, H<sub>4</sub>), 7.46 (ddd,  $J = 7.5, 4.9, 1.1$  Hz, 1H, H<sub>5</sub>), 7.16 (s, 2H, H<sub>13</sub>+H<sub>17</sub>), 2.17 (s, 6H, H<sub>19</sub>+H<sub>20</sub>). <sup>13</sup>C NMR (151 MHz, DMSO-*d*<sub>6</sub>)  $\delta$  166.77 (C<sub>10</sub>), 158.40 (C<sub>7</sub>), 149.73 (C<sub>6</sub>), 149.28 (C<sub>2</sub>), 148.97 (C<sub>15</sub>), 137.52 (C<sub>4</sub>), 132.53 (C<sub>12</sub>), 125.11 (C<sub>14</sub>+C<sub>16</sub>), 124.61 (C<sub>5</sub>), 119.25 (C<sub>3</sub>), 118.67 (C<sub>13</sub>+C<sub>17</sub>), 16.87 (C<sub>19</sub>+C<sub>20</sub>). IR (ATR, selected bands,  $\tilde{\nu}_{\max}$ ): 2904.09, 1586.36, 1493.98, 1427.72, 1217.70, 1114.60, 1029.35, 668.90 cm<sup>-1</sup>. UV-vis (MeOH),  $\lambda_{\max}$ , nm ( $\epsilon$ , M<sup>-1</sup>cm<sup>-1</sup>): 261 (17281), 348 (20800). Crystals of **HL<sup>1a'</sup>** suitable for X-ray diffraction study were obtained upon re-crystallization from methanol.

#### N-(4-Oxocyclohexa-2,5-dien-1-ylidene)-5-(pyridin-2-yl)-1,3,4-thiadiazol-2-amine

**(HL<sup>1a''</sup>·0.5H<sub>2</sub>O)**. To a suspension of **HL<sup>1</sup>·0.5H<sub>2</sub>O** (50 mg, 0.16 mmol) in methanol (2.5 mL) was added dropwise a solution of 2,3-dichloro-5,6-dicyano-1,4-benzoquinone (DDQ, 75.6 mg, 0.33 mmol) in methanol (2.5 mL). The reaction mixture was stirred at room temperature for 1 h. Then the solvent was removed under reduced pressure and the bright orange product was purified by column chromatography on silica by using a mixture of ethyl acetate and chloroform (1:20) as eluent. The second fraction with  $R_f = 0.44$  was collected. Yield: 71.63% (35 mg) as **HL<sup>1a''</sup>·0.5H<sub>2</sub>O**. Anal. Calcd for C<sub>15</sub>H<sub>12</sub>N<sub>4</sub>OS·0.5H<sub>2</sub>O ( $M_r = 305.36$ ): C, 59.00; H, 4.29; N, 18.35; S, 10.50 %. Found, %: C, 58.64; H, 3.90; N, 18.02; S, 10.40. Positive ion ESI-MS for C<sub>15</sub>H<sub>12</sub>N<sub>4</sub>OS (MeCN/MeOH +1% H<sub>2</sub>O):  $m/z$  297.18 [HL<sup>1a''</sup>+H]<sup>+</sup>, 319.20 [HL<sup>1a''</sup>+Na]<sup>+</sup>. <sup>1</sup>H NMR (500 MHz, DMSO-*d*<sub>6</sub>)  $\delta$  8.71 (ddd,  $J = 4.8, 1.7, 1.0$  Hz, 1H, H<sub>6</sub>), 8.26 (dt,  $J = 7.9, 1.0$  Hz, 1H, H<sub>3</sub>), 8.06 (td,  $J$

= 7.7, 1.7 Hz, 1H, H<sub>4</sub>), 7.60 (ddd,  $J = 7.6, 4.8, 1.2$  Hz, 1H, H<sub>5</sub>), 7.46 (dq,  $J = 2.8, 1.3$  Hz, 1H, H<sub>13</sub>), 7.20 (dq,  $J = 2.7, 1.5$  Hz, 1H, H<sub>17</sub>), 2.05 (d,  $J = 1.5$  Hz, 3H, H<sub>20</sub>), 2.00 (d,  $J = 1.5$  Hz, 3H, H<sub>19</sub>). <sup>13</sup>C NMR (126 MHz, DMSO-*d*<sub>6</sub>)  $\delta$  187.14 (C<sub>15</sub>), 171.58 (C<sub>10</sub>), 169.98 (C<sub>7</sub>), 162.21 (C<sub>12</sub>), 150.25 (C<sub>6</sub>), 148.19 (C<sub>2</sub>), 143.89 (C<sub>14</sub>), 143.11 (C<sub>16</sub>), 138.06 (C<sub>4</sub>), 136.08 (C<sub>17</sub>), 126.14 (C<sub>5</sub>), 125.96 (C<sub>13</sub>), 120.04 (C<sub>3</sub>), 16.10 (C<sub>19</sub>), 15.66 (C<sub>20</sub>). IR (ATR, selected bands,  $\tilde{\nu}_{\max}$ ): 2961.43, 1641.11, 1541.66, 1323.64, 1211.98, 1008.08, 942.99, 899.83, 778.65 cm<sup>-1</sup>. UV-vis (MeOH),  $\lambda_{\max}$ , nm ( $\epsilon$ , M<sup>-1</sup>cm<sup>-1</sup>): 302 (36457), 410 sh. Crystals of **HL**<sup>1a''</sup> suitable for X-ray diffraction study were obtained from DMSO-*d*<sub>6</sub>.

**2-Acetylpyridine (6-hydroxy-5,7-dimethyl-1,3-benzothiazol-2-yl)hydrazone (HL<sup>2c'</sup>)**. A solution of phenyliodine(III) diacetate (PIDA, 205.2 mg, 0.64 mmol) in glacial acetic acid (3 mL) was added dropwise to a cold suspension of **HL**<sup>2</sup>·**0.2H<sub>2</sub>O** (200 mg, 0.63 mmol) in glacial acetic acid (7 mL). The solution was stirred at room temperature for 1 h. Then the solvent was partially removed under reduced pressure and the concentrated solution was left for crystallization at 4 °C. The light rosa precipitate of **HL**<sup>2c'</sup>·**CH<sub>3</sub>COOH** was filtered off, washed with cold methanol and dried *in vacuo*. Yield: 142.5 mg, 60.73%. Anal. Calcd for C<sub>16</sub>H<sub>16</sub>N<sub>4</sub>OS·CH<sub>3</sub>COOH ( $M_r = 372.44$ ): C, 58.05; H, 5.41; N, 15.04; S, 8.61%. Found, %: C, 58.51; H, 5.38; N, 15.41; S, 8.58. <sup>1</sup>H NMR (600 MHz, DMSO-*d*<sub>6</sub>)  $\delta$  11.76 (s, 2H, H<sub>9</sub>+NH), 8.58 (d,  $J = 5.5$  Hz, 1H, H<sub>6</sub>), 8.18 (s, 1H, H<sub>18</sub>), 8.08 (d,  $J = 8.0$  Hz, 1H, H<sub>3</sub>), 7.85 (td,  $J = 7.7, 1.4$  Hz, 1H, H<sub>4</sub>), 7.36 (dd,  $J = 6.7, 5.4$  Hz, 1H, H<sub>5</sub>), 7.02 (s, 1H, H<sub>13</sub>), 2.40 (s, 3H, H<sub>7</sub>), 2.28 (s, 3H, H<sub>20</sub>), 2.22 (s, 3H, H<sub>19</sub>), 1.91 (s, 3H, CH<sub>3</sub>COOH). <sup>13</sup>C NMR (151 MHz, DMSO-*d*<sub>6</sub>)  $\delta$  172.00 (C=O, CH<sub>3</sub>COOH), 166.47 (C<sub>10</sub>), 155.22 (C<sub>2</sub>), 153.88 (C<sub>12</sub>), 149.29 (C<sub>7</sub>), 148.57 (C<sub>6</sub>), 148.14 (C<sub>15</sub>), 136.43 (C<sub>4</sub>), 126.88 (C<sub>17</sub>), 124.07 (C<sub>14</sub> or C<sub>16</sub>), 123.35 (C<sub>5</sub>), 119.65 (C<sub>3</sub>), 117.44 (C<sub>14</sub> or C<sub>16</sub>), 115.78 (C<sub>13</sub>), 21.04 (CH<sub>3</sub>, CH<sub>3</sub>COOH), 17.08 (C<sub>19</sub>), 15.47 (C<sub>20</sub>), 12.55 (C<sub>7</sub>). <sup>15</sup>N NMR (61 MHz, DMSO-*d*<sub>6</sub>)  $\delta$  337.75 (N<sub>8</sub>), 309.86 (N<sub>1</sub>). IR of (ATR, selected bands,  $\tilde{\nu}_{\max}$ ): 2322.13, 1571.13, 1426.14, 1201.77, 1038.02, 1013.17, 781.99, 643.45 cm<sup>-1</sup>. UV-vis (MeOH),  $\lambda_{\max}$ , nm ( $\epsilon$ , M<sup>-1</sup>cm<sup>-1</sup>): 255 sh, 345 (18303), 465 sh. Then **HL**<sup>2c'</sup>·**CH<sub>3</sub>COOH** (120 mg, 0.32 mmol) was dissolved in water (10 mL) and pH was adjusted to 7-8 with a saturated solution of NaHCO<sub>3</sub>. The crude **HL**<sup>2c'</sup> was extracted with ethyl acetate (4 × 30 mL). Evaporation of ethyl acetate to ¼ of original volume afforded the first portion of *E*-isomer, which was isolated by filtration and drying in air (53 mg of beige powder). The filtrate was concentrated and purified chromatographically on silica by using EtOAc as eluent. A second portion of the *E*-isomer of **HL**<sup>2c'</sup> (10 mg) was obtained by collecting the third fraction (fr<sub>3</sub>, R<sub>f</sub> = 0.63). Overall yield of *E*-**HL**<sup>2c'</sup>: (63 mg, 63%) as **HL**<sup>2c'</sup>. Second fraction (fr<sub>2</sub>, R<sub>f</sub> = 0.77) was collected as an orange powder and identified as the *Z*-isomer of **HL**<sup>2c'</sup>. Yield: 10 mg, 10.0%. The first red fraction (fr<sub>1</sub>, R<sub>f</sub> = 0.92) was

identified as **HL<sup>2c'</sup>**. Anal. Calcd for C<sub>16</sub>H<sub>16</sub>N<sub>4</sub>OS (*E*-isomer, *M<sub>r</sub>* = 312.39): C, 61.52; H, 5.16; N, 17.93; S, 10.26%. Found, %: C, 61.49; H, 5.21; N, 17.55; S, 10.01. Positive ion ESI-MS for C<sub>16</sub>H<sub>16</sub>N<sub>4</sub>OS, *E/Z*-isomers of **HL<sup>2c'</sup>** (MeCN/MeOH +1% H<sub>2</sub>O): *m/z* 313.21 [**HL<sup>2c'</sup>**+H]<sup>+</sup>, negative ion ESI-MS: *m/z* 310.98 [**HL<sup>2c'</sup>**-H]<sup>-</sup>. <sup>1</sup>H NMR (500 MHz, DMSO-*d*<sub>6</sub>, *E*-isomer) δ 11.58 (s, 1H, H<sub>9</sub>), 8.58 (ddd, *J* = 4.8, 1.7, 0.9 Hz, 1H, H<sub>6</sub>), 8.20 (s, 1H, H<sub>18</sub>), 8.07 (d, *J* = 8.1 Hz, 1H, H<sub>3</sub>), 7.85 (td, *J* = 7.8, 1.7 Hz, 1H, H<sub>4</sub>), 7.36 (ddd, *J* = 7.4, 4.9, 1.0 Hz, 1H, H<sub>5</sub>), 7.02 (brs, 1H, H<sub>13</sub>), 2.40 (s, 3H, H<sub>7</sub>), 2.28 (s, 3H, H<sub>20</sub>), 2.22 (s, 3H, H<sub>19</sub>). <sup>13</sup>C NMR (151 MHz, DMSO-*d*<sub>6</sub>, *E*-isomer) δ 155.15 (C<sub>2</sub>), 148.57 (C<sub>6</sub>), 148.15 (C<sub>15</sub>), 136.44 (C<sub>4</sub>), 124.07 (C<sub>14</sub> or C<sub>16</sub>), 123.35 (C<sub>5</sub>), 119.65 (C<sub>3</sub>), 117.80 (C<sub>14</sub> or C<sub>16</sub>), 17.09 (C<sub>19</sub>), 15.54 (C<sub>20</sub>), 12.56 (C<sub>7</sub>). <sup>1</sup>H NMR (500 MHz, DMSO-*d*<sub>6</sub>, *Z*-isomer) δ 15.00 (s, 1H, H<sub>9</sub>), 8.85 (d, *J* = 3.5 Hz, 1H, H<sub>6</sub>), 8.22 (s, 1H, H<sub>18</sub>), 8.08 (t, *J* = 7.3 Hz, 1H, H<sub>4</sub>), 7.79 (d, *J* = 7.7 Hz, 1H, H<sub>3</sub>), 7.58 (m, 1H, H<sub>5</sub>), 7.15 (s, 1H, H<sub>13</sub>), 2.40 (s, 3H, H<sub>7</sub>), 2.31 (s, 3H, H<sub>20</sub>), 2.22 (s, 3H, H<sub>19</sub>). <sup>13</sup>C NMR (151 MHz, DMSO-*d*<sub>6</sub>, *Z*-isomer) δ 152.61 (C<sub>2</sub>), 148.39 (C<sub>15</sub>), 147.63 (C<sub>6</sub>), 138.29 (C<sub>4</sub>), 124.26 (C<sub>5</sub>), 124.08 (C<sub>3</sub>), 118.98 (C<sub>13</sub>), 117.67 (C<sub>14</sub> or C<sub>16</sub>), 21.72 (C<sub>7</sub>), 17.20 (C<sub>19</sub>), 15.87 (C<sub>20</sub>). IR (*E*-isomer, ATR, selected bands,  $\tilde{\nu}_{\max}$ ): 3309.21, 1565.44, 1462.63, 1428.84, 1213.07, 1149.94, 1103.32, 1016.42 cm<sup>-1</sup>. IR (*Z*-isomer, ATR, selected bands,  $\tilde{\nu}_{\max}$ ): 2921.95, 2854.29, 2322.04, 1727.80, 1541.22, 1463.34, 1063.33, 832.32, 648.31 cm<sup>-1</sup>. UV-vis (*E*-isomer, MeOH,  $\lambda_{\max}$ , nm ( $\epsilon$ , M<sup>-1</sup>cm<sup>-1</sup>)): 256 (16778), 346 (23875), 464 sh. UV-vis (*Z*-isomer, MeOH,  $\lambda_{\max}$ , nm ( $\epsilon$ , M<sup>-1</sup>cm<sup>-1</sup>)): 266 (3638), 367 (4387), 474 sh.

**5,7-Dimethyl-2-[[1-(pyridin-2-yl)ethylidene]hydrazineylidene]benzo[d]thiazol-6(2*H*)-one (HL<sup>2c''</sup>)**. A solution of phenyliodine(III) diacetate (PIDA, 103 mg, 0.32 mmol) in glacial acetic acid (4 mL) was added to a suspension of **HL<sup>2</sup>·0.2H<sub>2</sub>O** (50 mg, 0.16 mmol) in glacial acetic acid (1 mL). The solution was stirred at room temperature for 1.5 h. Then the solvent was partially removed under reduced pressure and the concentrated solution was left for crystallization at 4 °C. The red precipitate of **HL<sup>2c''</sup>** was filtered off and washed with cold methanol. The collected precipitate was recrystallized from chloroform and afterwards dried *in vacuo*. Yield: 31 mg, 48.4%. Anal. Calcd for C<sub>16</sub>H<sub>14</sub>N<sub>4</sub>OS·0.75CHCl<sub>3</sub> (*M<sub>r</sub>* = 399.91): C, 50.31; H, 3.72; N, 14.01; S, 8.02%. Found, %: C, 50.32; H, 3.67; N, 14.24; S, 8.43. Positive ion ESI-MS for C<sub>16</sub>H<sub>14</sub>N<sub>4</sub>OS (MeCN/MeOH +1% H<sub>2</sub>O): *m/z* 311.12 [**HL<sup>2c''</sup>**+H]<sup>+</sup>, 333.11 [**HL<sup>2c''</sup>**+Na]<sup>+</sup>, 643.14 [2**HL<sup>2c''</sup>**+Na]<sup>+</sup>, negative ion ESI-MS: *m/z* 309.01 [**HL<sup>2c''</sup>**-H]<sup>-</sup>. <sup>1</sup>H NMR (500 MHz, DMSO-*d*<sub>6</sub>) δ 8.73 (s, 1H), 8.25 (d, *J* = 5.7 Hz, 1H), 8.06 – 7.91 (m, 1H), 7.65 (s, 1H), 7.57 (s, 1H), 2.61 (s, 3H), 2.10 (s, 3H), 2.06 (s, 3H). <sup>1</sup>H NMR (500 MHz, CDCl<sub>3</sub>) δ 8.70 (d, *J* = 4.3 Hz, 1H, H<sub>6</sub>), 8.34 (d, *J* = 8.0 Hz, 1H, H<sub>3</sub>), 7.80 (td, *J* = 7.8, 1.3 Hz, 1H, H<sub>4</sub>), 7.44 (brs, 1H, H<sub>13</sub>), 7.38 (dd, *J* = 6.7, 5.2 Hz, 1H, H<sub>5</sub>), 2.72 (s, 3H, H<sub>7</sub>), 2.18 (s, 3H, H<sub>19</sub>), 2.14 (s, 3H, H<sub>20</sub>). <sup>13</sup>C NMR (151 MHz, CDCl<sub>3</sub>) δ 184.43 (C<sub>15</sub>), 173.74

(C<sub>10</sub>), 169.74 (C<sub>12</sub>), 169.42 (C<sub>7</sub>), 154.97 (C<sub>2</sub>), 149.29 (C<sub>6</sub>), 145.86 (C<sub>14</sub> or C<sub>16</sub>), 145.41 (C<sub>14</sub> or C<sub>16</sub>), 136.46 (C<sub>4</sub>), 129.52 (C<sub>13</sub>), 129.25 (C<sub>17</sub>), 125.34 (C<sub>5</sub>), 122.31 (C<sub>3</sub>), 17.38 (C<sub>19</sub>), 15.54 (C<sub>20</sub>), 14.88 (C<sub>7</sub>). IR (ATR, selected bands,  $\tilde{\nu}_{\max}$ ): 2918.15, 1616.23, 1584.52, 1464.22, 1362.22, 1245.16, 1157.17, 907.55, 780.68, 744.00, 687.98 cm<sup>-1</sup>. UV-vis (MeOH),  $\lambda_{\max}$ , nm ( $\epsilon$ , M<sup>-1</sup>cm<sup>-1</sup>): 290 (8232), 391 (12367), 480 (8985). Crystals of **HL<sup>2c'</sup>·0.5CHCl<sub>3</sub>** suitable for X-ray diffraction study were obtained from chloroform solution.

**4-(4-Hydroxy-3,5-dimethylphenyl)-5-methyl-5-(pyridin-2-yl)-4,5-dihydro-3H-1,2,4-triazole-3-thione (HL<sup>2b</sup>)** and **2-acetylpyridine {5-hydroxy-3-[(4-hydroxy-3,5-dimethylphenyl)amino]-4,6-dimethyl-1H-indol-2-yl}hydrazone (HL<sup>2e</sup>)**. A solution of *p*-benzoquinone (PBQ, 27 mg, 0.25 mmol) in methanol (1 mL) was added to suspension of **HL<sup>2</sup>·0.2H<sub>2</sub>O** (80 mg, 0.25 mmol) in methanol (8 mL). The reaction mixture was heated at 60 °C overnight. The methanol was removed by evaporation, the residue was chromatographed, using as eluent, mixture of ethyl acetate, hexane and methanol (2:6:1) to obtain the oxidation products **HL<sup>2b</sup>** ( $R_f$  = 0.69) and **HL<sup>2e</sup>** ( $R_f$  = 0.57) in small amounts. Positive ion ESI-MS for C<sub>16</sub>H<sub>16</sub>N<sub>4</sub>OS (**HL<sup>2b</sup>**) (MeCN/MeOH +1% H<sub>2</sub>O):  $m/z$  313.25 [**HL<sup>2b</sup>+H**]<sup>+</sup>, 335.14 [**HL<sup>2b</sup>+Na**]<sup>+</sup>, negative ion ESI-MS:  $m/z$  310.99 [**HL<sup>2b</sup>-H**]<sup>-</sup>. <sup>1</sup>H NMR (**HL<sup>2b</sup>**, 500 MHz, DMSO-*d*<sub>6</sub>)  $\delta$  8.67 (s, 1H, OH), 8.65 (ddd,  $J$  = 4.7, 1.7, 0.8 Hz, 1H, H<sub>py</sub>), 7.94 (td,  $J$  = 7.8, 1.8 Hz, 1H, H<sub>py</sub>), 7.59 (d,  $J$  = 8.0 Hz, 1H, H<sub>py</sub>), 7.51 (ddd,  $J$  = 7.6, 4.7, 0.9 Hz, 1H, H<sub>py</sub>), 6.39 (s, 2H, H<sub>ph</sub>), 2.06 (s, 3H, CH<sub>3</sub>), 2.01 (s, 6H, 2CH<sub>3</sub>). UV-vis (**HL<sup>2b</sup>**, MeOH),  $\lambda_{\max}$ , nm ( $\epsilon$ , M<sup>-1</sup>cm<sup>-1</sup>): 261 sh, 296 (5339), 346 (4985). Crystals suitable for X-ray diffraction study were obtained from ethanol (**HL<sup>2b</sup>**) or methanol (**HL<sup>2e</sup>**) solutions.

## 1.2. Synthesis of copper(II) complexes with oxidized ligands

**[Cu(HL<sup>1d</sup>)<sub>2</sub>Cl<sub>2</sub>] (5)**. CuCl<sub>2</sub>·2H<sub>2</sub>O (23 mg, 0.13 mmol) was added to **HL<sup>1a''</sup>·0.5H<sub>2</sub>O** (40 mg, 0.13 mmol) in methanol (25 mL) and stirred at 80 °C for 72 h. The reaction mixture was allowed to stand at 4 °C overnight. The bright green precipitate was filtered off, washed with methanol and dried *in vacuo*. Yield: 19.5 mg. Positive ion ESI-MS for C<sub>14</sub>H<sub>12</sub>N<sub>8</sub>S<sub>2</sub>CuCl<sub>2</sub> (MeCN/MeOH+1% H<sub>2</sub>O):  $m/z$  209.50 [Cu(HL<sup>1d</sup>)<sub>2</sub>]<sup>2+</sup>, 419.03 [Cu<sup>1</sup>(HL<sup>1d</sup>)<sub>2</sub>]<sup>+</sup>, 453.93 [Cu(HL<sup>1d</sup>)<sub>2</sub>Cl]<sup>+</sup>, 459.05 [Cu(HL<sup>1d</sup>)<sub>2</sub>]<sup>2+</sup>+MeCN-H]<sup>+</sup>. IR (ATR, selected bands,  $\tilde{\nu}_{\max}$ ): 3226.02, 3087.67, 2322.41, 1608.77, 1513.30, 1420.89, 1351.58, 1317.22, 1150.55, 782.01, 720.75 cm<sup>-1</sup>. UV-vis (MeOH),  $\lambda_{\max}$ , nm ( $\epsilon$ , M<sup>-1</sup>cm<sup>-1</sup>): 249 (15476), 281 sh, 343 (13271). Crystals of **[Cu(HL<sup>1d</sup>)<sub>2</sub>Cl<sub>2</sub>]** suitable for X-ray diffraction study were grown from methanolic solution of **5**.

**[Cu(HL<sup>2c'</sup>)Cl<sub>2</sub>] (6)**. CuCl<sub>2</sub>·2H<sub>2</sub>O (11 mg, 0.06 mmol) was added in one portion under argon to solution of **HL<sup>2c'</sup>** (20 mg, 0.06 mmol) in anoxic methanol (5 mL) and stirred at room temperature

for 1 h. The reaction mixture was allowed to stand at +4 °C overnight. The brown-reddish precipitate was filtered off, washed with anoxic methanol and dried *in vacuo*. Yield: 19 mg. Positive ion ESI-MS for C<sub>16</sub>H<sub>16</sub>N<sub>4</sub>OSC<sub>u</sub>Cl<sub>2</sub> (MeCN/MeOH+1% H<sub>2</sub>O): *m/z* 374.08 [Cu(HL<sup>2c'</sup>)<sup>2+</sup>-H]<sup>+</sup>, 410.05 [Cu(HL<sup>2c'</sup>)Cl]<sup>+</sup>, 820.95 [2Cu(L<sup>2c'</sup>)Cl+H]<sup>+</sup>, negative ion ESI-MS: *m/z* 407.93 [Cu(HL<sup>2c'</sup>)Cl<sup>+</sup>-2H]<sup>-</sup>, 854.75 [2Cu(L<sup>2c'</sup>)+3Cl]<sup>-</sup>. IR (ATR, selected bands,  $\tilde{\nu}_{\max}$ ): 2322.16, 1637.16, 1595.67, 1528.72, 1464.37, 1418.27, 1227.93, 1178.21, 1097.33, 1010.12, 896.16 cm<sup>-1</sup>. UV-vis (MeOH),  $\lambda_{\max}$ , nm ( $\epsilon$ , M<sup>-1</sup>cm<sup>-1</sup>): 288 sh, 335 sh, 402 sh, 473 (5181). Crystals of [Cu(HL<sup>2c'</sup>)Cl<sub>2</sub>] suitable for X-ray diffraction study were grown by slow diffusion of diethyl ether in methanol solution of **6**.

## 2. Characterization of the compounds

### 2.1. Physical measurements

Elemental analyses were carried out in a Carlo-Erba microanalyzer at the Microanalytical Laboratory of the University of Vienna. Electrospray ionization mass spectrometry (ESI-MS) was carried out with amaZon speed ETD Bruker instrument. Expected and experimental isotope distributions were compared. UV-vis spectra were measured on Perkin Elmer UV-vis spectrophotometer Lambda 35 in the 240 to 700 nm window using samples dissolved in methanol. IR spectra were recorded on a Bucker Vertex 70 Fourier transform IR spectrometer (4000–600 cm<sup>-1</sup>) using the ATR technique. 1D (<sup>1</sup>H, <sup>13</sup>C) and 2D (<sup>1</sup>H-<sup>1</sup>H COSY, <sup>1</sup>H-<sup>1</sup>H TOCSY, <sup>1</sup>H-<sup>1</sup>H NOESY, <sup>1</sup>H-<sup>13</sup>C HSQC, <sup>1</sup>H-<sup>13</sup>C HMBC, <sup>1</sup>H-<sup>15</sup>N HSQC, <sup>1</sup>H-<sup>15</sup>N HMBC) NMR spectra were acquired on a Bruker AV NEO 500 or AV III 600 spectrometers in DMSO-*d*<sub>6</sub>, MeOH-*d*<sub>4</sub>, CDCl<sub>3</sub> at 25 °C.

### 2.2. Crystallographic Structure Determination

X-ray diffraction measurements were performed on either Bruker X8 APEX-II CCD or Bruker D8 Venture diffractometer. Single crystals were positioned at 30, 40, 27, 27, 26, 27, 26, 26, 26, 30, 30, 27, 30 and 26 mm from the detector, and 897, 158, 2225, 500, 1499, 2477, 884, 1279, 2395, 360, 360, 1081, 1959 and 1000 frames were measured, each for 2, 10, 10, 40, 20, 1, 15, 5, 4, 3, 10, 50, 10 and 2 s over 0.6, 1, 0.5, -0.360, 0.360, 0.360, -0.360, 0.360, 0.360, 0.5, 0.5, 0.5, 0.360 and -0.360° scan width for **HL**<sup>1</sup>·C<sub>2</sub>H<sub>5</sub>OH, **HL**<sup>2</sup>, **HL**<sup>3</sup>, **HL**<sup>1a'</sup>, **HL**<sup>1a''</sup>, **ATSC'**, **HL**<sup>2b</sup>, **HL**<sup>2c''</sup>·0.5CHCl<sub>3</sub>, **HL**<sup>2e</sup>, **1'**·CH<sub>3</sub>OH, **3'**·CH<sub>3</sub>OH, **4–6**, respectively. Compound **2'** was measured at the XRD2 structural biology beamline, Elettra synchrotron. The beamline is equipped with an Arinax MD2S diffractometer and a Pilatus 6M area detector and monochromated X-rays are provided by a

superconducting wiggler followed by a dual crystal monochromator. Frame integration was performed using the XDS package.<sup>1</sup> Crystal data, data collection parameters, and structure refinement details are given in Tables S1–S3 in Supporting Information. The structures were solved by direct methods and refined by full-matrix least-squares techniques. Non-H atoms were refined with anisotropic displacement parameters. H atoms were inserted in calculated positions and refined with a riding model. The following computer programs and hardware were used: structure solution, *SHELXS-2014* and refinement, *SHELXL-2014*;<sup>2</sup> molecular diagrams, *ORTEP*; computer, Intel CoreDuo. CCDC 2074027 (**HL**<sup>1</sup>·**C<sub>2</sub>H<sub>5</sub>OH**), 2074029 (**HL**<sup>2</sup>), 2074028 (**HL**<sup>3</sup>), 2074023 (**HL**<sup>1a'</sup>), 2074017 (**HL**<sup>1a''</sup>), 2074018 (**ATSC**<sup>1</sup>), 2074019 (**HL**<sup>2b</sup>), 2074341 (**HL**<sup>2c''</sup>·**0.5CHCl<sub>3</sub>**) 2074025 (**HL**<sup>2e</sup>), 2074020 (**1**<sup>1</sup>·**CH<sub>3</sub>OH**), 2074022 (**2**<sup>1</sup>), 2074021 (**3**<sup>1</sup>·**CH<sub>3</sub>OH**), 2074030 (**4**), 2074026 (**5**) and 2074024 (**6**).

### 2.3. Spectroscopic studies: UV–vis titrations, kinetic measurements and lipophilicity determination

An Agilent Carry 8454 diode array spectrophotometer was used to record the UV–vis spectra in the interval 200–800 nm. The path length was 1 cm. Proton dissociation constants ( $pK_a$ ) of the proligands were calculated by the computer program PSEQUAD.<sup>3</sup> Spectrophotometric titrations were performed on samples containing the proligands at 50–100  $\mu\text{M}$  concentration by a KOH solution in the presence of 0.1 M KCl at  $25.0 \pm 0.1$  °C in the pH range from 1 to 12.5 in 30% (v/v) DMSO/H<sub>2</sub>O solvent mixture. An Orion 710A pH-meter equipped with a Metrohm combined electrode (type 6.0234.100) and a Metrohm 665 Dosimat burette were used for the titrations. The electrode system was calibrated to the  $\text{pH} = -\log[\text{H}^+]$  scale by means of blank titrations (HCl vs KOH) according to the method suggested by Irving *et al.*<sup>4</sup> The average water ionization constant ( $pK_w$ ) is  $14.54 \pm 0.05$  in 30% (v/v) DMSO/H<sub>2</sub>O, which corresponds well to literature data.<sup>5</sup> Argon was also passed over the solutions during the titrations. Measurements were carried out in the range *ca.* 1.0–2.0 by preparing individual samples in which KCl was partially or completely replaced by HCl and pH values were calculated from the strong acid content. The conditional stability constants ( $K'$ ) of the copper(II) complexes were calculated at pH 5.90 based on the spectral changes via the displacement reaction with EDTA in the presence 50 mM MES and 0.1 M KCl in 30% (v/v) DMSO/H<sub>2</sub>O. In the competition experiments the samples contained 25  $\mu\text{M}$  copper(II), 25  $\mu\text{M}$  proligand and the concentration of EDTA was varied in the range from 0 to 150  $\mu\text{M}$ . The conditional stability constants of the metal complexes ( $K'$ ) and the individual spectra of the species were calculated by the computer program PSEQUAD.<sup>3</sup>



The time-dependence of UV–vis absorption spectra was monitored for proligands **HL**<sup>2</sup> at pH 7.4, 1.5 and 10.0 in 30% (v/v) DMSO/H<sub>2</sub>O, and for **HL**<sup>1</sup> and **HL**<sup>3</sup> at pH 7.4.

The redox reaction of the copper(II) complexes (25 μM) with GSH (1250 μM) was studied at 7.40 (50 mM HEPES buffer with 0.1 M KCl) and at 25.0 ± 0.1 °C on Hewlett Packard 8452A diode array spectrophotometer using a special, tightly closed tandem cuvette (Hellma Tandem Cell, 238-QS) as described previously.<sup>6,7</sup> Calculation of the observed rate constants ( $k_{\text{obs}}$ ) of the redox reaction was performed by using a reported approach.<sup>6,7</sup>

Distribution coefficients ( $D_{7.4}$ ) values were determined by the traditional shake-flask method in *n*-octanol/buffered aqueous solution at pH 7.40 (50 mM HEPES buffer at 25.0 ± 0.2 °C as described previously in our previous work.<sup>8</sup>

#### 2.4. Spectroelectrochemical studies

Cyclic voltammetry experiments with 0.5 mM solutions of Cu(II) complexes and corresponding ligands in 0.1 M *n*-Bu<sub>4</sub>NPF<sub>6</sub> in both DMSO and methanol were performed under argon atmosphere using a three-electrode arrangement with glassy carbon 1 mm disc working electrode (from Ionode, Australia), platinum wire as counter electrode, and silver wire as pseudo-reference electrode. As a supporting electrolyte, 0.1 M *n*-Bu<sub>4</sub>NPF<sub>6</sub> was used in DMSO (SeccoSolv max. 0.025% H<sub>2</sub>O, Merck) and 0.1 M LiClO<sub>4</sub> (≥95.0%, Merck) in methanol. Ferrocene (Fc, from Sigma-Aldrich) served as the internal potential standard. The potentials vs Fc<sup>+</sup>/Fc in DMSO solutions were recalculated to the corresponding values vs NHE using known value of  $E_{1/2}(\text{Fc}^+/\text{Fc}) = +0.435$  V vs SCE in DMSO<sup>9</sup> (the potential of Saturated Calomel Electrode (SCE) is +0.241 V vs NHE). A Heka PG310USB (Lambrecht, Germany) potentiostat with a PotMaster 2.73 software package served for the potential control in voltammetry studies. In situ UV-visible-near infrared (UV–vis–NIR) spectroelectrochemical measurements were performed on a spectrometer Avantes (Model AvaSpec-2048x14-USB2) in the spectroelectrochemical cell kit (AKSTCKIT3) with the Pt-microstructured honeycomb working electrode (Pine Research Instrumentation). The cell was positioned in the CUV–UV Cuvette Holder (Ocean Optics) connected to the diode-array UV–vis–NIR spectrometer by optical fibres. UV–vis–NIR spectra were processed using the AvaSoft 7.7 software package. Halogen and deuterium lamps were used as light sources (Avantes, Model AvaLight-DH-S-BAL). The *in situ* EPR spectroelectrochemical experiments were carried out under argon atmosphere in the EPR flat cell equipped with a large platinum mesh working electrode. The freshly prepared solutions were carefully purged with argon and the electrolytic cell was polarised in the galvanostatic mode directly in the cylindrical EPR cavity TM-110 (ER 4103

TM) and the EPR spectra were measured *in situ*. The EPR spectra were recorded at room temperature with the EMX Bruker spectrometer (Germany).

## **2.5. *In vitro* cell studies**

### **2.5.1. Cell lines and culture conditions**

All cell culture reagents were obtained from Sigma-Aldrich and plastic ware from Sarstedt (Germany). Doxorubicin-sensitive human colonic Colo 205 and multidrug resistant Colo 320/MDR-LRP adenocarcinoma cell lines were purchased from LGC Promochem, Teddington, UK. The cells were cultured in Roswell Park Memorial Institute (RPMI) 1640 medium supplemented with 10% heat-inactivated fetal bovine serum, 2 mM L-glutamine, 1 mM Na-pyruvate and 100 mM HEPES. The cell lines were incubated at 37°C, in a 5% CO<sub>2</sub>, 95% air atmosphere.

MRC-5 human embryonal lung fibroblast cell line (ATCC CCL-171) was purchased from LGC Promochem, Teddington, UK. The cell line was cultured in Eagle's Minimal Essential Medium (EMEM, containing 4.5 g/L glucose) supplemented with a non-essential amino acid mixture, a selection of vitamins and 10% heat-inactivated fetal bovine serum. The cells were incubated at 37°C, in a 5% CO<sub>2</sub>, 95% air atmosphere. All cell lines were detached with Trypsin-Versene (EDTA) solution for 5 min at 37 °C.

### **2.5.2. MTT assays**

The tested compounds were dissolved in DMSO using 10 mM concentration. Then stock solutions were diluted in complete culture medium in 96-well microtiter plates, and two-fold serial dilutions of compounds were prepared in 100 µL of RPMI 1640, horizontally. The semi-adherent colonic adenocarcinoma cells were treated with Trypsin-Versene (EDTA) solution. They were adjusted to a density of  $1 \times 10^4$  cells in 100 µL of RPMI 1640 medium, and were added to each well, with the exception of the medium control wells. The final volume of the wells containing compounds and cells was 200 µL. The culture were incubated at 37 °C for 72 h; at the end of the incubation period, 20 µL of MTT solution (from a stock solution of 5 mg/mL) were added to each well. After incubation at 37 °C for 4 h, 100 µL of SDS solution (10% in 0.01 M HCl) were added to each well and the plates were further incubated at 37 °C overnight. The cell growth was determined using both methods by measuring the optical density (OD) at 450 nm (ref. 620 nm) with a Multiscan EX ELISA reader. Inhibition of the cell growth (expressed as IC<sub>50</sub>: inhibitory concentration that reduces by 50% the growth of the cells exposed to the tested compounds) was determined from

the sigmoid curve where  $100 - ((OD_{\text{sample}} - OD_{\text{medium control}})/(OD_{\text{cell control}} - OD_{\text{medium control}})) \times 100$  values were plotted against the logarithm of compound concentrations. Curves were fitted by GraphPad Prism software<sup>10</sup> using the sigmoidal dose-response model (comparing variable and fixed slopes).

### 2.5.3. Mechanisms of cell death: assay for apoptosis induction

The assay was carried out for selected compounds using an Annexin V-FITC Apoptosis Detection Kit (Cat. No. APOAF-50TST) from Sigma according to the manufacturer's instructions. The concentration of the Colo320 cell suspension was adjusted to approximately  $0.5 \times 10^6$  cells per mL in RPMI medium and the cell suspension was distributed in 1 mL aliquots into a 24-well plate, and then incubated overnight at 37 °C and 5% CO<sub>2</sub>. On the following day, the medium was removed and replaced by 1 mL RPMI medium containing the compounds except the control samples. Colo320 cells were incubated in the presence of the compounds at 4 and 8 μM (**HL**<sup>1</sup>), or 0.25 and 0.50 μM (**Cu(HL**<sup>2</sup>)**Cl**<sub>2</sub>) in the 24-well plate at 37 °C for 3 h, and 12*H*-benzo[α]phenothiazine (M627, 20 μM)<sup>11</sup> and cisplatin (Teva, 15 and 30 μM) were used as positive controls. After the incubation period the samples were washed with PBS and fresh RPMI medium was added to the samples. The cells were incubated overnight at 37 °C and 5% CO<sub>2</sub>. The next day, 200 μL 0.25% Trypsin (Trypsin-Versen) was added to the samples until cells appeared detached followed by the addition of 400 μL of RPMI medium supplemented with 10% bovine serum. The cells were collected in Eppendorf tubes and centrifuged at 2000 *g* for 2 min. The harvested cells were resuspended in fresh serum free RPMI medium culture medium. After this step, the apoptosis assay was carried out according to the instructions of the manufacturer. The fluorescence was analyzed immediately using a ParTec CyFlow flow cytometer (Partec GmbH, Münster, Germany).

### 2.6. Tyrosyl radical reduction in mouse R2 RNR protein

The tyrosyl radical reduction in mR2 protein by **HL**<sup>1</sup>, **HL**<sup>2</sup>, **HL**<sup>3</sup>, **Cu(HL**<sup>1</sup>)**Cl**<sub>2</sub>, [**Cu(L**<sup>2</sup>)**Cl**], **Cu(HL**<sup>3</sup>)**Cl**<sub>2</sub>, **HL**<sup>1a'</sup>, **HL**<sup>1a''</sup>, and **HL**<sup>2c'</sup>·**CH**<sub>3</sub>**COOH** was measured by EPR spectroscopy at 30 K, on a Bruker Elexsys II E540 EPR spectrometer with an Oxford Instruments ER 4112HV helium cryostat, as described previously.<sup>12,13</sup> mR2 protein was expressed, purified, and iron-reconstituted as described previously,<sup>14</sup> and passed through a 5 mL HiTrap desalting column (GE Healthcare) to remove excess iron. The purified, iron-reconstituted mR2 protein resulted in the formation of 0.76 tyrosyl radical/polypeptide. Samples containing 20 μM mR2 in 50 mM HEPES buffer, pH 7.50/100 mM NaCl, and 20 μM respective compound in 1% (v/v) DMSO/H<sub>2</sub>O, and 2 mM

dithiothreitol (DTT) were incubated for indicated times and quickly frozen in cold isopentane. The same samples were used for repeated incubations at room temperature. The experiments were performed in duplicates.

## 2.7. Computational details

The geometry optimizations of all key stationary points were carried out at the B3LYP level of theory<sup>15</sup> using Gaussian 16 suite<sup>16</sup> of quantum chemical programs. Pople's basis sets, 6-311++G(d,p) from Gaussian library<sup>16</sup> for all atoms were employed for geometry optimization. The effect of continuum solvation was incorporated by using the polarizable continuum model (PCM). Stability of the optimized structures was tested by vibrational analysis (no imaginary vibrations). Enthalpies and Gibbs free energies were obtained by adding unscaled zero-point vibrational energy corrections (ZPVE) and thermal contributions to the energies (temperature 298.150 Kelvin, pressure 1.000 atm). All transition states were fully optimized and characterized as a first-order saddle point by harmonic vibrational frequency analysis. One and only one imaginary frequency of the first-order saddle point was subjected to visual inspection to examine whether it represented the desired reaction coordinate. Furthermore, the intrinsic reaction coordinate (IRC) analysis was performed to authenticate that the transition state pertains to the desired reaction coordinate. The IRC calculations were done at the B3LYP/6-311++G(d,p) level of theory. Molecular orbitals were drawn using Molekel software.<sup>17</sup>

## 3. Schemes for assignment of resonances in HL<sup>1</sup> – HL<sup>3</sup> and their isomers

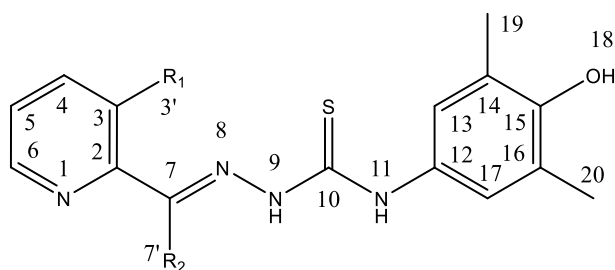

**Scheme S1.** The atom numbering for the assignment of resonances in HL<sup>1</sup> – HL<sup>3</sup>.

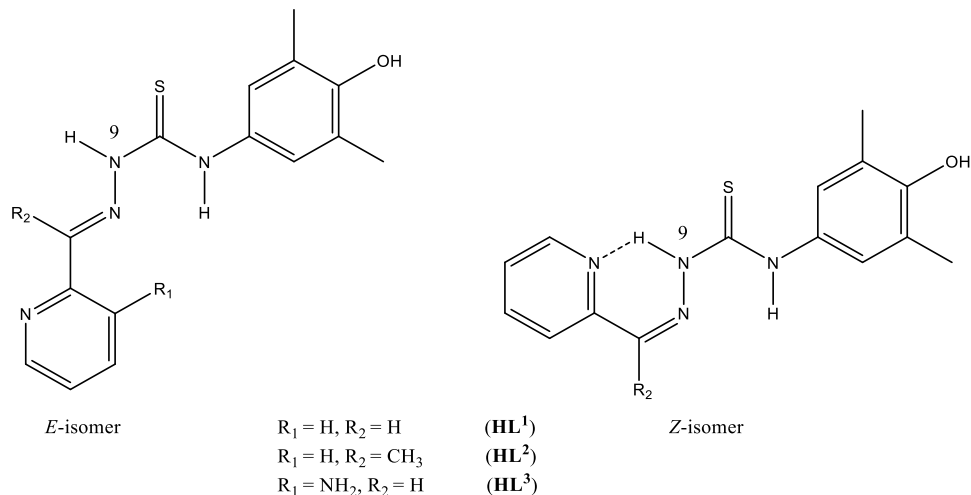

**Scheme S2.** The most stable conformers of **HL<sup>1</sup>** – **HL<sup>3</sup>** in solution.

#### 4. Oxidative cyclization in the presence of Ag<sub>2</sub>O

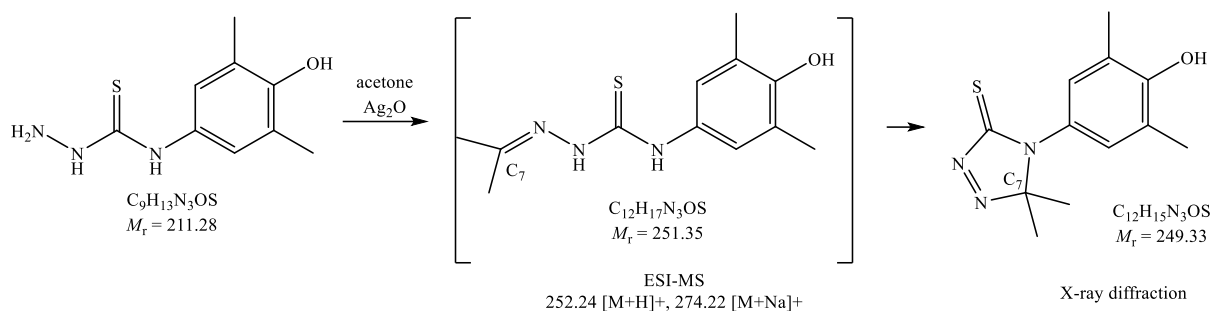

**Scheme S3.** The formation of acetone thiosemicarbazone in solution and its oxidative cyclization in the presence of Ag<sub>2</sub>O.

Oxidation of **HL<sup>1</sup>** with Ag<sub>2</sub>O (at the molar ratio **HL<sup>1</sup>**/Ag<sub>2</sub>O 1:1 at room temperature in acetone for 1–2 h) afforded minor amounts of 1,3,4-thiadiazoles **HL<sup>1a'</sup>** and **HL<sup>1a''</sup>**. The reaction mainly led to complex formation of **HL<sup>1</sup>** with Ag(I) (70–90%). This was confirmed by ESI mass spectra, in which peaks at *m/z* 407.15, 709.20 attributed to [Ag(**HL<sup>1</sup>**)]<sup>+</sup> and [Ag(**HL<sup>1</sup>**)<sub>2</sub>]<sup>+</sup>, respectively, as well as at *m/z* 402.73, 706.98 assigned to [Ag(**HL<sup>1a'</sup>**)–2H]<sup>–</sup>, [Ag(**HL<sup>1</sup>**)<sub>2</sub>–2H]<sup>–</sup> were found. By applying the same reaction conditions (Ag<sub>2</sub>O in acetone) to the starting thiosemicarbazide, *N*-(4-hydroxy-3,5-dimethylphenyl)hydrazinecarbothioamide (Scheme S3 in Supporting Information), the 1,2,4-triazole-3-thione ring formation as reported previously for **HL<sup>2b</sup>** was confirmed by SC-XRD (Figure S2), along with coordination of the oxidized product to Ag(I) by ESI-MS.

5. Schemes for assignment of resonances in **HL**<sup>1a'</sup>, **HL**<sup>1a''</sup>, **HL**<sup>2c'</sup>, **HL**<sup>2c''</sup> and their isomers

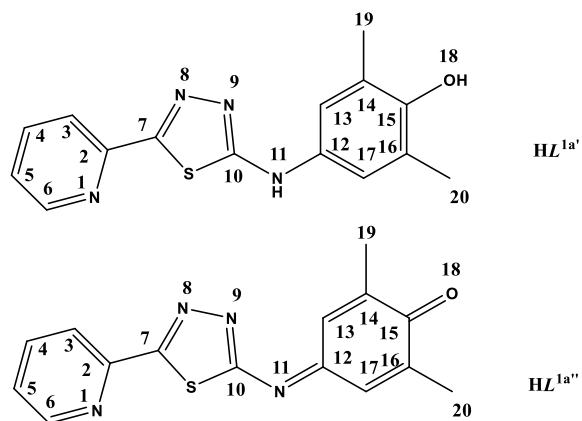

**Scheme S4.** The atom numbering for the assignment of resonances in **HL**<sup>1a'</sup> and **HL**<sup>1a''</sup>.

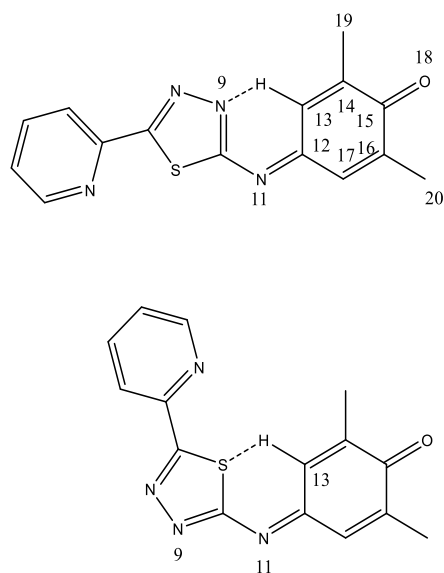

**Scheme S5.** The possible hydrogen bond formations of H<sub>13</sub> to *N*- or *S*- of 1,3,4-thiadiazole ring in **HL**<sup>1a''</sup>.

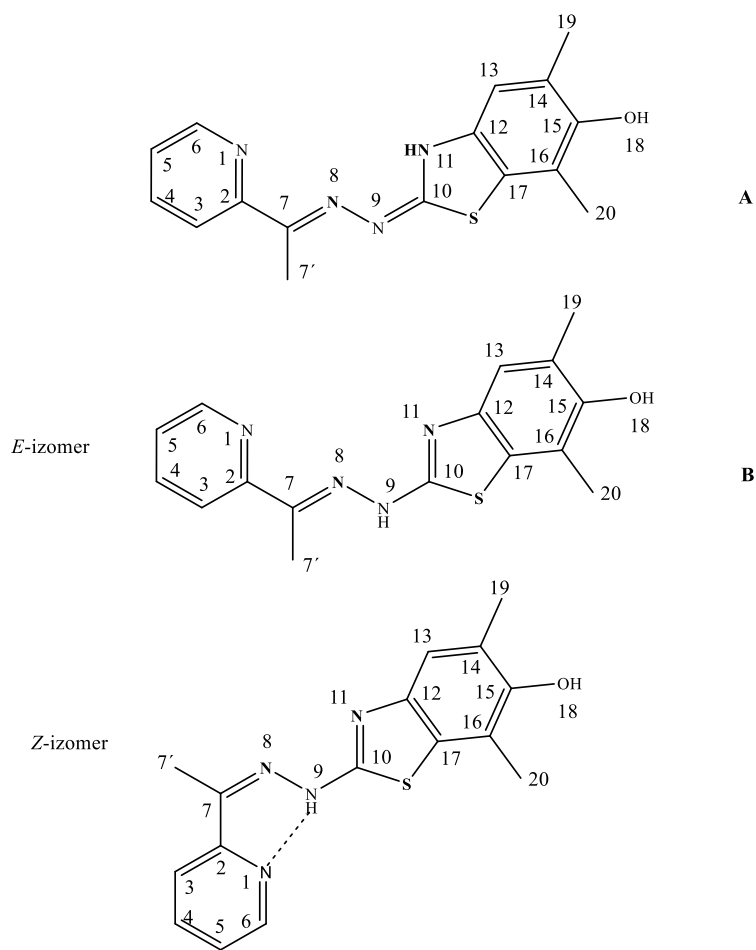

**Scheme S6.** The atom numbering for the assignment of resonances in  $\text{HL}^{2c'}$  and tautomeric forms of  $\text{HL}^{2c'}$  in solution.

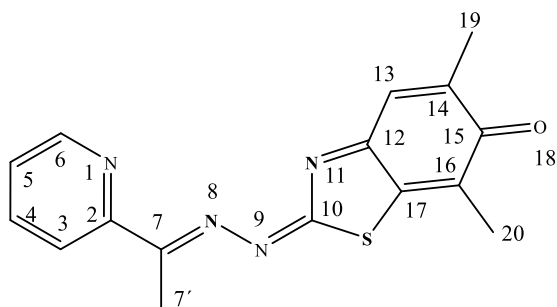

**Scheme S7.** The atom numbering for the assignment of resonances in  $\text{HL}^{2c''}$ .

## 6. Oxidation of $\text{HL}^2$ with PBQ

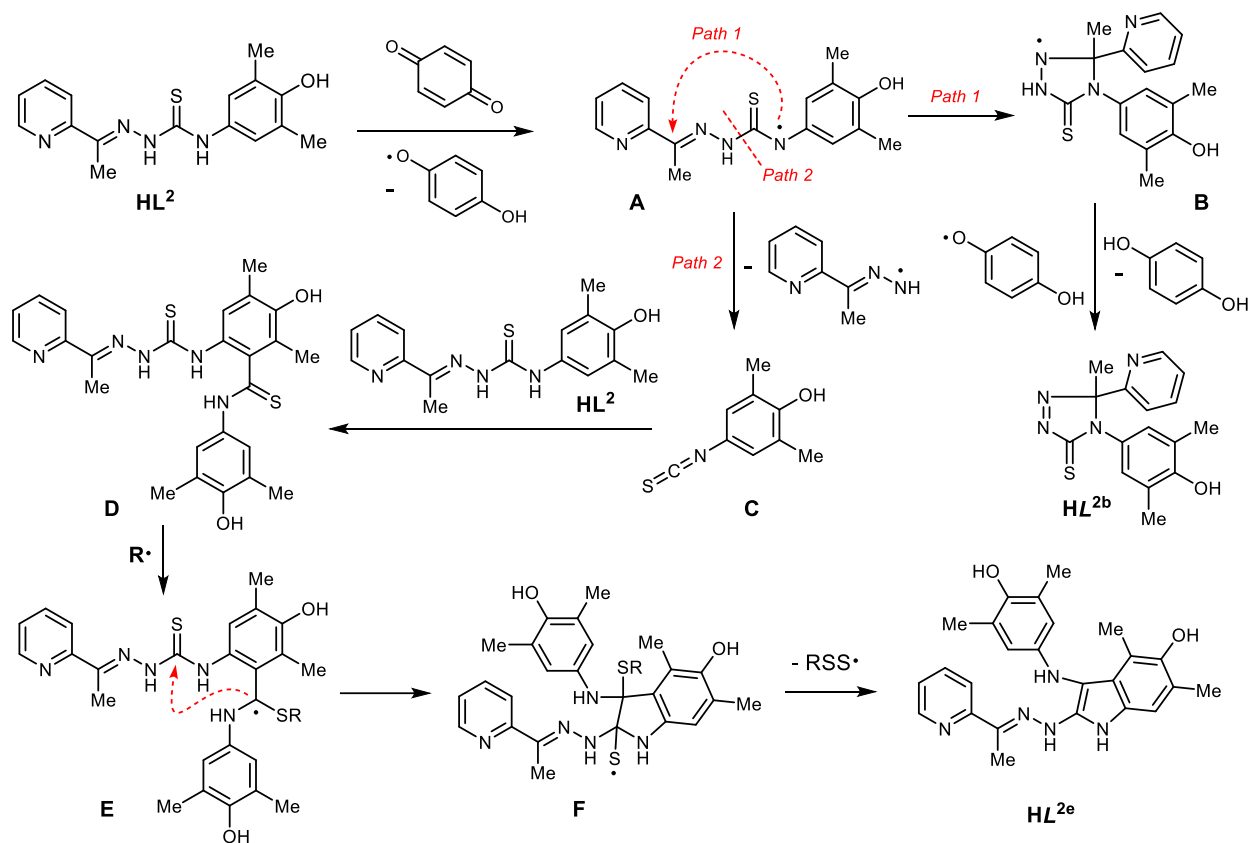

**Scheme S8.** Plausible pathway for the formation of compounds  $\text{HL}^{2b}$  and  $\text{HL}^{2e}$  by the oxidation of  $\text{HL}^2$  with PBQ.

**Discussion of Scheme S8.** We suppose that the initial step of the reaction of  $\text{HL}^2$  with PBQ involves one-electron oxidation of  $\text{HL}^2$  together with NH deprotonation to give a highly conjugated N/S-centered free radical species **A**. Intramolecular addition of the N4 atom in radical species **A** to the C=N double bond results in the triazole-based radical **B** which is then oxidized and deprotonated to form  $\text{HL}^{2b}$  (*Path 1*). Another transformation of radical **A** involves its fragmentation affording isothiocyanate **C** (*Path 2*). This path is supported by the literature data describing isothiocyanate syntheses by oxidation of thiosemicarbazides.<sup>18,19</sup> It should be also noted that formation of intermediate species **C** was observed upon oxidation of N-(4-hydroxy-3,5-dimethylphenyl)hydrazinecarbothioamide or  $\text{ATSC}'$  ( $\text{Ag}_2\text{O}$ , acetone), of  $\text{HL}^1$  ( $\text{Ag}_2\text{O}$ , acetone; PBQ in ethanol), DDQ in methanol) and confirmed by the negative ion ESI mass spectra showing a peak with  $m/z$  value 177.95 attributed to  $[\text{M}-\text{H}]^-$ . Moreover this species was separated by column chromatography on silica when using ethyl acetate/hexane (v/v 1/1,  $R_f = 0.85$ ). Electrophilic substitution in highly activated benzene ring of  $\text{HL}^2$  under the action of isothiocyanate **C** gives the



corresponding thioamide **D**. Analogous  $S_E2$  reactions have been described in the literature.<sup>20</sup> The final steps of indole  $HL^{2e}$  formation proceed presumably according to radical promoted Fukuyama-like indole synthesis.<sup>21,22</sup> Thus, the attack of a radical on the thioamide sulfur atom affords radical **E** followed by its cyclization into **F** and then aromatization to afford  $HL^{2e}$ .

**7. Suggested structures for  $[Cu(L^1)(H_2O)]^+$  and  $[Cu(HL^1)(H_2O)]^{2+}$**

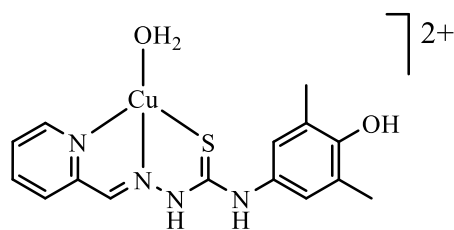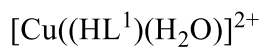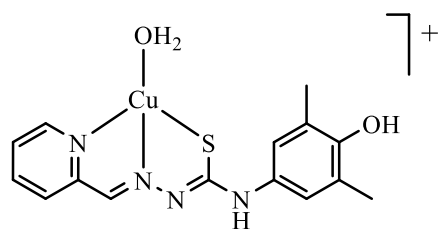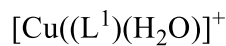

**Chart S1.** Suggested structures for  $[Cu(L^1)(H_2O)]^+$  and  $[Cu(HL^1)(H_2O)]^{2+}$  complexes. (Notably, the chloride ions originally coordinated in solid phase are most likely replaced by water molecules due to the weak binding of the chlorido ligands in aqueous solution).

## 8. Frontier orbitals in HL<sup>2</sup>

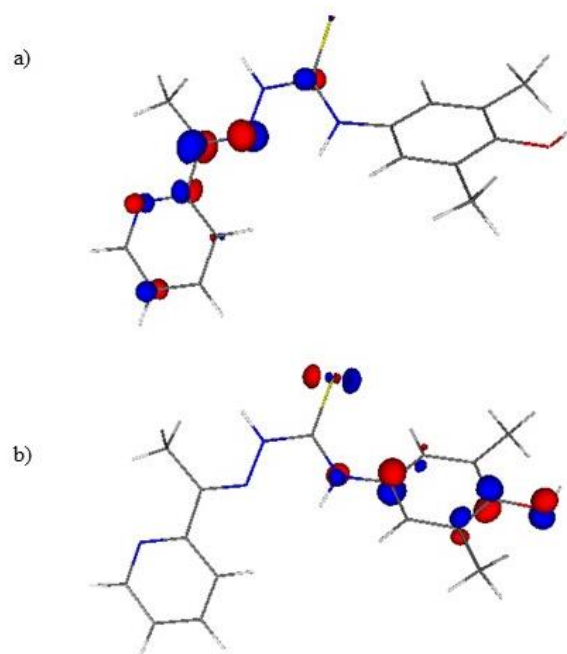

**Figure S1.** Frontier orbitals in HL<sup>2</sup>: a) LUMO and b) HOMO.

## 9. ORTEP view of the ATSC

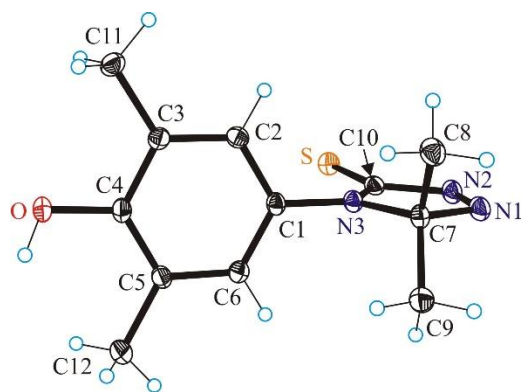

**Figure S2.** ORTEP view of the oxidation product of acetone *N*-(4-hydroxy-3,5-dimethylphenylthiosemicarbazone) (ATSC) by Ag<sub>2</sub>O.

## 10. *E/Z*-isomerization of $\text{HL}^{2c'}$

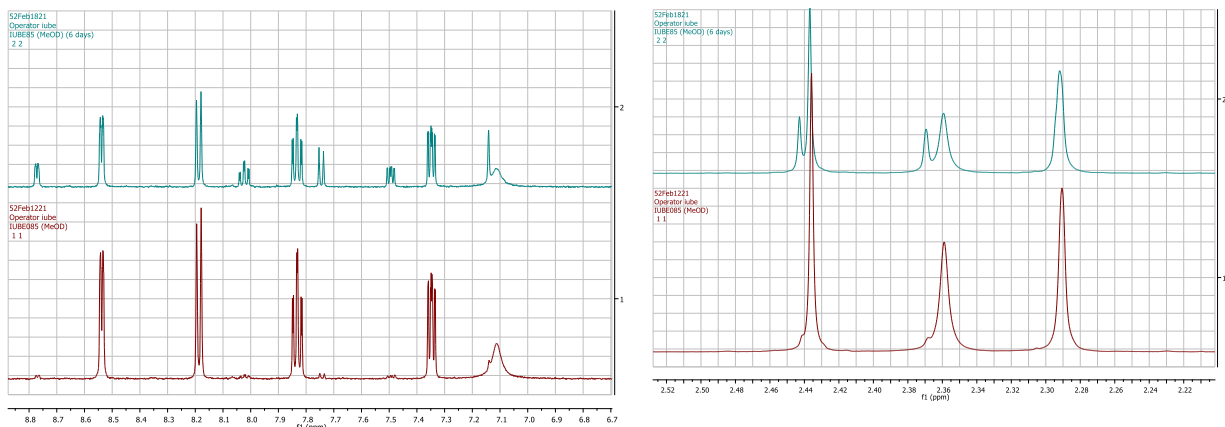

**Figure S3.** *E/Z*-isomerization of  $\text{HL}^{2c'}$  in  $\text{MeOH-}d_4$  in 6 days (red spectra – fresh (*E*-), blue spectra – in 6 days (*E/Z*- as 3/1)).

$^1\text{H}$  NMR ( $\text{HL}^{2c'}$ , 500 MHz,  $\text{MeOH-}d_4$ )  $\delta$  8.77 (ddd,  $J = 4.9, 1.7, 0.8$  Hz, 1H, *Z*-isomer), 8.54 (ddd,  $J = 4.9, 1.6, 0.9$  Hz, 3H, *E*-isomer), 8.19 (d,  $J = 8.1$  Hz, 3H, *E*-isomer), 8.02 (td,  $J = 7.9, 1.8$  Hz, 1H, *Z*-isomer), 7.83 (td,  $J = 7.8, 1.8$  Hz, 3H, *E*-isomer), 7.75 (d,  $J = 8.1$  Hz, 1H, *Z*-isomer), 7.49 (ddd,  $J = 7.6, 4.9, 0.9$  Hz, 1H, *Z*-isomer), 7.35 (ddd,  $J = 7.4, 4.9, 1.1$  Hz, 3H, *E*-isomer), 7.14 (s, 1H, *Z*-isomer), 7.11 (s, 3H, *E*-isomer), 2.44 (s, 3H, *Z*-isomer), 2.43 (s, 9H, *E*-isomer), 2.37 (s, 3H, *Z*-isomer), 2.36 (s, 9H, *E*-isomer), 2.29 (s, 3H+9H, *Z*-isomer and *E*-isomer).

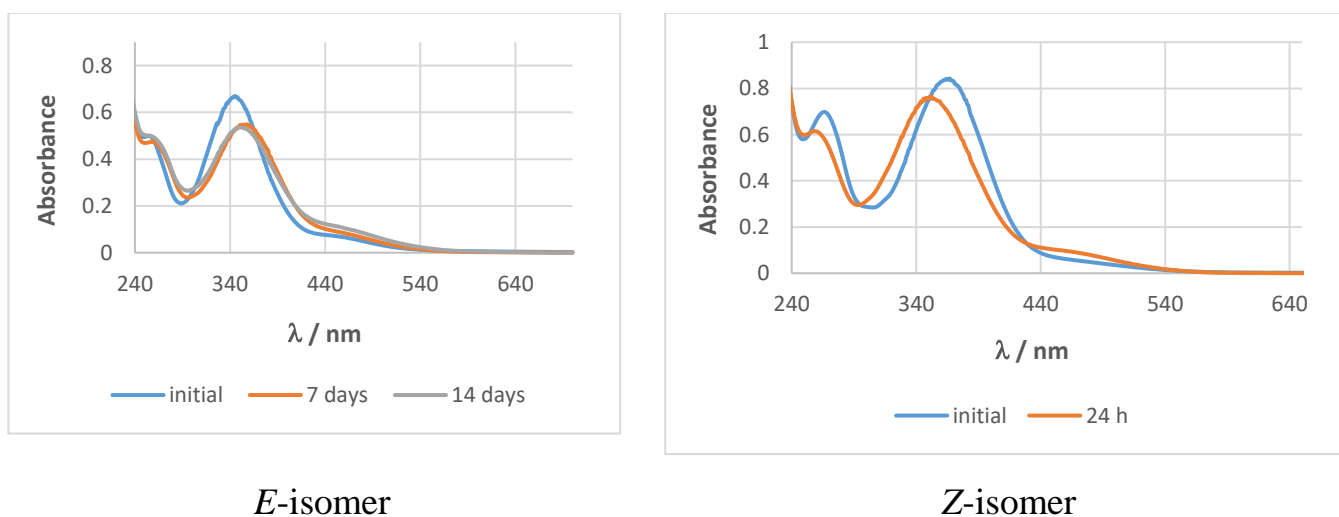

**Figure S4.** *E/Z*-isomerization of  $\text{HL}^{2c'}$  in  $\text{MeOH}$  investigated by UV–vis spectroscopy.

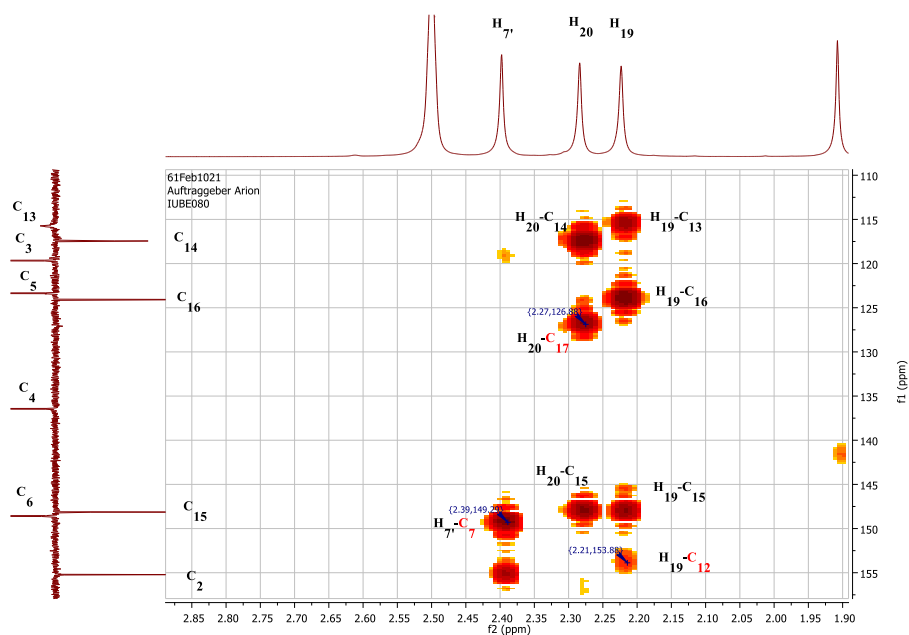

**Figure S5.** The fragment of  $^1\text{H},^{13}\text{C}$  HMBC of  $\text{HL}^{2c'} \cdot \text{CH}_3\text{COOH}$  (to assign carbons  $\text{C}_{12}$ ,  $\text{C}_7$  and  $\text{C}_{17}$ ).

### 11. ORTEP view of $\text{HL}^{2e}$ and $[\text{Cu}(\text{L}^{1c'})\text{Cl}]$ (4)

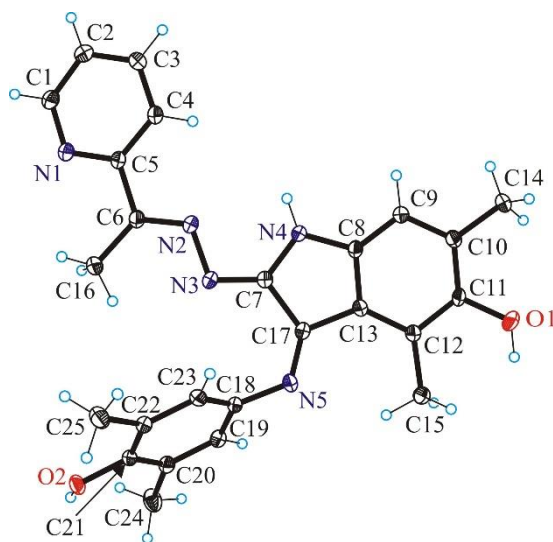

**Figure S6.** ORTEP view of  $\text{HL}^{2e}$  with thermal displacement parameters at 50% probability level. Selected bond distances ( $\text{\AA}$ ) and bond angles ( $^\circ$ ):  $\text{C}_6\text{--N}_2$  1.2908(13),  $\text{N}_2\text{--N}_3$  1.3999(12),  $\text{N}_3\text{--C}_7$  1.2987(13),  $\text{C}_7\text{--N}_4$  1.3656(12),  $\text{N}_4\text{--C}_8$  1.3969(12),  $\text{C}_8\text{--C}_{13}$  1.4006(14),  $\text{C}_{13}\text{--C}_{17}$  1.4763(13),  $\text{C}_{17}\text{--C}_7$  1.5149(14),  $\text{C}_{11}\text{--O}_1$  1.3812(12),  $\text{C}_{17}\text{--N}_5$  1.2861(13),  $\text{N}_5\text{--C}_{18}$  1.4150(12),  $\text{C}_{21}\text{--O}_2$  1.3729(11).

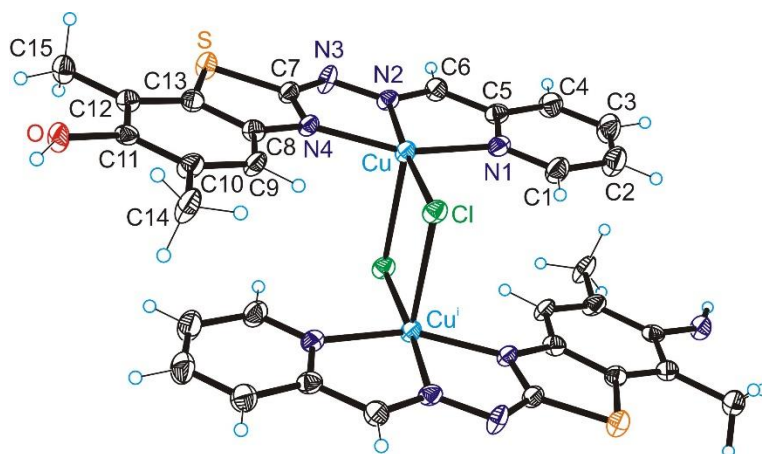

**Figure S7.** ORTEP view of centrosymmetric dimer in  $[\text{Cu}(\text{L}^{1c})\text{Cl}]$  (**4**) with thermal ellipsoids at 50% probability level. Bond lengths to bridging  $\mu$ -chlorido ligands:  $\text{Cu}-\text{Cl} = 2.2575(12)$  Å,  $\text{Cu}-\text{Cl}^i = 2.7633(13)$  Å; (i denotes equivalent atom generated by symmetry transformation  $-x + 1, -y + 1, -z + 1$ ).

## 12. Spectroscopic data

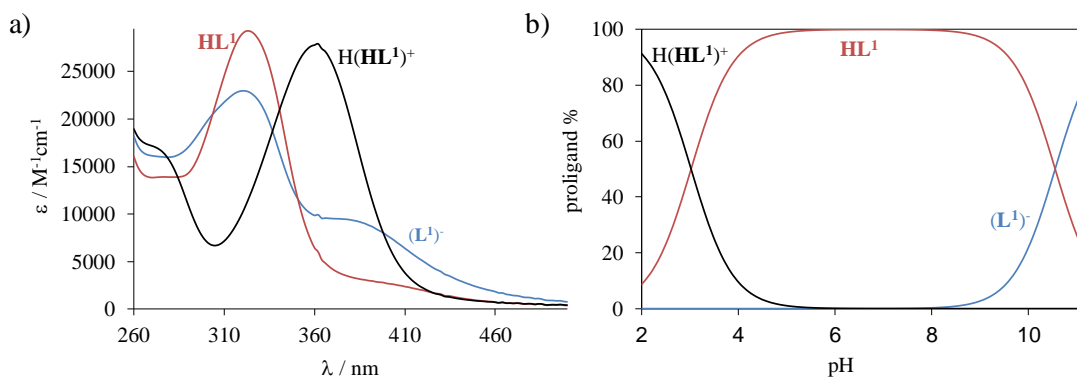

**Figure S8.** a) Molar absorbance spectra of the metal-free ligand  $\text{HL}^1$  in different protonation states. b) Concentration distribution curves for  $\text{H}(\text{HL}^1)^+$ ,  $\text{HL}^1$  and  $(\text{L}^1)^-$ .  $\{c_{\text{HL}} = 50 \mu\text{M}; 30\% \text{ (v/v) DMSO}/\text{H}_2\text{O}; I = 0.1 \text{ M (KCl)}; T = 25 \text{ }^\circ\text{C}\}$

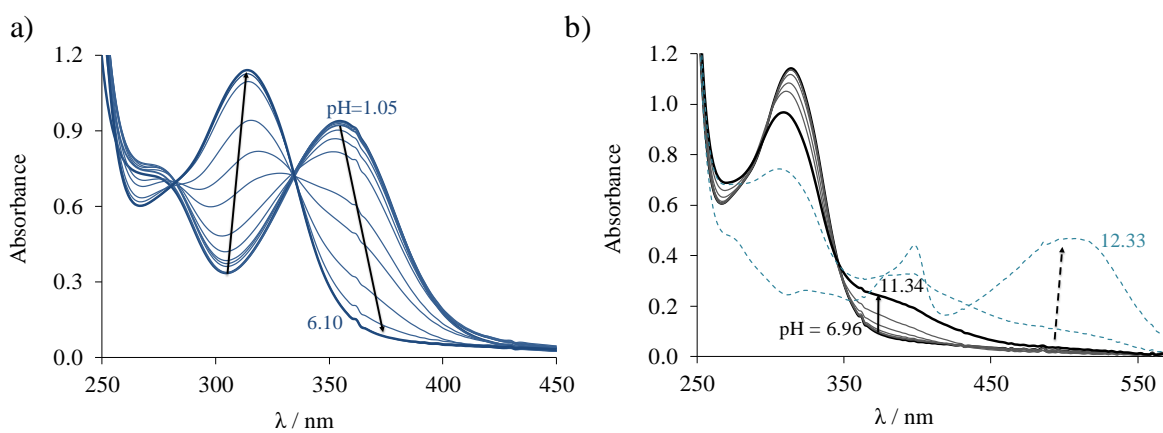

**Figure S9.** UV-vis absorption spectra recorded for proligand **HL<sup>2</sup>** in the pH range a) 1.05 – 6.10 and b) 6.96 – 12.33. { $c_{\text{HL}} = 50 \mu\text{M}$ ; 30% (v/v) DMSO/H<sub>2</sub>O;  $I = 0.1 \text{ M}$  (KCl);  $T = 25 \text{ }^\circ\text{C}$ }.

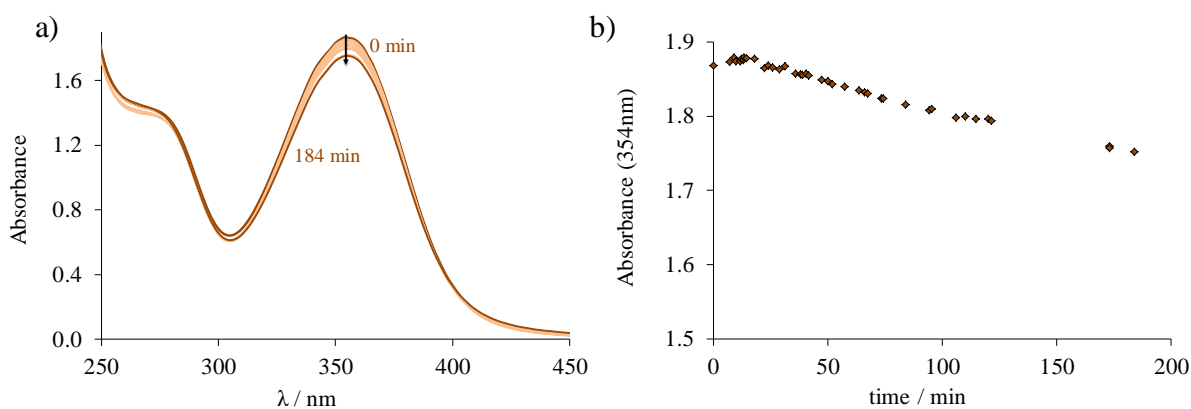

**Figure S10.** a) UV-vis absorption spectra recorded for proligand **HL<sup>2</sup>** at pH 1.5 over 3 h. b) Absorbance values at 354 nm plotted against the time. { $c_{\text{HL}} = 100 \mu\text{M}$ ; 30% (v/v) DMSO/H<sub>2</sub>O;  $I = 0.1 \text{ M}$  (KCl);  $T = 25 \text{ }^\circ\text{C}$ }.

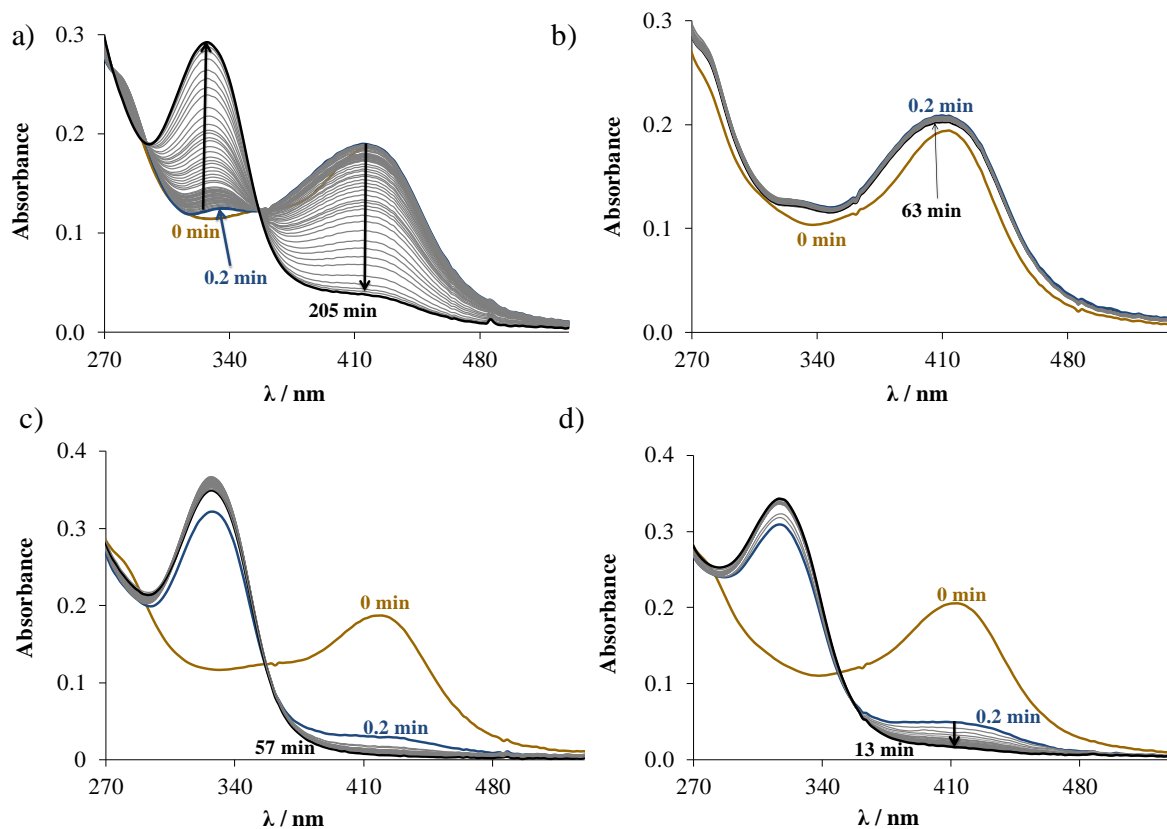

**Figure S11.** Time dependent changes of the UV–vis spectra of a)  $\text{Cu}(\text{HL}^1)\text{Cl}_2$  and b)  $\text{Cu}(\text{L}^2)\text{Cl}$  in the presence of 50 equiv GSH, c)  $\text{Cu}(\text{HL}^1)\text{Cl}_2$  and d)  $\text{Cu}(\text{L}^2)\text{Cl}$  in the presence of 50 equiv DTT, at pH 7.4 in 60% (v/v) DMSO/ $\text{H}_2\text{O}$  under anaerobic conditions  $\{c_{\text{complex}} = 12.5 \mu\text{M}; c_{\text{GSH}}$  or  $c_{\text{DTT}} = 600 \mu\text{M}; \text{pH} = 7.40; I = 0.1 \text{ M (KCl)}; T = 25 \text{ }^\circ\text{C}\}$ .

### 13. Spectroelectrochemical data

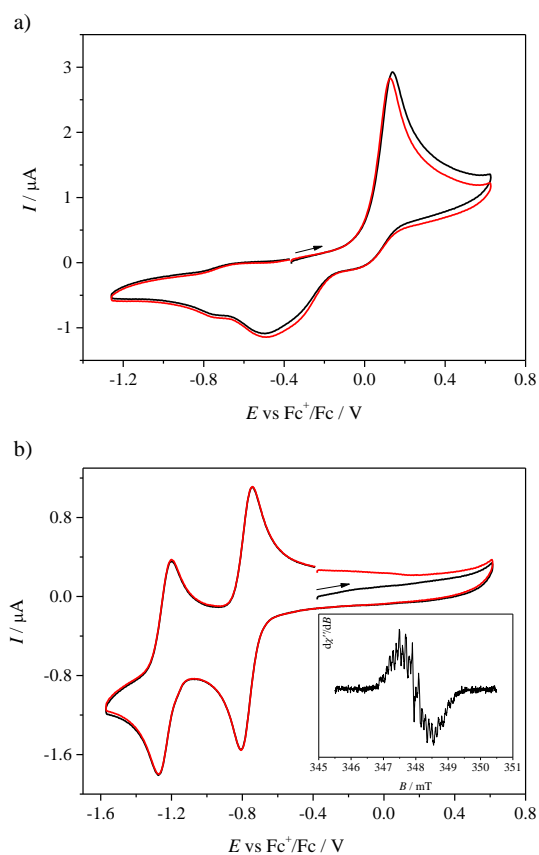

**Figure S12.** Cyclic voltammograms of a) 0.5 mM  $\text{HL}^{1a'}$  and b)  $\text{HL}^{1a''}$  in DMSO/ $n\text{-Bu}_4\text{NPF}_6$  at glassy-carbon working electrode at scan rate of  $100 \text{ mV s}^{-1}$ . Inset in b): EPR spectrum measured upon cathodic reduction of  $\text{HL}^{1a''}$  at the first reduction peak.



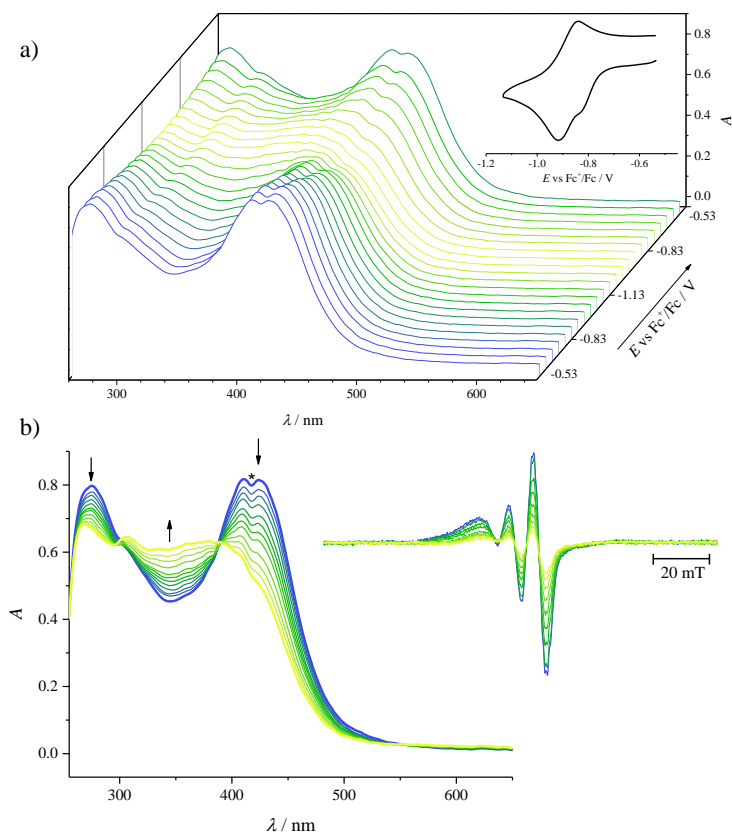

**Figure S13.** Spectroelectrochemistry of **2'** in  $n\text{-Bu}_4\text{NPF}_6/\text{DMSO}$  in the region of the first cathodic peak. a) Potential dependence of UV–vis spectra with the corresponding in situ cyclic voltammogram (Pt-microstructured honeycomb working electrode, scan rate of  $5 \text{ mV s}^{-1}$ ); b) evolution of UV–vis spectra in 2D projection upon forward scan (\* the peak marked by an asterisk is due to an artefact caused by the instrument; inset: evolution of EPR spectra measured at the first reduction peak using Pt mesh working electrode).

## 14. EPR measurement

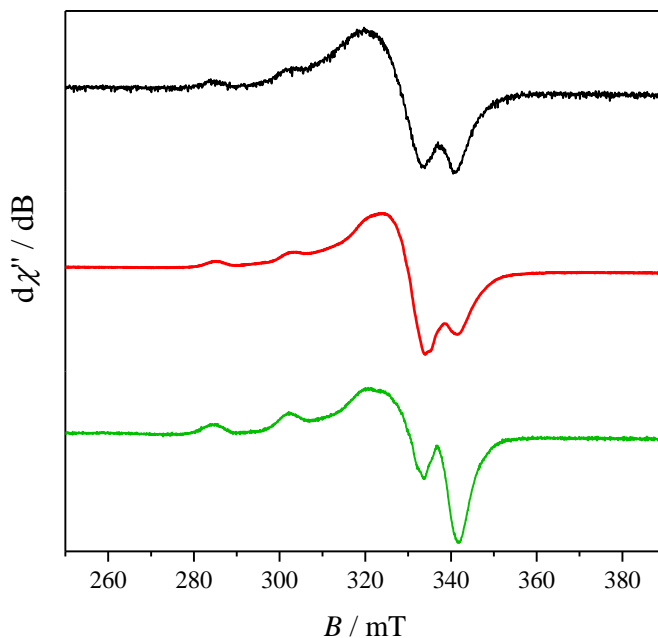

**Figure S14.** EPR spectra of **1** (black trace), **2'** (red trace) and **3** (green trace) measured in frozen  $n\text{-Bu}_4\text{NPF}_6/\text{DMSO}$  at 77 K.

## 15. Tyrosyl radical reduction kinetics in mouse R2 RNR protein

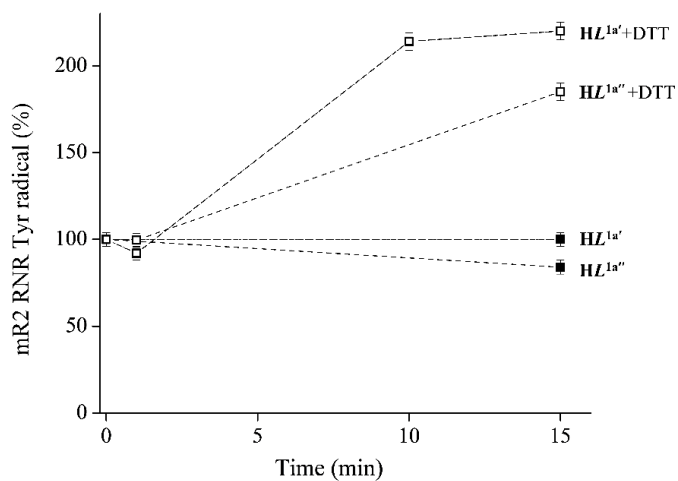

**Figure S15.** Tyrosyl radical reduction kinetics in mouse R2 RNR protein by **HL<sup>1a'</sup>** and **HL<sup>1a''</sup>**, in absence and presence of an external reductant, measured by 30 K EPR spectroscopy. The samples contained 20  $\mu\text{M}$  mR2 in 50 mM HEPES buffer, pH 7.60 / 100 mM KCl, 20  $\mu\text{M}$  compound in 1% (v/v) DMSO/H<sub>2</sub>O, and 2 mM dithiothreitol (DTT).

## 16. Cell cycle arrest

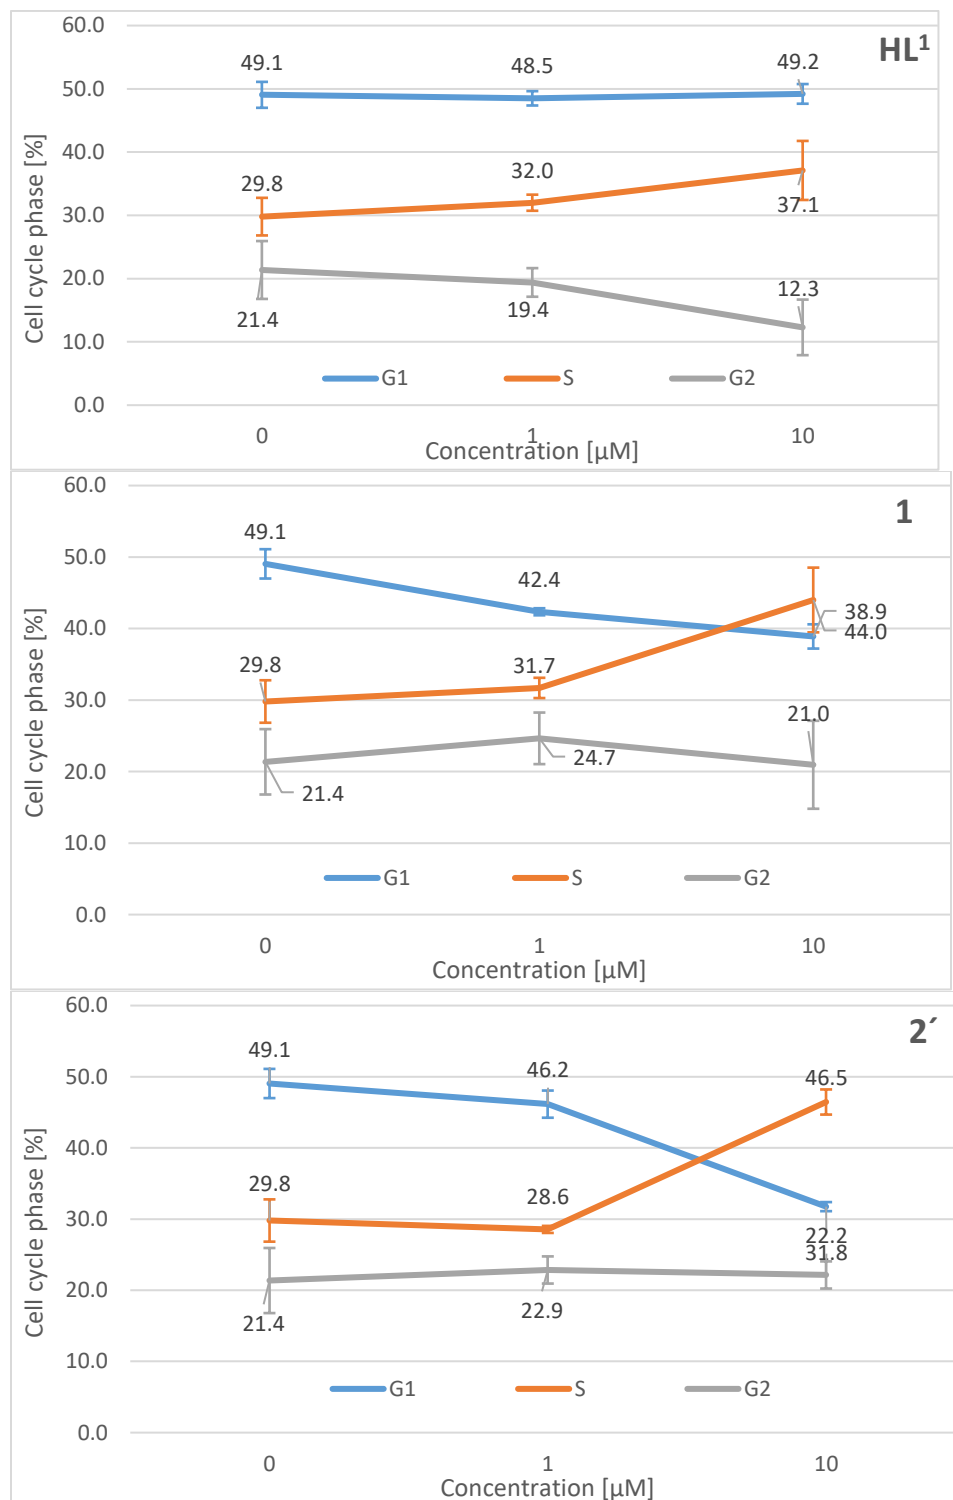

**Figure S16.** Cell cycle distribution of SW480 cells induced by increased concentrations of **HL<sup>1</sup>** (top) and complexes **1** (middle) and **2'** (bottom) for 24 h compared to negative control (DMSO).

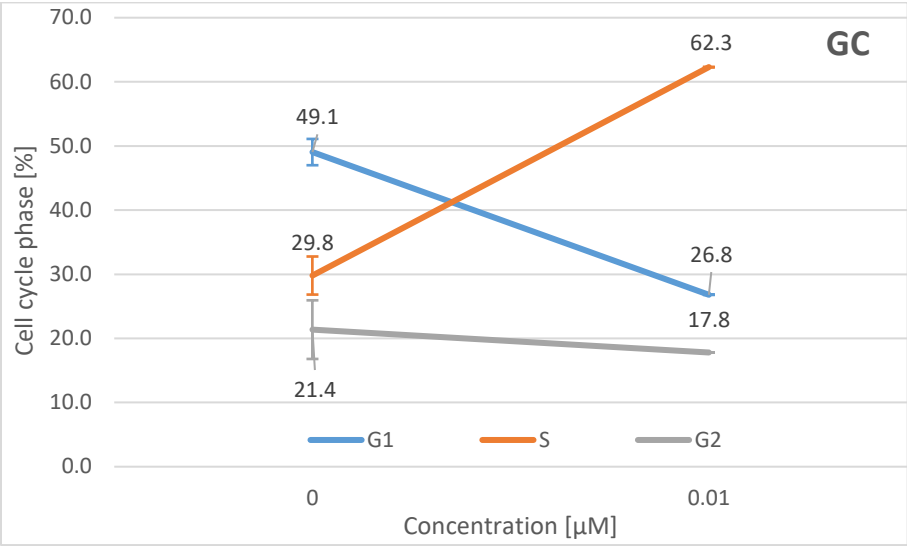

**Figure S17.** Cell cycle distribution of SW480 cells induced by increased concentrations of Gemcitabine (GC) for 24 h compared to negative control (DMSO).

## 17. Crystal Data and Details of Data Collection

**Table S1.** Crystal Data and Details of Data Collection for **HL<sup>1</sup>**·C<sub>2</sub>H<sub>5</sub>OH, **HL<sup>2</sup>** and **HL<sup>3</sup>**

| Compound                                   | <b>HL<sup>1</sup></b> ·C <sub>2</sub> H <sub>5</sub> OH         | <b>HL<sup>2</sup></b>                             | <b>HL<sup>3</sup></b>                             |
|--------------------------------------------|-----------------------------------------------------------------|---------------------------------------------------|---------------------------------------------------|
| empirical formula                          | C <sub>17</sub> H <sub>22</sub> N <sub>4</sub> O <sub>2</sub> S | C <sub>16</sub> H <sub>18</sub> N <sub>4</sub> OS | C <sub>15</sub> H <sub>17</sub> N <sub>5</sub> OS |
| fw                                         | 346.45                                                          | 314.40                                            | 315.40                                            |
| space group                                | triclinic, <i>P</i> $\bar{1}$                                   | monoclinic, <i>P</i> 2 <sub>1</sub> / <i>c</i>    | monoclinic, <i>P</i> 2 <sub>1</sub> / <i>c</i>    |
| <i>a</i> , Å                               | 8.0232 (4)                                                      | 7.4870 (11)                                       | 14.7916 (7)                                       |
| <i>b</i> , Å                               | 10.4578 (6)                                                     | 8.6775 (15)                                       | 13.1867 (7)                                       |
| <i>c</i> , Å                               | 11.2363 (5)                                                     | 24.709 (5)                                        | 15.9256 (8)                                       |
| $\alpha$ , °                               | 76.4523 (19)                                                    | 90                                                | 90                                                |
| $\beta$ , °                                | 74.485 (3)                                                      | 90.387 (6)                                        | 105.1976 (19)                                     |
| $\gamma$ , °                               | 82.121 (2)                                                      | 90                                                | 90                                                |
| <i>V</i> [Å <sup>3</sup> ]                 | 880.36 (8)                                                      | 1605.3 (5)                                        | 2997.7 (3)                                        |
| <i>Z</i>                                   | 2                                                               | 4                                                 | 8                                                 |
| $\lambda$ [Å]                              | 0.71073                                                         | 0.71073                                           | 0.71073                                           |
| $\rho_{\text{calcd}}$ , g cm <sup>-3</sup> | 1.307                                                           | 1.301                                             | 1.398                                             |
| cryst size, mm <sup>3</sup>                | 0.10 × 0.09 × 0.04                                              | 0.10 × 0.08 × 0.01                                | 0.20 × 0.10 × 0.08                                |
| <i>T</i> [K]                               | 110(2)                                                          | 120(2)                                            | 120(2)                                            |
| $\mu$ , mm <sup>-1</sup>                   | 0.201                                                           | 0.209                                             | 0.226                                             |
| <i>R</i> <sub>1</sub> <sup>a</sup>         | 0.0347                                                          | 0.0570                                            | 0.0562                                            |
| <i>wR</i> <sub>2</sub> <sup>b</sup>        | 0.0827                                                          | 0.1871                                            | 0.1526                                            |
| GOF <sup>c</sup>                           | 1.047                                                           | 1.072                                             | 1.008                                             |

<sup>a</sup>  $R_1 = \Sigma||F_o| - |F_c||/\Sigma|F_o|$ . <sup>b</sup>  $wR_2 = \{\Sigma[w(F_o^2 - F_c^2)^2]/\Sigma[w(F_o^2)^2]\}^{1/2}$ . <sup>c</sup> GOF =  $\{\Sigma[w(F_o^2 - F_c^2)^2]/(n - p)\}^{1/2}$ , where *n* is the number of reflections and *p* is the total number of parameters refined.

**Table S2.** Crystal Data and Details of Data Collection for **HL<sup>1a'</sup>**, **HL<sup>1a''</sup>**, **HL<sup>2b</sup>**, **HL<sup>2e</sup>** and **ATSC'**

| Compound                                   | <b>HL<sup>1a'</sup></b>                           | <b>HL<sup>1a''</sup></b>                          | <b>HL<sup>2b</sup></b>                            | <b>HL<sup>2c''</sup>·0.5CHCl<sub>3</sub></b>                            | <b>HL<sup>2e</sup></b>                                        | <b>ATSC'</b>                                      |
|--------------------------------------------|---------------------------------------------------|---------------------------------------------------|---------------------------------------------------|-------------------------------------------------------------------------|---------------------------------------------------------------|---------------------------------------------------|
| empirical formula                          | C <sub>15</sub> H <sub>14</sub> N <sub>4</sub> OS | C <sub>15</sub> H <sub>12</sub> N <sub>4</sub> OS | C <sub>16</sub> H <sub>18</sub> N <sub>4</sub> OS | C <sub>16.5</sub> H <sub>14.5</sub> Cl <sub>1.5</sub> N <sub>4</sub> OS | C <sub>25</sub> H <sub>25</sub> N <sub>5</sub> O <sub>2</sub> | C <sub>12</sub> H <sub>15</sub> N <sub>3</sub> OS |
| fw                                         | 298.36                                            | 296.35                                            | 314.40                                            | 370.06                                                                  | 427.50                                                        | 249.33                                            |
| space group                                | monoclinic, <i>P2<sub>1</sub>/n</i>               | monoclinic, <i>Cc</i>                             | monoclinic, <i>P2<sub>1</sub>/c</i>               | triclinic, <i>P-1</i>                                                   | triclinic, <i>P<math>\bar{1}</math></i>                       | monoclinic, <i>P2<sub>1</sub>/n</i>               |
| <i>a</i> , Å                               | 13.7285(3)                                        | 22.449(2)                                         | 7.5533(4)                                         | 8.5138(3)                                                               | 9.8871(7)                                                     | 12.3755(3)                                        |
| <i>b</i> , Å                               | 4.8713(1)                                         | 3.8288(4)                                         | 20.6597(10)                                       | 11.0999(5)                                                              | 10.8202(5)                                                    | 7.2202(2)                                         |
| <i>c</i> , Å                               | 20.8797(4)                                        | 16.289(3)                                         | 9.5891(7)                                         | 17.9548(6)                                                              | 11.9861(5)                                                    | 13.9172(4)                                        |
| $\alpha$ , °                               |                                                   |                                                   |                                                   | 85.5846(15)                                                             | 116.4987(18)                                                  |                                                   |
| $\beta$ , °                                | 106.100(1)                                        | 100.513(6)                                        | 91.511(3)                                         | 87.0782(14)                                                             | 92.850(2)                                                     | 91.824(1)                                         |
| $\gamma$ , °                               |                                                   |                                                   |                                                   | 89.039(3)                                                               | 106.217(3)                                                    |                                                   |
| <i>V</i> [Å <sup>3</sup> ]                 | 1341.58(5)                                        | 1376.5(3)                                         | 1495.85(15)                                       | 1689.39(11)                                                             | 1078.99(10)                                                   | 1242.92(6)                                        |
| <i>Z</i>                                   | 4                                                 | 4                                                 | 4                                                 | 4                                                                       | 2                                                             | 4                                                 |
| $\lambda$ [Å]                              | 0.71073                                           | 0.71073                                           | 0.71073                                           | 0.71073                                                                 | 0.71073                                                       | 0.71073                                           |
| $\rho_{\text{calcd}}$ , g cm <sup>-3</sup> | 1.477                                             | 1.430                                             | 1.387                                             | 1.455                                                                   | 1.316                                                         | 1.332                                             |
| cryst size, mm <sup>3</sup>                | 0.35 × 0.23 × 0.01                                | 0.09 × 0.06 × 0.03                                | 0.14 × 0.13 × 0.08                                | 0.20 × 0.15 × 0.01                                                      | 0.23 × 0.20 × 0.09                                            | 0.62 × 0.55 × 0.13                                |
| <i>T</i> [K]                               | 100(2)                                            | 100(2)                                            | 100(2)                                            | 125(2)                                                                  | 100(2)                                                        | 100(2)                                            |
| $\mu$ , mm <sup>-1</sup>                   | 0.246                                             | 0.239                                             | 0.224                                             | 0.440                                                                   | 0.086                                                         | 0.248                                             |
| <i>R</i> <sub>1</sub> <sup>a</sup>         | 0.0355                                            | 0.0314                                            | 0.0466                                            | 0.0581                                                                  | 0.0456                                                        | 0.0323                                            |
| <i>wR</i> <sub>2</sub> <sup>b</sup>        | 0.0932                                            | 0.0724                                            | 0.1174                                            | 0.1653                                                                  | 0.1360                                                        | 0.0843                                            |
| GOF <sup>c</sup>                           | 1.090                                             | 1.026                                             | 1.055                                             | 1.069                                                                   | 1.046                                                         | 1.064                                             |

<sup>a</sup>  $R_1 = \Sigma||F_o| - |F_c||/\Sigma|F_o|$ . <sup>b</sup>  $wR_2 = \{\Sigma[w(F_o^2 - F_c^2)^2]/\Sigma[w(F_o^2)^2]\}^{1/2}$ . <sup>c</sup> GOF =  $\{\Sigma[w(F_o^2 - F_c^2)^2]/(n - p)\}^{1/2}$ , where *n* is the number of reflections and *p* is the total number of parameters refined.

**Table S3.** Crystal Data and Details of Data Collection for **1'**·CH<sub>3</sub>OH, **2'**, **3'**·CH<sub>3</sub>OH, **4–6**

| Compound                                   | <b>1'</b> ·CH <sub>3</sub> OH                                       | <b>2'</b>                                             | <b>3'</b> ·CH <sub>3</sub> OH                                       | <b>4</b>                                              | <b>5</b>                                                                          | <b>6</b>                                                                          |
|--------------------------------------------|---------------------------------------------------------------------|-------------------------------------------------------|---------------------------------------------------------------------|-------------------------------------------------------|-----------------------------------------------------------------------------------|-----------------------------------------------------------------------------------|
| empirical formula                          | C <sub>16</sub> H <sub>19</sub> N <sub>4</sub> O <sub>2</sub> SCuCl | C <sub>16</sub> H <sub>17</sub> N <sub>4</sub> OSCuCl | C <sub>16</sub> H <sub>20</sub> N <sub>5</sub> O <sub>2</sub> SCuCl | C <sub>15</sub> H <sub>13</sub> N <sub>4</sub> OSCuCl | C <sub>14</sub> H <sub>16</sub> Cl <sub>2</sub> CuN <sub>8</sub> O <sub>2</sub> S | C <sub>17</sub> H <sub>20</sub> Cl <sub>2</sub> CuN <sub>4</sub> O <sub>2</sub> S |
| fw                                         | 430.40                                                              | 412.39                                                | 445.42                                                              | 396.34                                                | 526.91                                                                            | 478.87                                                                            |
| space group                                | monoclinic, <i>P2<sub>1</sub>/c</i>                                 | triclinic, <i>P1̄</i>                                 | monoclinic, <i>P2<sub>1</sub>/c</i>                                 | monoclinic, <i>P2<sub>1</sub>/c</i>                   | monoclinic, <i>P2<sub>1</sub>/n</i>                                               | triclinic, <i>P1̄</i>                                                             |
| <i>a</i> , Å                               | 14.0310(5)                                                          | 7.3880(15)                                            | 13.9941 (10)                                                        | 8.8847(16)                                            | 9.8513(2)                                                                         | 8.4395(5)                                                                         |
| <i>b</i> , Å                               | 6.7988(2)                                                           | 8.6970(17)                                            | 9.6773 (4)                                                          | 18.122(2)                                             | 8.12370(10)                                                                       | 10.9171(13)                                                                       |
| <i>c</i> , Å                               | 18.4126(6)                                                          | 13.884(3)                                             | 14.0005 (9)                                                         | 9.2690(17)                                            | 12.6408(2)                                                                        | 11.1165(7)                                                                        |
| $\alpha$ , °                               |                                                                     | 84.84(3)                                              |                                                                     |                                                       |                                                                                   | 79.343(4)                                                                         |
| $\beta$ , °                                | 91.286(3)                                                           | 87.45(3)                                              | 103.980 (3)                                                         | 92.814(6)                                             | 101.7347(8)                                                                       | 86.602(2)                                                                         |
| $\gamma$ , °                               |                                                                     | 68.64(3)                                              |                                                                     |                                                       |                                                                                   | 71.706(4)                                                                         |
| <i>V</i> [Å <sup>3</sup> ]                 | 1756.01(10)                                                         | 827.4(3)                                              | 1839.86 (19)                                                        | 1490.5(4)                                             | 990.49(3)                                                                         | 955.68(14)                                                                        |
| <i>Z</i>                                   | 4                                                                   | 2                                                     | 4                                                                   | 4                                                     | 2                                                                                 | 2                                                                                 |
| $\lambda$ [Å]                              | 0.71073                                                             | 0.70000                                               | 0.71073                                                             | 0.71073                                               | 0.71073                                                                           | 0.71073                                                                           |
| $\rho_{\text{calcd}}$ , g cm <sup>-3</sup> | 1.628                                                               | 1.655                                                 | 1.608                                                               | 1.766                                                 | 1.767                                                                             | 1.664                                                                             |
| cryst size, mm <sup>3</sup>                | 0.12 × 0.12 × 0.03                                                  | 0.05 × 0.02 × 0.01                                    | 0.09 × 0.09 × 0.02                                                  | 0.15 × 0.03 × 0.02                                    | 0.19 × 0.13 × 0.08                                                                | 0.06 × 0.05 × 0.04                                                                |
| <i>T</i> [K]                               | 120(2)                                                              | 100(2)                                                | 120(2)                                                              | 100(2)                                                | 100(2)                                                                            | 100(2)                                                                            |
| $\mu$ , mm <sup>-1</sup>                   | 1.533                                                               | 1.556                                                 | 1.467                                                               | 1.793                                                 | 1.614                                                                             | 1.553                                                                             |
| <i>R</i> <sub>1</sub> <sup>a</sup>         | 0.0369                                                              | 0.0659                                                | 0.0348                                                              | 0.0477                                                | 0.0238                                                                            | 0.0283                                                                            |
| <i>wR</i> <sub>2</sub> <sup>b</sup>        | 0.0951                                                              | 0.1999                                                | 0.0802                                                              | 0.1116                                                | 0.0599                                                                            | 0.0668                                                                            |
| GOF <sup>c</sup>                           | 1.089                                                               | 1.060                                                 | 1.054                                                               | 1.054                                                 | 1.078                                                                             | 1.058                                                                             |

<sup>a</sup>  $R_1 = \Sigma||F_o| - |F_c||/\Sigma|F_o|$ . <sup>b</sup>  $wR_2 = \{\Sigma[w(F_o^2 - F_c^2)^2]/\Sigma[w(F_o^2)^2]\}^{1/2}$ . <sup>c</sup>  $GOF = \{\Sigma[w(F_o^2 - F_c^2)^2]/(n - p)\}^{1/2}$ , where *n* is the number of reflections and *p* is the total number of parameters refined.

## 18. <sup>1</sup>H and <sup>13</sup>C NMR Data

**Table S4.** <sup>1</sup>H NMR (DMSO-*d*<sub>6</sub>)

|                                  |                       | <b>HL<sup>1</sup> (E-)</b> | <b>HL<sup>2</sup> (E-)</b> | <b>HL<sup>3</sup> (E-)</b> | <b>HL<sup>1a'</sup></b> | <b>HL<sup>1a''</sup></b>                                           | <b>HL<sup>2c'</sup>:CH<sub>3</sub>COOH (E-)</b>                  | <b>HL<sup>2c'</sup> (E-)</b>                                     | <b>HL<sup>2c''</sup> (CDCl<sub>3</sub>)</b>                      |
|----------------------------------|-----------------------|----------------------------|----------------------------|----------------------------|-------------------------|--------------------------------------------------------------------|------------------------------------------------------------------|------------------------------------------------------------------|------------------------------------------------------------------|
| H <sub>3</sub>                   | CH <sub>py</sub>      | 8.43 (d, 1H)               | 8.54 (d, 1H)               | -                          | 8.11 (d, 1H)            | 8.26 (dt, 1H)                                                      | 8.08 (d, 1H)                                                     | 8.07 (d, 1H)                                                     | 8.34 (d, 1H)                                                     |
| H <sub>3'</sub>                  | NH <sub>2</sub>       | -                          | -                          | 6.49 (s, 2H)               | -                       | -                                                                  | -                                                                | -                                                                | -                                                                |
| H <sub>4</sub>                   | CH <sub>py</sub>      | 7.82 (td, 1H)              | 7.79 (td, 1H)              | 7.15 (dd, 1H)              | 7.95 (td, 1H)           | 8.06 (td, 1H)                                                      | 7.85 (td, 1H)                                                    | 7.85 (td, 1H)                                                    | 7.80 (td, 1H)                                                    |
| H <sub>5</sub>                   | CH <sub>py</sub>      | 7.37 (m, 1H)               | 7.39 (dd, 1H)              | 7.08 (dd, 1H)              | 7.46 (ddd, 1H)          | 7.60 (ddd, 1H)                                                     | 7.36 (dd, 1H)                                                    | 7.36 (ddd, 1H)                                                   | 7.38 (dd, 1H)                                                    |
| H <sub>6</sub>                   | CH <sub>py</sub>      | 8.57 (d, 1H)               | 8.59 (d, 1H)               | 7.85 (dd, 1H)              | 8.61 (d, 1H)            | 8.71 (ddd, 1H)                                                     | 8.58 (d, 1H)                                                     | 8.58 (ddd, 1H)                                                   | 8.70 (d, 1H)                                                     |
| H <sub>7</sub>                   | CH=N                  | 8.16 (s, 1H)               | -                          | 8.39 (s, 1H)               | -                       | -                                                                  | -                                                                | -                                                                | -                                                                |
| H <sub>7'</sub>                  | CH <sub>3</sub> (C=N) | -                          | 2.44 (s, 3H)               | -                          | -                       | -                                                                  | 2.40 (s, 3H)                                                     | 2.40 (s, 3H)                                                     | 2.72 (s, 3H)                                                     |
| H <sub>9</sub>                   | NH (closer to py)     | 11.86 (s, 1H)              | 10.46 (s, 1H)              | 11.47 (s, 1H)              | -                       | -                                                                  | 11.76 (s, 1H)                                                    | 11.58 (s, 1H)                                                    | -                                                                |
| H <sub>11</sub>                  | NH (closer to ph)     | 10.00 (s, 1H)              | 9.94 (s, 1H)               | 9.70 (s, 1H)               | 10.20 (s, 1H)           | -                                                                  | -                                                                | -                                                                | -                                                                |
| H <sub>13</sub> +H <sub>17</sub> | CH <sub>ph</sub>      | 7.02 (s, 2H)               | 7.02 (s, 2H)               | 6.92 (s, 2H)               | 7.16 (s, 2H)            | 7.46 (dq, 1H, H <sub>13</sub> )<br>7.20 (dq, 1H, H <sub>17</sub> ) | 7.02 (s, 1H, H <sub>13</sub> )                                   | 7.02 (brs, 1H)                                                   | 7.44 (brs, 1H)                                                   |
| H <sub>18</sub>                  | OH <sub>ph</sub>      | 8.22 (s, 1H)               | 8.22 (s, 1H)               | 8.21 (s, 1H)               | 8.08 (s, 1H)            | -                                                                  | 8.18 (s, 1H)                                                     | 8.20 (s, 1H)                                                     | -                                                                |
| H <sub>19</sub> +H <sub>20</sub> | CH <sub>3ph</sub>     | 2.17 (s, 6H)               | 2.17 (s, 6H)               | 2.16 (s, 6H)               | 2.17 (s, 6H)            | 2.05 (d, 3H, H <sub>20</sub> )<br>2.00 (d, 3H, H <sub>19</sub> )   | 2.28 (s, 3H, H <sub>20</sub> )<br>2.22 (s, 3H, H <sub>19</sub> ) | 2.28 (s, 3H, H <sub>20</sub> )<br>2.22 (s, 3H, H <sub>19</sub> ) | 2.18 (s, 3H, H <sub>19</sub> )<br>2.14 (s, 3H, H <sub>20</sub> ) |

|                                  |                       | <b>HL<sup>1</sup> (Z-)</b> | <b>HL<sup>2</sup> (Z-)</b> | <b>HL<sup>3</sup> (Z-)</b> | <b>HL<sup>2c'</sup> (Z-)</b>                                     |
|----------------------------------|-----------------------|----------------------------|----------------------------|----------------------------|------------------------------------------------------------------|
| H <sub>3</sub>                   | CH <sub>py</sub>      | n.a.                       | n.a.                       | n.a.                       | 7.79 (d, 1H)                                                     |
| H <sub>3'</sub>                  | NH <sub>2</sub>       | -                          | -                          | 6.21 (s, 2H)               | -                                                                |
| H <sub>4</sub>                   | CH <sub>py</sub>      | n.a.                       | n.a.                       | n.a.                       | 8.08 (t, 1H)                                                     |
| H <sub>5</sub>                   | CH <sub>py</sub>      | n.a.                       | n.a.                       | n.a.                       | 7.58 (m, 1H)                                                     |
| H <sub>6</sub>                   | CH <sub>py</sub>      | n.a.                       | n.a.                       | n.a.                       | 8.85 (d, 1H)                                                     |
| H <sub>7'</sub>                  | CH <sub>3</sub> (C=N) | -                          | 2.43 (s, 3H)               | -                          | 2.40 (s, 3H)                                                     |
| H <sub>9</sub>                   | NH (closer to py)     | 14.26 (s, 1H)              | 14.40 (s, 1H)              | 14.57 (s, 1H)              | 15.00 (s, 1H)                                                    |
| H <sub>11</sub>                  | NH (closer to ph)     | 10.17 (s, 1H)              | 9.99 (s, 1H)               | 9.95 (s, 1H)               | -                                                                |
| H <sub>13</sub>                  | CH <sub>ph</sub>      | n.a.                       | n.a.                       | n.a.                       | 7.15 (s, 1H)                                                     |
| H <sub>18</sub>                  | OH <sub>ph</sub>      | n.a.                       | n.a.                       | n.a.                       | 8.22 (s, 1H)                                                     |
| H <sub>19</sub> +H <sub>20</sub> | CH <sub>3ph</sub>     | 2.16 (s, 6H)               | 2.16 (s, 6H)               | 2.15 (s, 6H)               | 2.31 (s, 3H, H <sub>20</sub> )<br>2.22 (s, 3H, H <sub>19</sub> ) |



**Table S5.**  $^{13}\text{C}$  NMR (DMSO- $d_6$ )

|                                  |                                   | HL <sup>1</sup> (E-) | HL <sup>2</sup> (E-) | HL <sup>3</sup> (E-) | HL <sup>1a'</sup> | HL <sup>1a''</sup>        | HL <sup>2c'</sup> .CH <sub>3</sub> COOH (E-) | HL <sup>2c'</sup> (E-)   | HL <sup>2c''</sup> (CDCl <sub>3</sub> ) |
|----------------------------------|-----------------------------------|----------------------|----------------------|----------------------|-------------------|---------------------------|----------------------------------------------|--------------------------|-----------------------------------------|
| C <sub>2</sub>                   | C <sub>py</sub>                   | 153.31               | 154.59               | 132.97               | 149.28            | 148.19                    | 155.22                                       | 155.15                   | 154.97                                  |
| C <sub>3</sub>                   | CH <sub>py</sub> /C <sub>py</sub> | 120.54               | 121.18               | 143.99               | 119.25            | 120.04                    | 119.65                                       | 119.65                   | 122.31                                  |
| C <sub>4</sub>                   | CH <sub>py</sub>                  | 136.43               | 136.34               | 122.34               | 137.52            | 138.06                    | 136.43                                       | 136.44                   | 136.46                                  |
| C <sub>5</sub>                   | CH <sub>py</sub>                  | 124.10               | 124.00               | 124.52               | 124.61            | 126.14                    | 123.35                                       | 123.35                   | 125.34                                  |
| C <sub>6</sub>                   | CH <sub>py</sub>                  | 149.27               | 148.43               | 137.25               | 149.73            | 150.25                    | 148.57                                       | 148.57                   | 149.29                                  |
| C <sub>7</sub>                   | C=N                               | 142.51               | 148.54               | 149.23               | -                 | -                         | 149.29*                                      | n.a.                     | 169.42                                  |
| C <sub>7</sub>                   | thiadiazole                       | -                    | -                    | -                    | 158.40            | 169.98                    | -                                            | -                        | -                                       |
| C <sub>7'</sub>                  | CH <sub>3</sub> (C=N)             | -                    | 12.31                | -                    | -                 | -                         | 12.55                                        | 12.56                    | 14.88                                   |
| C <sub>10</sub>                  | C=S                               | 176.55               | 177.36               | 176.13               | -                 | -                         | -                                            | -                        | -                                       |
| C <sub>10</sub>                  | S-C-N                             | -                    | -                    | -                    | 166.77            | 171.58                    | 166.47                                       | n.a.                     | 173.74                                  |
| C <sub>12</sub>                  | C <sub>ph</sub>                   | 130.18               | 130.36               | 130.59               | 132.53            | 162.21                    | 153.88*                                      | n.a.                     | 169.74                                  |
| C <sub>13</sub> +C <sub>17</sub> | CH <sub>ph</sub>                  | 126.26               | 126.33               | 126.88               | 118.67            | 136.08 (C <sub>17</sub> ) | 126.88* (C <sub>17</sub> )                   | n.a.                     | 129.52 (C <sub>13</sub> )               |
|                                  |                                   |                      |                      |                      |                   | 125.96 (C <sub>13</sub> ) | 115.78 (C <sub>13</sub> )                    | n.a.                     | 129.25 (C <sub>17</sub> )               |
| C <sub>14</sub> +C <sub>16</sub> | C(CH <sub>3</sub> ) <sub>ph</sub> | 123.84               | 123.83               | 123.83               | 125.11            | 143.89 (C <sub>14</sub> ) | 124.07                                       | 124.07                   | 145.86                                  |
|                                  |                                   |                      |                      |                      |                   | 143.11 (C <sub>16</sub> ) | 117.44                                       | 117.80*                  | 145.41                                  |
| C <sub>15</sub>                  | C(OH) <sub>ph</sub>               | 151.10               | 151.12               | 151.17               | 148.97            | 187.14                    | 148.14                                       | 148.15                   | 184.43                                  |
| C <sub>19</sub> +C <sub>20</sub> | C(CH <sub>3</sub> ) <sub>ph</sub> | 16.62                | 16.63                | 16.63                | 16.87             | 16.10 (C <sub>19</sub> )  | 17.08 (C <sub>19</sub> )                     | 17.09 (C <sub>19</sub> ) | 17.38 (C <sub>19</sub> )                |
|                                  |                                   |                      |                      |                      |                   | 15.66 (C <sub>20</sub> )  | 15.47 (C <sub>20</sub> )                     | 15.54 (C <sub>20</sub> ) | 15.54 (C <sub>20</sub> )                |

|                                  |                                   | HL <sup>1</sup> (Z-) | HL <sup>2</sup> (Z-) | HL <sup>3</sup> (Z-) | HL <sup>2c'</sup> (Z-)                        |
|----------------------------------|-----------------------------------|----------------------|----------------------|----------------------|-----------------------------------------------|
| C <sub>2</sub>                   | C <sub>py</sub>                   |                      |                      |                      | 152.61                                        |
| C <sub>3</sub>                   | CH <sub>py</sub>                  |                      |                      |                      | 124.08*                                       |
| C <sub>4</sub>                   | CH <sub>py</sub>                  |                      |                      |                      | 138.29                                        |
| C <sub>5</sub>                   | CH <sub>py</sub>                  |                      |                      |                      | 124.26*                                       |
| C <sub>6</sub>                   | CH <sub>py</sub>                  |                      |                      |                      | 147.63                                        |
| C <sub>7'</sub>                  | CH <sub>3</sub> (C=N)             | -                    | 21.73                | -                    | 21.72                                         |
| C <sub>13</sub>                  | CH <sub>ph</sub>                  |                      |                      |                      | 118.98 (C <sub>13</sub> )                     |
| C <sub>14</sub> +C <sub>16</sub> | C(CH <sub>3</sub> ) <sub>ph</sub> |                      |                      |                      | 117.67* (C <sub>14</sub> or C <sub>16</sub> ) |
| C <sub>15</sub>                  | C(OH) <sub>ph</sub>               |                      |                      |                      | 148.39                                        |
| C <sub>19</sub> +C <sub>20</sub> | C(CH <sub>3</sub> ) <sub>ph</sub> |                      |                      |                      | 17.20 (C <sub>19</sub> )                      |
|                                  |                                   |                      |                      |                      | 15.87 (C <sub>20</sub> )                      |

\* detected from  $^1\text{H}$ ,  $^{13}\text{C}$  HMBC,  $^1\text{H}$ ,  $^{13}\text{C}$  HSQC**Table S6.**  $^{15}\text{N}$  NMR (DMSO- $d_6$ )

|                 |                   | HL <sup>1</sup> (E-) | HL <sup>2</sup> (E-) | HL <sup>3</sup> (E-) | HL <sup>2c'</sup> .CH <sub>3</sub> COOH (E-) |
|-----------------|-------------------|----------------------|----------------------|----------------------|----------------------------------------------|
| N <sub>1</sub>  | N <sub>py</sub>   | 315.07               | 310.61               | 321.53               | 309.86                                       |
| N <sub>3'</sub> | NH <sub>2</sub>   | -                    | -                    | 71.10                | -                                            |
| N <sub>8</sub>  | C=N               | 325.04               | 312.94               | 312.8                | 337.75                                       |
| N <sub>9</sub>  | NH (closer to py) | 174.22               | 168.53               | 174.57               | n.a.                                         |
| N <sub>11</sub> | NH (closer to ph) | 128.93               | 129.34               | 126.69               | -                                            |

**Assignment of *E*- and *Z*-isomers in **HL**<sup>1</sup>–**HL**<sup>3</sup>.** The assignment of *E*- and *Z*-isomers was based on <sup>1</sup>H, <sup>1</sup>H NOESY cross-peaks between NH(9) and protons of R<sub>1</sub> in *E*-isomer, whereas the ‘diagnostic’ signature of *Z*-isomer is the downfield shifted proton NH(9) due to the hydrogen bond to pyridine nitrogen atom. The NH signals of the *Z*-isomer of **HL**<sup>1</sup>–**HL**<sup>3</sup> are seen at 14.26, 14.40, 14.57 (H<sub>9</sub>) and 10.17, 9.99, 9.95 (H<sub>11</sub>) ppm, while those for the *E*-isomer at 11.86, 10.46, 11.47 (H<sub>9</sub>), and 10.00, 9.94, 9.70 (H<sub>11</sub>) ppm. The *E/Z* ratio is 23:1, 17:1 and 31:1 for **HL**<sup>1</sup>–**HL**<sup>3</sup>, respectively. The predominance of *E*-isomer in DMSO makes the assignment of other protons of minor *Z*-isomer difficult, since they are often overlapped with the proton resonances of the *E*-isomer. Two NH signals for *E*-isomers were assigned based on <sup>1</sup>H, <sup>1</sup>H NOESY spectra, where the correlations between the H<sub>11</sub> signal and the CH protons (H<sub>13</sub> and H<sub>17</sub>) of phenolic moiety, as well as between the H<sub>9</sub> signal and the aldimine CH proton (H<sub>7</sub>) in **HL**<sup>1</sup>, **HL**<sup>3</sup> or the methyl protons at the ketimine group (H<sub>7'</sub>) in **HL**<sup>2</sup> were found.

Even more remarkable differences due to the presence of two different isomeric forms in DMSO were observed in the <sup>13</sup>C NMR spectrum of **HL**<sup>2</sup>. The carbon atom of the methyl group (C<sub>7'</sub>) in *E*-isomer resonates at 12.31 ppm, whereas in *Z*-isomer at 21.73 ppm, as also reported for 2-acetylpyridine *N,N*-dimethyl(chalcogen)semicarbazones.<sup>23</sup> Of note is also that the signals of methyl protons in both isomers in the <sup>1</sup>H NMR spectrum show almost the same chemical shifts at 2.44 (*E*) and 2.43 (*Z*) ppm. The protons of the amine group (H<sub>3'</sub>) in **HL**<sup>3</sup> due to the hydrogen bond formation to nitrogen N8 in *E*-isomer resonate at 6.49 ppm, whereas in the case of *Z*-isomer the signal of H<sub>3'</sub> protons is slightly upfield shifted to 6.21 ppm.

**Assignment of resonances in **HL**<sup>1a'</sup> and **HL**<sup>1a''</sup>.** The protons H<sub>13</sub>/H<sub>17</sub>, H<sub>19</sub>/H<sub>20</sub>, and carbon atoms C<sub>13</sub>/C<sub>17</sub>, C<sub>14</sub>/C<sub>16</sub> and C<sub>19</sub>/C<sub>20</sub> in **HL**<sup>1a''</sup> are magnetically non-equivalent in contrast to these atoms in **HL**<sup>1</sup>–**HL**<sup>3</sup> and **HL**<sup>1a'</sup>. This can be explained by the involvement of atom H<sub>13</sub> and nitrogen atom N<sub>9</sub> in hydrogen bond formation, the latter being more electronegative than the S atom of 1,3,4-thiadiazole ring (see Scheme S5). It is also worth mentioning the different multiplicity of protons H<sub>13</sub>/H<sub>17</sub>, H<sub>19</sub>/H<sub>20</sub> of 1,4-benzoquinone imine moiety in **HL**<sup>1a''</sup>. The protons of CH (H<sub>13</sub>+H<sub>17</sub>) or CH<sub>3</sub> (H<sub>19</sub>+H<sub>20</sub>) groups in **HL**<sup>1</sup>–**HL**<sup>3</sup> and **HL**<sup>1a'</sup> appear as singlets with intensity ratio 2:6, correspondingly, whereas in **HL**<sup>1a''</sup> as two doublets of quartet for H<sub>13</sub> and H<sub>17</sub> (dq, <sup>4</sup>J = 2.8 (or 2.7), 1.3 (or 1.5) Hz, coupled with CH and CH<sub>3</sub> protons, respectively) and as two doublets for methyl protons H<sub>20</sub> and H<sub>19</sub> (d, <sup>4</sup>J = 1.5 Hz, coupled with the CH proton) with the intensity ratio 1(dq):1(dq):3(d):3(d). The resonance signal of hydrogen bond proton H<sub>13</sub> is downfield shifted to 7.46 ppm vs 7.20 ppm for atom H<sub>17</sub>. The assignment of methyl groups in **HL**<sup>1a''</sup> was done

accounting for the correlation between the *CH* and the *CH*<sub>3</sub> protons (H<sub>13</sub> – H<sub>19</sub>, H<sub>17</sub> – H<sub>20</sub>) in the <sup>1</sup>H, <sup>1</sup>H NOESY spectrum.

### 19. Complexation of **HL**<sup>1a'</sup> and **HL**<sup>1a''</sup>

**Table S7.** Summarized ESI-MS experiment of the complexation of 1,3,4-thiadiazoles **HL**<sup>1a'</sup> and **HL**<sup>1a''</sup>

| <b>HL</b>                 | <b>Reaction conditions</b>                  | <b>Positive ESI-MS peaks detected</b>                                      |                                                                   |                                                                           |                                                            |
|---------------------------|---------------------------------------------|----------------------------------------------------------------------------|-------------------------------------------------------------------|---------------------------------------------------------------------------|------------------------------------------------------------|
| <b>HL</b> <sup>1a'</sup>  | MeOH, r.t. under argon                      | 659.16                                                                     | 402.10                                                            |                                                                           |                                                            |
|                           | MeOH, r.t. under air                        | [Cu( <b>HL</b> <sup>1a'</sup> ) <sub>2</sub> ] <sup>+</sup>                | [Cu( <b>HL</b> <sup>1a'</sup> )+CH <sub>3</sub> CN] <sup>+</sup>  |                                                                           |                                                            |
|                           | MeOH, 50°C under air, 3 h                   | 657.13                                                                     | 400.10                                                            |                                                                           |                                                            |
|                           | DMF, r.t., under air, 10 min                | [Cu( <b>HL</b> <sup>1a'</sup> )( <b>HL</b> <sup>1a''</sup> )] <sup>+</sup> | [Cu( <b>HL</b> <sup>1a''</sup> )+CH <sub>3</sub> CN] <sup>+</sup> |                                                                           |                                                            |
|                           | DMF, ice bath, under air, 1 h               | 655.18                                                                     |                                                                   |                                                                           |                                                            |
|                           |                                             | [Cu( <b>HL</b> <sup>1a''</sup> ) <sub>2</sub> ] <sup>+</sup>               |                                                                   |                                                                           |                                                            |
|                           | chromatography<br>(SiO <sub>2</sub> , MeOH) | 655.18                                                                     | 400.10                                                            | 537.15                                                                    |                                                            |
|                           |                                             | [Cu( <b>HL</b> <sup>1a''</sup> ) <sub>2</sub> ] <sup>+</sup>               | [Cu( <b>HL</b> <sup>1a''</sup> )+CH <sub>3</sub> CN] <sup>+</sup> | [Cu( <b>HL</b> <sup>1a''</sup> )( <b>HL</b> <sup>1d</sup> )] <sup>+</sup> |                                                            |
| <b>HL</b> <sup>1a''</sup> | MeOH, 50°C under air, 1 h                   |                                                                            |                                                                   | 537.15                                                                    | 419.08                                                     |
|                           |                                             |                                                                            |                                                                   | [Cu( <b>HL</b> <sup>1a''</sup> )( <b>HL</b> <sup>1d</sup> )] <sup>+</sup> | [Cu( <b>HL</b> <sup>1d</sup> ) <sub>2</sub> ] <sup>+</sup> |
|                           | MeOH, 50°C under air, 36 h                  |                                                                            |                                                                   |                                                                           | 419.08                                                     |
|                           |                                             |                                                                            |                                                                   |                                                                           | [Cu( <b>HL</b> <sup>1d</sup> ) <sub>2</sub> ] <sup>+</sup> |

## 20. Cell apoptosis assay

**Table S8.** Gated events (%) in Colo320 cells measured by flow cytometry with 3 h induction time

| Colo320 colon adenocarcinoma cells                                   |               | Gated events %          |                                     |                    |
|----------------------------------------------------------------------|---------------|-------------------------|-------------------------------------|--------------------|
| A+: annexin positive<br>I+: propidium iodide positive                | Concentration | Early apoptosis %<br>Q3 | Late apoptosis and necrosis %<br>Q2 | Cell death %<br>Q1 |
| Control A-I+                                                         | -             | 0                       | 0                                   | 0.074              |
| Control A+I-                                                         | -             | 0.032                   | 0.010                               | 5.24               |
| Control A+I+                                                         | -             | 3.70                    | 5.34                                | 3.44               |
| Control A+I+                                                         | -             | 3.25                    | 9.99                                | 6.93               |
| DMSO                                                                 | 0.8%          | 3.26                    | 3.05                                | 1.35               |
| M627<br>(12 <i>H</i> -benzophenothiazine)<br><i>positive control</i> | 10 $\mu$ M    | 12.4                    | 31.5                                | 4.59               |
| M627<br>(12 <i>H</i> -benzophenothiazine)<br><i>positive control</i> | 20 $\mu$ M    | 11.1                    | 26.1                                | 7.85               |
| cisplatin (Teva)<br><i>positive control</i>                          | 15 $\mu$ M    | 1.68                    | 2.24                                | 1.64               |
| cisplatin (Teva)<br><i>positive control</i>                          | 30 $\mu$ M    | 4.90                    | 4.07                                | 0.79               |
| <b>HL<sup>1</sup></b>                                                | 4 $\mu$ M     | 6.19                    | 12.4                                | 2.79               |
| <b>HL<sup>1</sup></b>                                                | 8 $\mu$ M     | 7.65                    | 7.0                                 | 1.57               |
| <b>Cu(L<sup>2</sup>)Cl</b>                                           | 0.25 $\mu$ M  | 6.28                    | 5.12                                | 1.13               |
| <b>Cu(L<sup>2</sup>)Cl</b>                                           | 0.5 $\mu$ M   | 6.33                    | 17.2                                | 3.76               |
| Control A+I+                                                         | -             | 4.73                    | 7.18                                | 2.89               |

**Table S9.** Percentage of cell cycle distributions of SW480 cells induced by the TSC **HL<sup>1</sup>** and complexes **1** and **2'** at the concentration of 10  $\mu$ M for 24 h compared to the negative control

| Cell cycle phase | Negativ control | <b>HL<sup>1</sup></b> | <b>1</b>       | <b>2'</b>      |
|------------------|-----------------|-----------------------|----------------|----------------|
| G0/G1            | 49.1 $\pm$ 2.1  | 49.2 $\pm$ 1.6        | 38.9 $\pm$ 1.7 | 31.8 $\pm$ 0.6 |
| S                | 29.8 $\pm$ 3.0  | 37.1 $\pm$ 4.7        | 44.0 $\pm$ 4.5 | 46.5 $\pm$ 1.8 |
| G2/M             | 21.4 $\pm$ 4.6  | 12.3 $\pm$ 4.4        | 21.0 $\pm$ 6.2 | 22.2 $\pm$ 1.9 |

## 21. Computational data

### Geometry optimization of *s-trans*- and *s-cis*-conformers around the N2-C3 thioamide bond for *E*- and *Z*-isomers of HL<sup>1</sup>-HL<sup>3</sup>

**Data 1:** Cartesian coordinates and energies of the optimized geometry for the *s-trans*-conformer of (*E*)-HL<sup>1</sup> (DMSO solution).

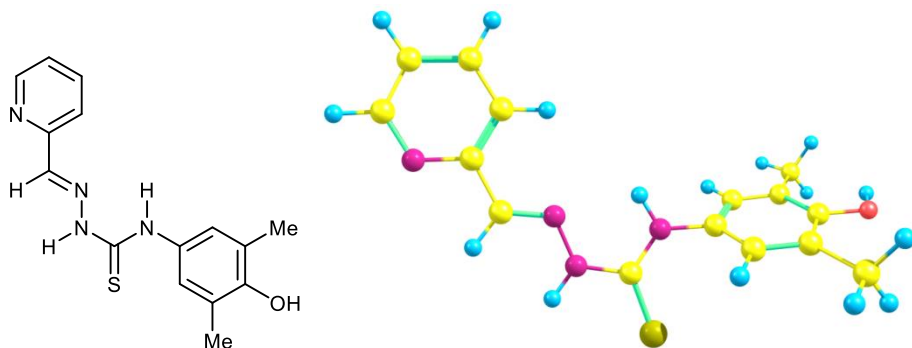

|                                               |                             |
|-----------------------------------------------|-----------------------------|
| Electronic Energy =                           | -1273.92279515 a.u.         |
| Zero-point correction =                       | 0.290366 (Hartree/Particle) |
| Thermal correction to Energy =                | 0.310592                    |
| Thermal correction to Enthalpy =              | 0.311537                    |
| Thermal correction to Gibbs Free Energy =     | 0.238748                    |
| Sum of electronic and zero-point Energies =   | -1273.632429                |
| Sum of electronic and thermal Energies =      | -1273.612203                |
| Sum of electronic and thermal Enthalpies =    | -1273.611259                |
| Sum of electronic and thermal Free Energies = | -1273.684047                |

Standard orientation:

| Center Number | Atomic Number | Atomic Type | Coordinates (Angstroms) |           |           |
|---------------|---------------|-------------|-------------------------|-----------|-----------|
|               |               |             | X                       | Y         | Z         |
| 1             | 6             | 0           | 6.354331                | -1.876923 | 0.484469  |
| 2             | 6             | 0           | 5.022374                | -2.281758 | 0.567958  |
| 3             | 6             | 0           | 4.020322                | -1.345744 | 0.353563  |
| 4             | 6             | 0           | 4.385427                | -0.024199 | 0.059896  |
| 5             | 7             | 0           | 5.669748                | 0.371471  | -0.021612 |
| 6             | 6             | 0           | 6.622125                | -0.542318 | 0.187761  |
| 7             | 7             | 0           | 2.139385                | 0.809972  | -0.142103 |
| 8             | 7             | 0           | 1.305047                | 1.850332  | -0.384060 |
| 9             | 6             | 0           | -0.057903               | 1.695421  | -0.379636 |
| 10            | 16            | 0           | -1.026132               | 3.039151  | -0.733290 |
| 11            | 7             | 0           | -0.485091               | 0.453246  | -0.096686 |
| 12            | 6             | 0           | -1.840524               | 0.004615  | -0.014167 |
| 13            | 6             | 0           | -2.274403               | -0.993306 | -0.882296 |
| 14            | 6             | 0           | -3.572125               | -1.504034 | -0.798827 |
| 15            | 6             | 0           | -4.428186               | -0.974129 | 0.177792  |
| 16            | 6             | 0           | -4.010072               | 0.028557  | 1.067887  |
| 17            | 6             | 0           | -2.703752               | 0.501626  | 0.961281  |
| 18            | 6             | 0           | -4.957861               | 0.560914  | 2.111552  |
| 19            | 6             | 0           | -4.044863               | -2.589625 | -1.734778 |
| 20            | 8             | 0           | -5.720569               | -1.413485 | 0.320114  |
| 21            | 6             | 0           | 3.401237                | 1.035836  | -0.184541 |
| 22            | 1             | 0           | 1.663572                | 2.771749  | -0.617638 |
| 23            | 1             | 0           | 0.247970                | -0.240446 | 0.013234  |
| 24            | 1             | 0           | -5.921282               | -2.089256 | -0.337672 |

|    |   |   |           |           |           |
|----|---|---|-----------|-----------|-----------|
| 25 | 1 | 0 | 7.166983  | -2.574533 | 0.644307  |
| 26 | 1 | 0 | 4.771091  | -3.310909 | 0.796334  |
| 27 | 1 | 0 | 2.974526  | -1.618220 | 0.408562  |
| 28 | 1 | 0 | 7.647030  | -0.191227 | 0.114744  |
| 29 | 1 | 0 | -1.596654 | -1.378703 | -1.635988 |
| 30 | 1 | 0 | -2.355303 | 1.265447  | 1.645510  |
| 31 | 1 | 0 | -4.469784 | 1.318908  | 2.725736  |
| 32 | 1 | 0 | -5.842853 | 1.009888  | 1.650723  |
| 33 | 1 | 0 | -5.314964 | -0.237684 | 2.768402  |
| 34 | 1 | 0 | -4.905379 | -2.268196 | -2.332659 |
| 35 | 1 | 0 | -4.338423 | -3.496052 | -1.192911 |
| 36 | 1 | 0 | -3.253560 | -2.869010 | -2.430803 |
| 37 | 1 | 0 | 3.809319  | 2.024966  | -0.404396 |

**Data 2:** Cartesian coordinates and energies of the optimized geometry for the *s-cis*-conformer of (*E*)-HL<sup>1</sup> (DMSO solution).

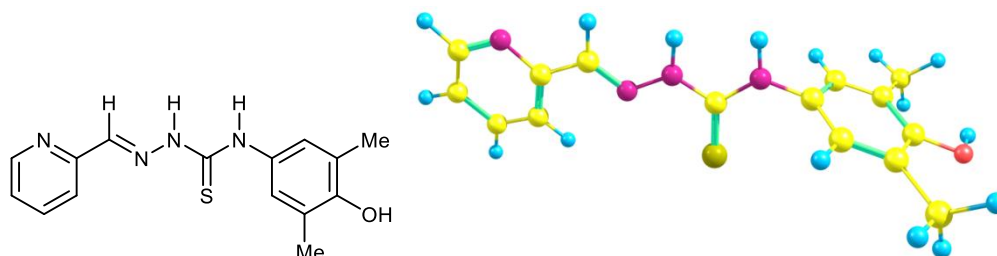

|                                               |                             |
|-----------------------------------------------|-----------------------------|
| Electronic Energy =                           | -1273.91322461 a.u.         |
| Zero-point correction =                       | 0.289784 (Hartree/Particle) |
| Thermal correction to Energy =                | 0.310316                    |
| Thermal correction to Enthalpy =              | 0.311261                    |
| Thermal correction to Gibbs Free Energy =     | 0.236149                    |
| Sum of electronic and zero-point Energies =   | -1273.623441                |
| Sum of electronic and thermal Energies =      | -1273.602908                |
| Sum of electronic and thermal Enthalpies =    | -1273.601964                |
| Sum of electronic and thermal Free Energies = | -1273.677075                |

Standard orientation:

| Center Number | Atomic Number | Atomic Type | Coordinates (Angstroms) |           |           |
|---------------|---------------|-------------|-------------------------|-----------|-----------|
|               |               |             | X                       | Y         | Z         |
| 1             | 6             | 0           | -7.403343               | 0.211676  | 0.505771  |
| 2             | 6             | 0           | -6.366146               | 0.604539  | 1.351675  |
| 3             | 6             | 0           | -5.054316               | 0.417087  | 0.939585  |
| 4             | 6             | 0           | -4.819235               | -0.161892 | -0.315835 |
| 5             | 7             | 0           | -5.816661               | -0.543016 | -1.135531 |
| 6             | 6             | 0           | -7.074369               | -0.355341 | -0.723146 |
| 7             | 7             | 0           | -2.423788               | -0.082110 | -0.166164 |
| 8             | 7             | 0           | -1.226563               | -0.343876 | -0.737898 |
| 9             | 6             | 0           | -0.029096               | -0.062044 | -0.124829 |
| 10            | 16            | 0           | 0.096594                | 0.692569  | 1.377698  |
| 11            | 7             | 0           | 1.035870                | -0.460041 | -0.862417 |
| 12            | 6             | 0           | 2.415456                | -0.269656 | -0.516982 |
| 13            | 6             | 0           | 3.152631                | -1.337414 | -0.015552 |
| 14            | 6             | 0           | 4.510979                | -1.195072 | 0.278200  |
| 15            | 6             | 0           | 5.105736                | 0.056576  | 0.057211  |
| 16            | 6             | 0           | 4.381876                | 1.146917  | -0.452805 |
| 17            | 6             | 0           | 3.031385                | 0.960094  | -0.741094 |
| 18            | 6             | 0           | 5.063191                | 2.471549  | -0.680698 |
| 19            | 6             | 0           | 5.319125                | -2.349132 | 0.819770  |
| 20            | 8             | 0           | 6.432264                | 0.280551  | 0.324345  |
| 21            | 6             | 0           | -3.467881               | -0.399985 | -0.838100 |

|    |   |   |           |           |           |
|----|---|---|-----------|-----------|-----------|
| 22 | 1 | 0 | -1.218199 | -0.777935 | -1.659166 |
| 23 | 1 | 0 | 0.861386  | -0.975774 | -1.717040 |
| 24 | 1 | 0 | 6.845794  | -0.518165 | 0.671661  |
| 25 | 1 | 0 | -8.440959 | 0.339622  | 0.788033  |
| 26 | 1 | 0 | -6.578985 | 1.049495  | 2.316690  |
| 27 | 1 | 0 | -4.219398 | 0.706657  | 1.564075  |
| 28 | 1 | 0 | -7.855202 | -0.673270 | -1.407522 |
| 29 | 1 | 0 | 2.665447  | -2.291447 | 0.151956  |
| 30 | 1 | 0 | 2.449649  | 1.782520  | -1.141175 |
| 31 | 1 | 0 | 4.363003  | 3.200611  | -1.090858 |
| 32 | 1 | 0 | 5.470058  | 2.873227  | 0.252162  |
| 33 | 1 | 0 | 5.903220  | 2.372198  | -1.374407 |
| 34 | 1 | 0 | 6.148272  | -2.615144 | 0.154072  |
| 35 | 1 | 0 | 4.695520  | -3.236345 | 0.931959  |
| 36 | 1 | 0 | 5.744724  | -2.123661 | 1.804259  |
| 37 | 1 | 0 | -3.415910 | -0.862209 | -1.827589 |

**Data 3:** Cartesian coordinates and energies of the optimized geometry for the *s-trans*-conformer of (Z)-HL<sup>1</sup> (DMSO solution).

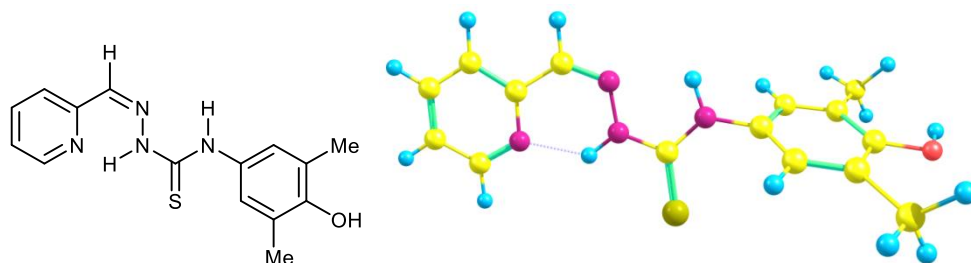

|                                               |                             |
|-----------------------------------------------|-----------------------------|
| Electronic Energy =                           | -1273.92510682 a.u.         |
| Zero-point correction =                       | 0.290951 (Hartree/Particle) |
| Thermal correction to Energy =                | 0.310883                    |
| Thermal correction to Enthalpy =              | 0.311827                    |
| Thermal correction to Gibbs Free Energy =     | 0.239855                    |
| Sum of electronic and zero-point Energies =   | -1273.634156                |
| Sum of electronic and thermal Energies =      | -1273.614224                |
| Sum of electronic and thermal Enthalpies =    | -1273.613280                |
| Sum of electronic and thermal Free Energies = | -1273.685251                |

Standard orientation:

| Center Number | Atomic Number | Atomic Type | Coordinates (Angstroms) |           |           |
|---------------|---------------|-------------|-------------------------|-----------|-----------|
|               |               |             | X                       | Y         | Z         |
| 1             | 6             | 0           | 6.660772                | 0.595628  | -0.414896 |
| 2             | 6             | 0           | 6.762452                | -0.562047 | 0.353143  |
| 3             | 6             | 0           | 5.598466                | -1.190785 | 0.776857  |
| 4             | 6             | 0           | 4.358412                | -0.641034 | 0.418763  |
| 5             | 7             | 0           | 4.263846                | 0.482332  | -0.325951 |
| 6             | 6             | 0           | 5.390323                | 1.076347  | -0.726770 |
| 7             | 7             | 0           | 1.895795                | -0.993456 | 0.668379  |
| 8             | 7             | 0           | 1.591263                | 0.111097  | -0.054136 |
| 9             | 6             | 0           | 0.283260                | 0.449436  | -0.286942 |
| 10            | 16            | 0           | -0.049410               | 1.826932  | -1.217498 |
| 11            | 7             | 0           | -0.625387               | -0.379623 | 0.253884  |
| 12            | 6             | 0           | -2.049138               | -0.266572 | 0.179211  |
| 13            | 6             | 0           | -2.773426               | -1.248662 | -0.490358 |
| 14            | 6             | 0           | -4.169411               | -1.208044 | -0.534297 |
| 15            | 6             | 0           | -4.819071               | -0.145370 | 0.110853  |
| 16            | 6             | 0           | -4.109234               | 0.855425  | 0.794323  |

|    |   |   |           |           |           |
|----|---|---|-----------|-----------|-----------|
| 17 | 6 | 0 | -2.718495 | 0.772960  | 0.823501  |
| 18 | 6 | 0 | -4.847024 | 1.975877  | 1.480857  |
| 19 | 6 | 0 | -4.958609 | -2.269706 | -1.261023 |
| 20 | 8 | 0 | -6.186678 | -0.028940 | 0.111421  |
| 21 | 6 | 0 | 3.131638  | -1.309698 | 0.867175  |
| 22 | 1 | 0 | 2.352039  | 0.677647  | -0.440824 |
| 23 | 1 | 0 | -0.235349 | -1.191362 | 0.724017  |
| 24 | 1 | 0 | -6.587865 | -0.762777 | -0.368273 |
| 25 | 1 | 0 | 7.541137  | 1.118272  | -0.766791 |
| 26 | 1 | 0 | 7.731913  | -0.967629 | 0.616871  |
| 27 | 1 | 0 | 5.638217  | -2.092786 | 1.375082  |
| 28 | 1 | 0 | 5.271631  | 1.975407  | -1.322833 |
| 29 | 1 | 0 | -2.246628 | -2.055771 | -0.987357 |
| 30 | 1 | 0 | -2.149701 | 1.526348  | 1.354954  |
| 31 | 1 | 0 | -4.148085 | 2.655793  | 1.969982  |
| 32 | 1 | 0 | -5.444695 | 2.551905  | 0.768033  |
| 33 | 1 | 0 | -5.539757 | 1.591973  | 2.235550  |
| 34 | 1 | 0 | -5.651163 | -2.793675 | -0.592450 |
| 35 | 1 | 0 | -4.292457 | -3.019000 | -1.689368 |
| 36 | 1 | 0 | -5.547850 | -1.848685 | -2.083688 |
| 37 | 1 | 0 | 3.268490  | -2.210010 | 1.458089  |

**Data 4:** Cartesian coordinates and energies of the optimized geometry for the *s-cis*-conformer of (Z)-HL<sup>1</sup> (DMSO solution).

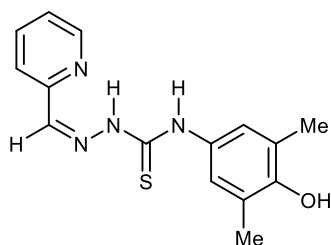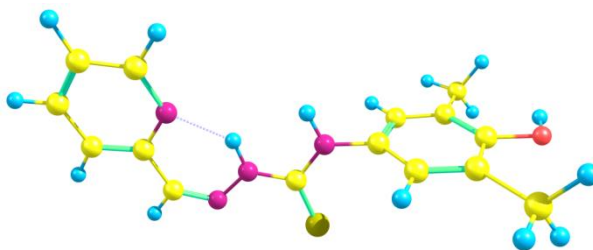

|                                               |                             |
|-----------------------------------------------|-----------------------------|
| Electronic Energy =                           | -1273.91615582 a.u.         |
| Zero-point correction =                       | 0.290434 (Hartree/Particle) |
| Thermal correction to Energy =                | 0.309645                    |
| Thermal correction to Enthalpy =              | 0.310589                    |
| Thermal correction to Gibbs Free Energy =     | 0.240966                    |
| Sum of electronic and zero-point Energies =   | -1273.625722                |
| Sum of electronic and thermal Energies =      | -1273.606511                |
| Sum of electronic and thermal Enthalpies =    | -1273.605567                |
| Sum of electronic and thermal Free Energies = | -1273.675190                |

Standard orientation:

| Center Number | Atomic Number | Atomic Type | Coordinates (Angstroms) |           |           |
|---------------|---------------|-------------|-------------------------|-----------|-----------|
|               |               |             | X                       | Y         | Z         |
| 1             | 6             | 0           | -5.736314               | 2.161206  | 0.447164  |
| 2             | 6             | 0           | -6.504162               | 1.021234  | 0.217872  |
| 3             | 6             | 0           | -5.860405               | -0.184280 | -0.029962 |
| 4             | 6             | 0           | -4.457984               | -0.218277 | -0.042171 |
| 5             | 7             | 0           | -3.717798               | 0.890248  | 0.180967  |
| 6             | 6             | 0           | -4.348654               | 2.043480  | 0.418124  |
| 7             | 7             | 0           | -2.518563               | -1.771466 | -0.365938 |
| 8             | 7             | 0           | -1.623851               | -0.778751 | -0.166512 |
| 9             | 6             | 0           | -0.270013               | -1.001679 | -0.215046 |
| 10            | 16            | 0           | 0.437287                | -2.510801 | -0.484485 |
| 11            | 7             | 0           | 0.439575                | 0.137540  | -0.023579 |
| 12            | 6             | 0           | 1.869189                | 0.245245  | 0.020726  |



|    |   |   |           |           |           |
|----|---|---|-----------|-----------|-----------|
| 13 | 6 | 0 | 2.560063  | 0.712396  | -1.092687 |
| 14 | 6 | 0 | 3.946795  | 0.877700  | -1.058823 |
| 15 | 6 | 0 | 4.620597  | 0.555938  | 0.129326  |
| 16 | 6 | 0 | 3.943393  | 0.087795  | 1.267214  |
| 17 | 6 | 0 | 2.559119  | -0.056017 | 1.193500  |
| 18 | 6 | 0 | 4.706310  | -0.240088 | 2.524641  |
| 19 | 6 | 0 | 4.703646  | 1.385312  | -2.261919 |
| 20 | 8 | 0 | 5.981265  | 0.687761  | 0.243828  |
| 21 | 6 | 0 | -3.778112 | -1.493414 | -0.304819 |
| 22 | 1 | 0 | -2.012291 | 0.156827  | 0.024074  |
| 23 | 1 | 0 | -0.076410 | 1.004250  | 0.072251  |
| 24 | 1 | 0 | 6.360703  | 1.001191  | -0.585337 |
| 25 | 1 | 0 | -6.196481 | 3.121078  | 0.644281  |
| 26 | 1 | 0 | -7.586358 | 1.071923  | 0.232238  |
| 27 | 1 | 0 | -6.424776 | -1.090593 | -0.212228 |
| 28 | 1 | 0 | -3.716774 | 2.908359  | 0.592031  |
| 29 | 1 | 0 | 2.014421  | 0.947834  | -1.999556 |
| 30 | 1 | 0 | 2.010357  | -0.410859 | 2.058333  |
| 31 | 1 | 0 | 4.029165  | -0.580855 | 3.309130  |
| 32 | 1 | 0 | 5.447184  | -1.024898 | 2.345176  |
| 33 | 1 | 0 | 5.253520  | 0.631338  | 2.896182  |
| 34 | 1 | 0 | 5.218768  | 2.329520  | -2.051632 |
| 35 | 1 | 0 | 4.025140  | 1.563969  | -3.096381 |
| 36 | 1 | 0 | 5.457182  | 0.666488  | -2.603460 |
| 37 | 1 | 0 | -4.426398 | -2.347143 | -0.477374 |

**Data 5:** Cartesian coordinates and energies of the optimized geometry for the *s-trans*-conformer of (*E*)-**HL**<sup>2</sup> (DMSO solution).

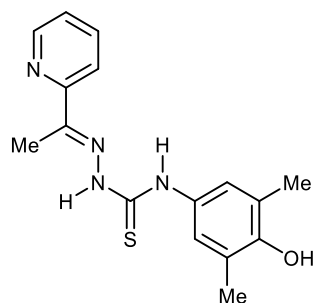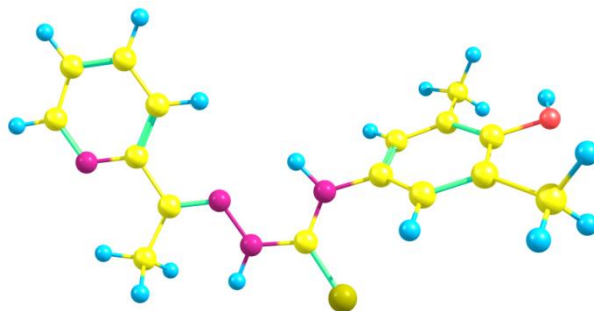

|                                               |                             |
|-----------------------------------------------|-----------------------------|
| Electronic Energy =                           | -1313.25113329 a.u.         |
| Zero-point correction =                       | 0.317993 (Hartree/Particle) |
| Thermal correction to Energy =                | 0.339858                    |
| Thermal correction to Enthalpy =              | 0.340802                    |
| Thermal correction to Gibbs Free Energy =     | 0.263747                    |
| Sum of electronic and zero-point Energies =   | -1312.933140                |
| Sum of electronic and thermal Energies =      | -1312.911275                |
| Sum of electronic and thermal Enthalpies =    | -1312.910331                |
| Sum of electronic and thermal Free Energies = | -1312.987386                |

Standard orientation:

| Center Number | Atomic Number | Atomic Type | Coordinates (Angstroms) |           |           |
|---------------|---------------|-------------|-------------------------|-----------|-----------|
|               |               |             | X                       | Y         | Z         |
| 1             | 6             | 0           | 5.773179                | -2.460848 | 0.491110  |
| 2             | 6             | 0           | 4.391878                | -2.641751 | 0.560430  |
| 3             | 6             | 0           | 3.558347                | -1.550015 | 0.367322  |
| 4             | 6             | 0           | 4.129701                | -0.293556 | 0.107115  |
| 5             | 7             | 0           | 5.460191                | -0.120262 | 0.042662  |
| 6             | 6             | 0           | 6.252444                | -1.181127 | 0.230335  |
| 7             | 7             | 0           | 2.009304                | 0.736192  | -0.093054 |

|    |    |   |           |           |           |
|----|----|---|-----------|-----------|-----------|
| 8  | 7  | 0 | 1.200705  | 1.809045  | -0.290196 |
| 9  | 6  | 0 | -0.165367 | 1.677993  | -0.300354 |
| 10 | 16 | 0 | -1.110003 | 3.053271  | -0.597170 |
| 11 | 7  | 0 | -0.614336 | 0.431387  | -0.078133 |
| 12 | 6  | 0 | -1.973497 | -0.005751 | -0.018106 |
| 13 | 6  | 0 | -2.402367 | -0.991196 | -0.903259 |
| 14 | 6  | 0 | -3.704011 | -1.494997 | -0.842878 |
| 15 | 6  | 0 | -4.569996 | -0.970978 | 0.128025  |
| 16 | 6  | 0 | -4.157444 | 0.018681  | 1.035032  |
| 17 | 6  | 0 | -2.846981 | 0.485084  | 0.951578  |
| 18 | 6  | 0 | -5.115529 | 0.544299  | 2.072770  |
| 19 | 6  | 0 | -4.170340 | -2.567066 | -1.797452 |
| 20 | 8  | 0 | -5.867002 | -1.404012 | 0.248118  |
| 21 | 6  | 0 | 3.287957  | 0.915536  | -0.112905 |
| 22 | 1  | 0 | 1.565190  | 2.735294  | -0.481601 |
| 23 | 1  | 0 | 0.111663  | -0.274324 | -0.002152 |
| 24 | 1  | 0 | -6.062744 | -2.071400 | -0.419638 |
| 25 | 1  | 0 | 6.460288  | -3.285264 | 0.635556  |
| 26 | 1  | 0 | 3.972045  | -3.620260 | 0.762848  |
| 27 | 1  | 0 | 2.483792  | -1.655390 | 0.415984  |
| 28 | 1  | 0 | 7.320814  | -0.996088 | 0.169030  |
| 29 | 1  | 0 | -1.717115 | -1.372520 | -1.652282 |
| 30 | 1  | 0 | -2.503542 | 1.238259  | 1.649752  |
| 31 | 1  | 0 | -4.630660 | 1.291118  | 2.702993  |
| 32 | 1  | 0 | -5.991335 | 1.005122  | 1.606092  |
| 33 | 1  | 0 | -5.486680 | -0.260073 | 2.714627  |
| 34 | 1  | 0 | -5.019240 | -2.232930 | -2.404900 |
| 35 | 1  | 0 | -4.478792 | -3.476902 | -1.269757 |
| 36 | 1  | 0 | -3.370556 | -2.845116 | -2.484274 |
| 37 | 6  | 0 | 3.937446  | 2.252107  | -0.341811 |
| 38 | 1  | 0 | 3.660372  | 2.657495  | -1.321025 |
| 39 | 1  | 0 | 3.620693  | 2.972374  | 0.420192  |
| 40 | 1  | 0 | 5.018304  | 2.157341  | -0.302328 |

**Data 6:** Cartesian coordinates and energies of the optimized geometry for the *s-cis*-conformer of (*E*)-**HL**<sup>2</sup> (DMSO solution).

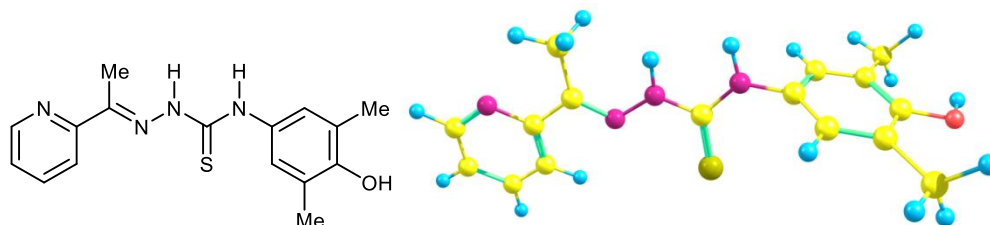

|                                               |                             |
|-----------------------------------------------|-----------------------------|
| Electronic Energy =                           | -1313.24090817 a.u.         |
| Zero-point correction =                       | 0.317413 (Hartree/Particle) |
| Thermal correction to Energy =                | 0.339522                    |
| Thermal correction to Enthalpy =              | 0.340466                    |
| Thermal correction to Gibbs Free Energy =     | 0.262335                    |
| Sum of electronic and zero-point Energies =   | -1312.923495                |
| Sum of electronic and thermal Energies =      | -1312.901386                |
| Sum of electronic and thermal Enthalpies =    | -1312.900442                |
| Sum of electronic and thermal Free Energies = | -1312.978573                |

Standard orientation:

| Center Number | Atomic Number | Atomic Type | Coordinates (Angstroms) |           |           |
|---------------|---------------|-------------|-------------------------|-----------|-----------|
|               |               |             | X                       | Y         | Z         |
| 1             | 6             | 0           | -7.083824               | -0.889030 | -0.618321 |
| 2             | 6             | 0           | -5.925049               | -1.503056 | -1.094885 |
| 3             | 6             | 0           | -4.690433               | -0.976928 | -0.745542 |

|    |    |   |           |           |           |
|----|----|---|-----------|-----------|-----------|
| 4  | 6  | 0 | -4.642717 | 0.159747  | 0.079019  |
| 5  | 7  | 0 | -5.758522 | 0.751021  | 0.536071  |
| 6  | 6  | 0 | -6.942941 | 0.232723  | 0.191662  |
| 7  | 7  | 0 | -2.283891 | 0.156881  | 0.074584  |
| 8  | 7  | 0 | -1.080333 | 0.671516  | 0.419861  |
| 9  | 6  | 0 | 0.107000  | 0.089141  | 0.042965  |
| 10 | 16 | 0 | 0.210044  | -1.364093 | -0.806180 |
| 11 | 7  | 0 | 1.183941  | 0.817227  | 0.430766  |
| 12 | 6  | 0 | 2.559899  | 0.459044  | 0.248795  |
| 13 | 6  | 0 | 3.330991  | 1.154239  | -0.677241 |
| 14 | 6  | 0 | 4.689758  | 0.870334  | -0.837653 |
| 15 | 6  | 0 | 5.249789  | -0.141465 | -0.043456 |
| 16 | 6  | 0 | 4.491057  | -0.853991 | 0.900078  |
| 17 | 6  | 0 | 3.142711  | -0.531474 | 1.037470  |
| 18 | 6  | 0 | 5.135525  | -1.928428 | 1.737327  |
| 19 | 6  | 0 | 5.531974  | 1.625048  | -1.837466 |
| 20 | 8  | 0 | 6.573928  | -0.486528 | -0.141857 |
| 21 | 6  | 0 | -3.343661 | 0.765752  | 0.488528  |
| 22 | 1  | 0 | -1.045356 | 1.524053  | 0.970881  |
| 23 | 1  | 0 | 1.019013  | 1.730437  | 0.837265  |
| 24 | 1  | 0 | 7.013183  | 0.047905  | -0.813364 |
| 25 | 1  | 0 | -8.068037 | -1.266414 | -0.866724 |
| 26 | 1  | 0 | -5.985567 | -2.379038 | -1.730412 |
| 27 | 1  | 0 | -3.770477 | -1.424047 | -1.095636 |
| 28 | 1  | 0 | -7.818894 | 0.741329  | 0.583586  |
| 29 | 1  | 0 | 2.870790  | 1.925454  | -1.284869 |
| 30 | 1  | 0 | 2.537144  | -1.059762 | 1.764522  |
| 31 | 1  | 0 | 4.411970  | -2.367906 | 2.425317  |
| 32 | 1  | 0 | 5.542944  | -2.727455 | 1.110654  |
| 33 | 1  | 0 | 5.969657  | -1.529854 | 2.322195  |
| 34 | 1  | 0 | 6.353588  | 2.165697  | -1.353793 |
| 35 | 1  | 0 | 4.928836  | 2.360463  | -2.370471 |
| 36 | 1  | 0 | 5.971195  | 0.958582  | -2.588546 |
| 37 | 6  | 0 | -3.331787 | 2.010449  | 1.335028  |
| 38 | 1  | 0 | -4.347887 | 2.323729  | 1.555928  |
| 39 | 1  | 0 | -2.810436 | 1.834478  | 2.282329  |
| 40 | 1  | 0 | -2.821903 | 2.830933  | 0.818043  |

**Data 7:** Cartesian coordinates and energies of the optimized geometry for the *s-trans*-conformer of (Z)-HL<sup>2</sup> (DMSO solution).

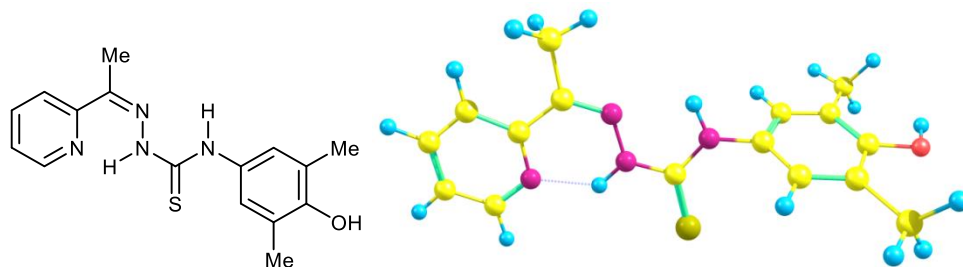

|                                               |                             |
|-----------------------------------------------|-----------------------------|
| Electronic Energy =                           | -1313.25257029 a.u.         |
| Zero-point correction =                       | 0.318281 (Hartree/Particle) |
| Thermal correction to Energy =                | 0.339815                    |
| Thermal correction to Enthalpy =              | 0.340760                    |
| Thermal correction to Gibbs Free Energy =     | 0.265192                    |
| Sum of electronic and zero-point Energies =   | -1312.934290                |
| Sum of electronic and thermal Energies =      | -1312.912755                |
| Sum of electronic and thermal Enthalpies =    | -1312.911811                |
| Sum of electronic and thermal Free Energies = | -1312.987378                |

Standard orientation:

| Center Number | Atomic Number | Atomic Type | Coordinates (Angstroms) |           |           |
|---------------|---------------|-------------|-------------------------|-----------|-----------|
|               |               |             | X                       | Y         | Z         |
| 1             | 6             | 0           | -6.410224               | -1.080010 | -0.432918 |
| 2             | 6             | 0           | -6.607361               | 0.202899  | 0.068490  |
| 3             | 6             | 0           | -5.502355               | 0.987009  | 0.379325  |
| 4             | 6             | 0           | -4.212560               | 0.468127  | 0.181190  |
| 5             | 7             | 0           | -4.033946               | -0.779569 | -0.306846 |
| 6             | 6             | 0           | -5.101108               | -1.523623 | -0.602092 |
| 7             | 7             | 0           | -1.773092               | 0.924599  | 0.373502  |
| 8             | 7             | 0           | -1.434183               | -0.301527 | -0.098492 |
| 9             | 6             | 0           | -0.117439               | -0.641758 | -0.240484 |
| 10            | 16            | 0           | 0.271161                | -2.173785 | -0.862446 |
| 11            | 7             | 0           | 0.762942                | 0.305994  | 0.126926  |
| 12            | 6             | 0           | 2.189618                | 0.220319  | 0.091296  |
| 13            | 6             | 0           | 2.898819                | 1.053776  | -0.768989 |
| 14            | 6             | 0           | 4.295905                | 1.043256  | -0.791982 |
| 15            | 6             | 0           | 4.963262                | 0.161991  | 0.071443  |
| 16            | 6             | 0           | 4.269392                | -0.684953 | 0.951040  |
| 17            | 6             | 0           | 2.876708                | -0.635367 | 0.951429  |
| 18            | 6             | 0           | 5.025555                | -1.609660 | 1.869881  |
| 19            | 6             | 0           | 5.067496                | 1.947790  | -1.721892 |
| 20            | 8             | 0           | 6.333425                | 0.084516  | 0.106672  |
| 21            | 6             | 0           | -3.011831               | 1.282255  | 0.503719  |
| 22            | 1             | 0           | -2.180752               | -0.951322 | -0.364786 |
| 23            | 1             | 0           | 0.342082                | 1.185009  | 0.414356  |
| 24            | 1             | 0           | 6.722323                | 0.695671  | -0.529560 |
| 25            | 1             | 0           | -7.242775               | -1.723393 | -0.687660 |
| 26            | 1             | 0           | -7.608059               | 0.591067  | 0.216726  |
| 27            | 1             | 0           | -5.643799               | 1.984709  | 0.769254  |
| 28            | 1             | 0           | -4.898844               | -2.516690 | -0.990431 |
| 29            | 1             | 0           | 2.358921                | 1.719658  | -1.433122 |
| 30            | 1             | 0           | 2.319688                | -1.271175 | 1.629049  |
| 31            | 1             | 0           | 4.337318                | -2.183091 | 2.492449  |
| 32            | 1             | 0           | 5.643532                | -2.312914 | 1.303556  |
| 33            | 1             | 0           | 5.701515                | -1.053112 | 2.525748  |
| 34            | 1             | 0           | 5.723684                | 2.633349  | -1.173533 |
| 35            | 1             | 0           | 4.387590                | 2.556748  | -2.318225 |
| 36            | 1             | 0           | 5.692435                | 1.379300  | -2.420095 |
| 37            | 6             | 0           | -3.212490               | 2.677700  | 1.041797  |
| 38            | 1             | 0           | -2.241742               | 3.135810  | 1.223259  |
| 39            | 1             | 0           | -3.765886               | 3.302648  | 0.334752  |
| 40            | 1             | 0           | -3.773563               | 2.667179  | 1.980875  |

**Data 8:** Cartesian coordinates and energies of the optimized geometry for the *s-cis*-conformer of (Z)-HL<sup>2</sup> (DMSO solution).

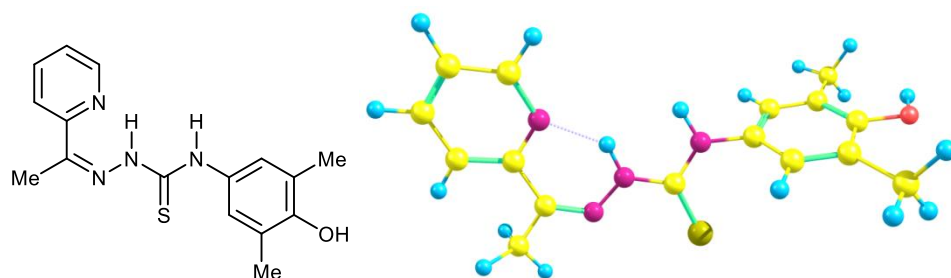

Electronic Energy = -1313.24330419 a.u.  
 Zero-point correction = 0.317896 (Hartree/Particle)  
 Thermal correction to Energy = 0.339566  
 Thermal correction to Enthalpy = 0.340511  
 Thermal correction to Gibbs Free Energy = 0.264186

Sum of electronic and zero-point Energies = -1312.925408  
 Sum of electronic and thermal Energies = -1312.903738  
 Sum of electronic and thermal Enthalpies = -1312.902794  
 Sum of electronic and thermal Free Energies = -1312.979118

Standard orientation:

| Center<br>Number | Atomic<br>Number | Atomic<br>Type | Coordinates (Angstroms) |           |           |
|------------------|------------------|----------------|-------------------------|-----------|-----------|
|                  |                  |                | X                       | Y         | Z         |
| 1                | 6                | 0              | -5.265614               | 2.595963  | 0.614420  |
| 2                | 6                | 0              | -6.139591               | 1.540176  | 0.372104  |
| 3                | 6                | 0              | -5.622708               | 0.285023  | 0.073205  |
| 4                | 6                | 0              | -4.230506               | 0.107217  | 0.022150  |
| 5                | 7                | 0              | -3.393045               | 1.141949  | 0.259285  |
| 6                | 6                | 0              | -3.898641               | 2.343475  | 0.545251  |
| 7                | 7                | 0              | -2.385738               | -1.527886 | -0.366184 |
| 8                | 7                | 0              | -1.438056               | -0.586607 | -0.149963 |
| 9                | 6                | 0              | -0.102499               | -0.883642 | -0.208685 |
| 10               | 16               | 0              | 0.522143                | -2.431693 | -0.473768 |
| 11               | 7                | 0              | 0.670416                | 0.220031  | -0.031880 |
| 12               | 6                | 0              | 2.100730                | 0.266945  | 0.011173  |
| 13               | 6                | 0              | 2.793783                | 0.896297  | -1.018529 |
| 14               | 6                | 0              | 4.185503                | 1.017620  | -0.980101 |
| 15               | 6                | 0              | 4.863978                | 0.478230  | 0.122577  |
| 16               | 6                | 0              | 4.185697                | -0.158380 | 1.175215  |
| 17               | 6                | 0              | 2.797124                | -0.246595 | 1.104454  |
| 18               | 6                | 0              | 4.953205                | -0.716403 | 2.345965  |
| 19               | 6                | 0              | 4.940637                | 1.701698  | -2.093734 |
| 20               | 8                | 0              | 6.230098                | 0.548924  | 0.234549  |
| 21               | 6                | 0              | -3.643379               | -1.222519 | -0.292327 |
| 22               | 1                | 0              | -1.781355               | 0.363106  | 0.064912  |
| 23               | 1                | 0              | 0.200160                | 1.116575  | -0.000612 |
| 24               | 1                | 0              | 6.607912                | 0.999767  | -0.529362 |
| 25               | 1                | 0              | -5.627116               | 3.588640  | 0.850718  |
| 26               | 1                | 0              | -7.211920               | 1.689744  | 0.414739  |
| 27               | 1                | 0              | -6.292609               | -0.541149 | -0.116540 |
| 28               | 1                | 0              | -3.178423               | 3.134827  | 0.726201  |
| 29               | 1                | 0              | 2.246167                | 1.296569  | -1.864667 |
| 30               | 1                | 0              | 2.250080                | -0.723377 | 1.909063  |
| 31               | 1                | 0              | 4.274769                | -1.159496 | 3.076376  |
| 32               | 1                | 0              | 5.661903                | -1.485689 | 2.024738  |
| 33               | 1                | 0              | 5.537487                | 0.061813  | 2.845721  |
| 34               | 1                | 0              | 5.508823                | 2.566226  | -1.731720 |
| 35               | 1                | 0              | 4.253452                | 2.062833  | -2.859289 |
| 36               | 1                | 0              | 5.647741                | 1.023466  | -2.584788 |
| 37               | 6                | 0              | -4.584579               | -2.372256 | -0.561185 |
| 38               | 1                | 0              | -5.232481               | -2.168287 | -1.418959 |
| 39               | 1                | 0              | -4.002787               | -3.267895 | -0.772074 |
| 40               | 1                | 0              | -5.230749               | -2.571493 | 0.298905  |

**Data 9:** Cartesian coordinates and energies of the optimized geometry for the *s-trans*-conformer of (*E*)-HL<sup>3</sup> (DMSO solution).

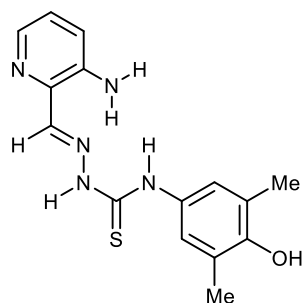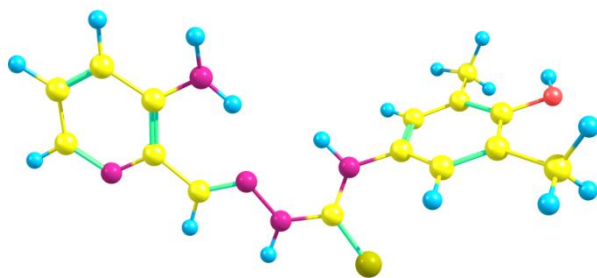

Electronic Energy = -1329.3054550 a.u.  
 Zero-point correction = 0.306858 (Hartree/Particle)  
 Thermal correction to Energy = 0.328532  
 Thermal correction to Enthalpy = 0.329476  
 Thermal correction to Gibbs Free Energy = 0.253551  
 Sum of electronic and zero-point Energies = -1328.998597  
 Sum of electronic and thermal Energies = -1328.976923  
 Sum of electronic and thermal Enthalpies = -1328.975979  
 Sum of electronic and thermal Free Energies = -1329.051904

Standard orientation:

| Center Number | Atomic Number | Atomic Type | Coordinates (Angstroms) |           |           |
|---------------|---------------|-------------|-------------------------|-----------|-----------|
|               |               |             | X                       | Y         | Z         |
| 1             | 6             | 0           | 6.502298                | -1.495965 | 0.291889  |
| 2             | 6             | 0           | 5.263337                | -2.009369 | 0.618894  |
| 3             | 6             | 0           | 4.108585                | -1.219080 | 0.454614  |
| 4             | 6             | 0           | 4.295128                | 0.101109  | -0.044809 |
| 5             | 7             | 0           | 5.519877                | 0.584917  | -0.352840 |
| 6             | 6             | 0           | 6.587870                | -0.184806 | -0.196071 |
| 7             | 7             | 0           | 1.969237                | 0.815349  | -0.088513 |
| 8             | 7             | 0           | 1.116415                | 1.860853  | -0.299114 |
| 9             | 6             | 0           | -0.241329               | 1.713164  | -0.305812 |
| 10            | 16            | 0           | -1.206783               | 3.085740  | -0.558735 |
| 11            | 7             | 0           | -0.684852               | 0.456051  | -0.120611 |
| 12            | 6             | 0           | -2.046045               | 0.023295  | -0.051515 |
| 13            | 6             | 0           | -2.514720               | -0.885563 | -0.996000 |
| 14            | 6             | 0           | -3.819528               | -1.380891 | -0.931153 |
| 15            | 6             | 0           | -4.646298               | -0.928175 | 0.107532  |
| 16            | 6             | 0           | -4.193153               | -0.015211 | 1.073925  |
| 17            | 6             | 0           | -2.881048               | 0.444669  | 0.982313  |
| 18            | 6             | 0           | -5.110807               | 0.437394  | 2.180299  |
| 19            | 6             | 0           | -4.330263               | -2.367070 | -1.953188 |
| 20            | 8             | 0           | -5.943184               | -1.358144 | 0.238364  |
| 21            | 6             | 0           | 3.224963                | 1.063408  | -0.253867 |
| 22            | 1             | 0           | 1.476323                | 2.785633  | -0.514897 |
| 23            | 1             | 0           | 0.029670                | -0.262045 | -0.112447 |
| 24            | 1             | 0           | -6.164364               | -1.982536 | -0.462217 |
| 25            | 1             | 0           | 7.397980                | -2.093235 | 0.412733  |
| 26            | 1             | 0           | 5.163994                | -3.019334 | 1.001713  |
| 27            | 1             | 0           | 7.547654                | 0.248053  | -0.459221 |
| 28            | 1             | 0           | -1.859425               | -1.212276 | -1.795912 |
| 29            | 1             | 0           | -2.505532               | 1.138561  | 1.724363  |
| 30            | 1             | 0           | -4.595012               | 1.123877  | 2.853131  |
| 31            | 1             | 0           | -5.992413               | 0.947024  | 1.779932  |
| 32            | 1             | 0           | -5.475829               | -0.411161 | 2.766252  |
| 33            | 1             | 0           | -5.179800               | -1.966870 | -2.518132 |

|    |   |   |           |           |           |
|----|---|---|-----------|-----------|-----------|
| 34 | 1 | 0 | -4.654219 | -3.305684 | -1.489276 |
| 35 | 1 | 0 | -3.549666 | -2.613922 | -2.673213 |
| 36 | 1 | 0 | 3.567218  | 2.051754  | -0.570221 |
| 37 | 7 | 0 | 2.869659  | -1.728843 | 0.733710  |
| 38 | 1 | 0 | 2.102874  | -1.076942 | 0.812224  |
| 39 | 1 | 0 | 2.818262  | -2.557320 | 1.307301  |

**Data 10:** Cartesian coordinates and energies of the optimized geometry for the *s-cis*-conformer of (*E*)-HL<sup>3</sup> (DMSO solution).

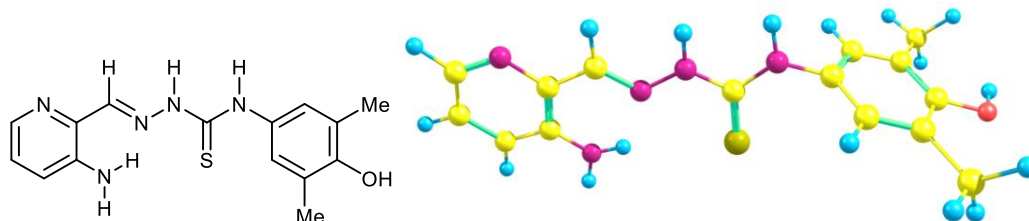

|                                               |                             |
|-----------------------------------------------|-----------------------------|
| Electronic Energy =                           | -1329.29878937 a.u.         |
| Zero-point correction =                       | 0.306062 (Hartree/Particle) |
| Thermal correction to Energy =                | 0.328048                    |
| Thermal correction to Enthalpy =              | 0.328992                    |
| Thermal correction to Gibbs Free Energy =     | 0.251925                    |
| Sum of electronic and zero-point Energies =   | -1328.992727                |
| Sum of electronic and thermal Energies =      | -1328.970742                |
| Sum of electronic and thermal Enthalpies =    | -1328.969798                |
| Sum of electronic and thermal Free Energies = | -1329.046864                |

Standard orientation:

| Center Number | Atomic Number | Atomic Type | Coordinates (Angstroms) |           |           |
|---------------|---------------|-------------|-------------------------|-----------|-----------|
|               |               |             | X                       | Y         | Z         |
| 1             | 6             | 0           | -7.234294               | 0.201152  | 0.193219  |
| 2             | 6             | 0           | -6.252195               | 0.843318  | 0.920859  |
| 3             | 6             | 0           | -4.891992               | 0.573235  | 0.662872  |
| 4             | 6             | 0           | -4.610760               | -0.369827 | -0.371339 |
| 5             | 7             | 0           | -5.589070               | -0.987337 | -1.068069 |
| 6             | 6             | 0           | -6.859578               | -0.715986 | -0.797775 |
| 7             | 7             | 0           | -2.211726               | -0.246000 | -0.228100 |
| 8             | 7             | 0           | -1.008650               | -0.660227 | -0.697430 |
| 9             | 6             | 0           | 0.171773                | -0.193375 | -0.183090 |
| 10            | 16            | 0           | 0.247867                | 0.966183  | 1.043400  |
| 11            | 7             | 0           | 1.260595                | -0.760806 | -0.758449 |
| 12            | 6             | 0           | 2.628398                | -0.447097 | -0.460335 |
| 13            | 6             | 0           | 3.375915                | -1.313056 | 0.331219  |
| 14            | 6             | 0           | 4.724431                | -1.060297 | 0.594629  |
| 15            | 6             | 0           | 5.299103                | 0.094289  | 0.041666  |
| 16            | 6             | 0           | 4.564957                | 0.979957  | -0.764296 |
| 17            | 6             | 0           | 3.224984                | 0.686299  | -1.009567 |
| 18            | 6             | 0           | 5.224754                | 2.204290  | -1.344337 |
| 19            | 6             | 0           | 5.542503                | -1.996428 | 1.450519  |
| 20            | 8             | 0           | 6.614874                | 0.417577  | 0.255895  |
| 21            | 6             | 0           | -3.264749               | -0.743629 | -0.777023 |
| 22            | 1             | 0           | -0.992527               | -1.338330 | -1.456688 |
| 23            | 1             | 0           | 1.113089                | -1.507239 | -1.427348 |
| 24            | 1             | 0           | 7.036364                | -0.240299 | 0.820859  |
| 25            | 1             | 0           | -8.282073               | 0.400972  | 0.383471  |
| 26            | 1             | 0           | -6.513498               | 1.556034  | 1.695713  |
| 27            | 1             | 0           | -7.608949               | -1.237684 | -1.384424 |
| 28            | 1             | 0           | 2.904200                | -2.194190 | 0.751608  |
| 29            | 1             | 0           | 2.636316                | 1.349464  | -1.632892 |





|    |   |   |           |           |           |
|----|---|---|-----------|-----------|-----------|
| 24 | 1 | 0 | 6.837894  | 0.792223  | -0.493832 |
| 25 | 1 | 0 | -7.117100 | -1.769348 | -0.770362 |
| 26 | 1 | 0 | -7.511388 | 0.506994  | 0.150456  |
| 27 | 1 | 0 | -4.758948 | -2.563406 | -1.063556 |
| 28 | 1 | 0 | 2.461208  | 1.774170  | -1.381397 |
| 29 | 1 | 0 | 2.461737  | -1.212571 | 1.684237  |
| 30 | 1 | 0 | 4.492941  | -2.104738 | 2.541680  |
| 31 | 1 | 0 | 5.797461  | -2.220935 | 1.349383  |
| 32 | 1 | 0 | 5.844575  | -0.959738 | 2.570622  |
| 33 | 1 | 0 | 5.819545  | 2.716695  | -1.142129 |
| 34 | 1 | 0 | 4.479581  | 2.623843  | -2.281050 |
| 35 | 1 | 0 | 5.794437  | 1.457615  | -2.383829 |
| 36 | 1 | 0 | -3.093860 | 2.101514  | 1.125705  |
| 37 | 7 | 0 | -5.638108 | 2.194880  | 0.923734  |
| 38 | 1 | 0 | -6.576638 | 2.554550  | 0.822747  |
| 39 | 1 | 0 | -4.939593 | 2.909205  | 0.786891  |

**Data 12:** Cartesian coordinates and energies of the optimized geometry for the *s-cis*-conformer of (Z)-HL<sup>3</sup> (DMSO solution).

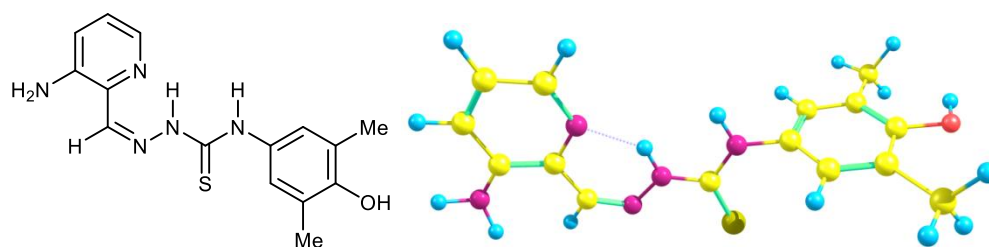

|                                               |                             |
|-----------------------------------------------|-----------------------------|
| Electronic Energy =                           | -1329.2951134 a.u.          |
| Zero-point correction =                       | 0.306872 (Hartree/Particle) |
| Thermal correction to Energy =                | 0.327593                    |
| Thermal correction to Enthalpy =              | 0.328537                    |
| Thermal correction to Gibbs Free Energy =     | 0.255784                    |
| Sum of electronic and zero-point Energies =   | -1328.988241                |
| Sum of electronic and thermal Energies =      | -1328.967520                |
| Sum of electronic and thermal Enthalpies =    | -1328.966576                |
| Sum of electronic and thermal Free Energies = | -1329.039330                |

Standard orientation:

| Center Number | Atomic Number | Atomic Type | Coordinates (Angstroms) |           |           |
|---------------|---------------|-------------|-------------------------|-----------|-----------|
|               |               |             | X                       | Y         | Z         |
| 1             | 6             | 0           | -5.276443               | 2.400869  | 0.520168  |
| 2             | 6             | 0           | -6.107099               | 1.309660  | 0.337216  |
| 3             | 6             | 0           | -5.562172               | 0.042766  | 0.068227  |
| 4             | 6             | 0           | -4.144287               | -0.047564 | -0.028787 |
| 5             | 7             | 0           | -3.356347               | 1.033314  | 0.169871  |
| 6             | 6             | 0           | -3.894585               | 2.219395  | 0.436480  |
| 7             | 7             | 0           | -2.246844               | -1.629921 | -0.450307 |
| 8             | 7             | 0           | -1.323209               | -0.675114 | -0.194089 |
| 9             | 6             | 0           | 0.021240                | -0.935349 | -0.247281 |
| 10            | 16            | 0           | 0.685412                | -2.460393 | -0.543621 |
| 11            | 7             | 0           | 0.765437                | 0.179038  | -0.033545 |
| 12            | 6             | 0           | 2.196546                | 0.245084  | 0.020273  |
| 13            | 6             | 0           | 2.901875                | 0.763753  | -1.060982 |
| 14            | 6             | 0           | 4.292373                | 0.892204  | -1.016227 |
| 15            | 6             | 0           | 4.955599                | 0.477721  | 0.148634  |
| 16            | 6             | 0           | 4.264294                | -0.044662 | 1.254106  |

|    |   |   |           |           |           |
|----|---|---|-----------|-----------|-----------|
| 17 | 6 | 0 | 2.876929  | -0.146996 | 1.171799  |
| 18 | 6 | 0 | 5.016334  | -0.471567 | 2.488229  |
| 19 | 6 | 0 | 5.063378  | 1.456339  | -2.184742 |
| 20 | 8 | 0 | 6.319302  | 0.566043  | 0.271492  |
| 21 | 6 | 0 | -3.500757 | -1.319026 | -0.364348 |
| 22 | 1 | 0 | -1.692286 | 0.265936  | 0.015381  |
| 23 | 1 | 0 | 0.275280  | 1.061351  | 0.052928  |
| 24 | 1 | 0 | 6.707331  | 0.929742  | -0.532767 |
| 25 | 1 | 0 | -5.687542 | 3.379720  | 0.733848  |
| 26 | 1 | 0 | -7.183915 | 1.419901  | 0.407567  |
| 27 | 1 | 0 | -3.208460 | 3.045916  | 0.585144  |
| 28 | 1 | 0 | 2.364437  | 1.069585  | -1.951693 |
| 29 | 1 | 0 | 2.318060  | -0.540568 | 2.012982  |
| 30 | 1 | 0 | 4.328924  | -0.840809 | 3.250600  |
| 31 | 1 | 0 | 5.734497  | -1.264819 | 2.259943  |
| 32 | 1 | 0 | 5.588043  | 0.359001  | 2.912660  |
| 33 | 1 | 0 | 5.610454  | 2.366159  | -1.912124 |
| 34 | 1 | 0 | 4.389192  | 1.715525  | -3.001414 |
| 35 | 1 | 0 | 5.791167  | 0.737989  | -2.579116 |
| 36 | 1 | 0 | -4.147854 | -2.154760 | -0.605519 |
| 37 | 7 | 0 | -6.398478 | -1.035570 | -0.147044 |
| 38 | 1 | 0 | -7.358110 | -0.910775 | 0.142395  |
| 39 | 1 | 0 | -6.053494 | -1.959148 | 0.064398  |

### Pathways of Z/E-isomerization of 2-formylpyridine thiosemicarbazone

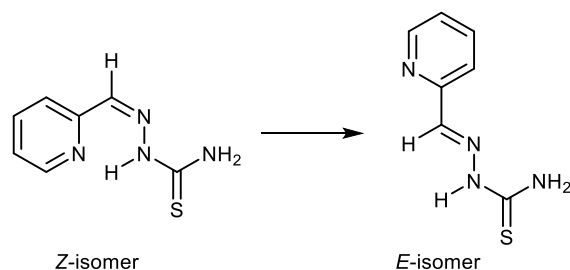

#### Pathway 1: inversion at the imine nitrogen

**Data 13:** Cartesian coordinates and energies of the optimized geometry for the *s-trans*-conformer of (*E*)-2-formylpyridine thiosemicarbazone (the gas phase).

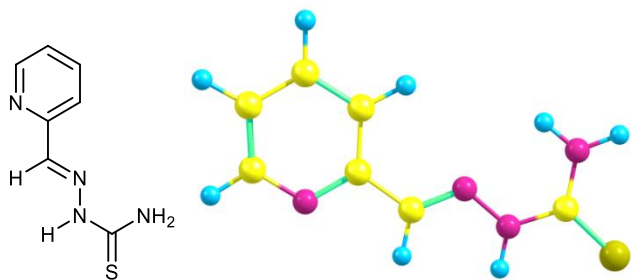

|                                             |                             |
|---------------------------------------------|-----------------------------|
| Electronic Energy =                         | -888.903948096 a.u.         |
| Zero-point correction =                     | 0.150920 (Hartree/Particle) |
| Thermal correction to Energy =              | 0.162107                    |
| Thermal correction to Enthalpy =            | 0.163051                    |
| Thermal correction to Gibbs Free Energy =   | 0.112272                    |
| Sum of electronic and zero-point Energies = | -888.753028                 |

Sum of electronic and thermal Energies = -888.741842  
 Sum of electronic and thermal Enthalpies = -888.740897  
 Sum of electronic and thermal Free Energies = -888.791676

Standard orientation:

| Center Number | Atomic Number | Atomic Type | Coordinates (Angstroms) |           |           |
|---------------|---------------|-------------|-------------------------|-----------|-----------|
|               |               |             | X                       | Y         | Z         |
| 1             | 7             | 0           | -2.734797               | 1.582155  | 0.000009  |
| 2             | 6             | 0           | -2.957665               | 0.254332  | 0.000006  |
| 3             | 16            | 0           | -4.470016               | -0.460424 | -0.000024 |
| 4             | 7             | 0           | -1.826491               | -0.527053 | 0.000034  |
| 5             | 7             | 0           | -0.584168               | 0.006379  | 0.000021  |
| 6             | 6             | 0           | 0.412457                | -0.802118 | 0.000014  |
| 7             | 6             | 0           | 1.801146                | -0.333263 | 0.000004  |
| 8             | 7             | 0           | 2.720722                | -1.313890 | -0.000000 |
| 9             | 6             | 0           | 4.008538                | -0.966137 | -0.000009 |
| 10            | 6             | 0           | 4.448645                | 0.355673  | -0.000013 |
| 11            | 6             | 0           | 3.491256                | 1.369770  | -0.000009 |
| 12            | 6             | 0           | 2.147578                | 1.026098  | -0.000001 |
| 13            | 1             | 0           | -1.792388               | 1.942562  | 0.000018  |
| 14            | 1             | 0           | -3.528899               | 2.198351  | -0.000007 |
| 15            | 1             | 0           | -1.975561               | -1.532220 | -0.000000 |
| 16            | 1             | 0           | 0.285972                | -1.887965 | 0.000015  |
| 17            | 1             | 0           | 4.722406                | -1.784850 | -0.000011 |
| 18            | 1             | 0           | 5.508357                | 0.580208  | -0.000021 |
| 19            | 1             | 0           | 3.790770                | 2.411774  | -0.000013 |
| 20            | 1             | 0           | 1.371004                | 1.779666  | 0.000003  |

**Data 14:** Cartesian coordinates and energies of the optimized geometry for the *s-trans*-conformer of (*Z*)-2-formylpyridine thiosemicarbazone (the gas phase).

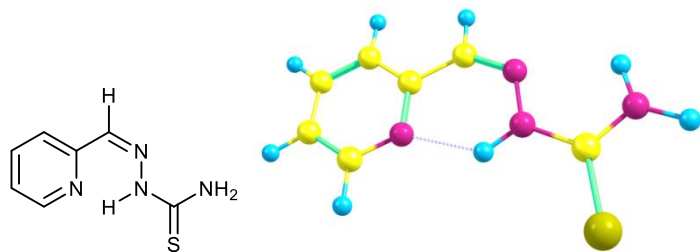

Electronic Energy = -888.907275770 a.u.  
 Zero-point correction = 0.151825 (Hartree/Particle)  
 Thermal correction to Energy = 0.162581  
 Thermal correction to Enthalpy = 0.163525  
 Thermal correction to Gibbs Free Energy = 0.114097  
 Sum of electronic and zero-point Energies = -888.755451  
 Sum of electronic and thermal Energies = -888.744695  
 Sum of electronic and thermal Enthalpies = -888.743751  
 Sum of electronic and thermal Free Energies = -888.793178

Standard orientation:

| Center Number | Atomic Number | Atomic Type | Coordinates (Angstroms) |           |           |
|---------------|---------------|-------------|-------------------------|-----------|-----------|
|               |               |             | X                       | Y         | Z         |
| 1             | 7             | 0           | 3.352750                | 1.232371  | -0.000010 |
| 2             | 6             | 0           | 2.641479                | 0.089384  | -0.000002 |
| 3             | 16            | 0           | 3.309919                | -1.444462 | 0.000003  |
| 4             | 7             | 0           | 1.273601                | 0.249257  | -0.000003 |
| 5             | 7             | 0           | 0.732573                | 1.479665  | 0.000002  |
| 6             | 6             | 0           | -0.551314               | 1.632909  | 0.000004  |
| 7             | 6             | 0           | -1.616111               | 0.627305  | 0.000002  |
| 8             | 7             | 0           | -1.286020               | -0.681378 | 0.000001  |
| 9             | 6             | 0           | -2.265084               | -1.587462 | -0.000001 |
| 10            | 6             | 0           | -3.617214               | -1.254278 | -0.000002 |
| 11            | 6             | 0           | -3.964879               | 0.095783  | -0.000001 |
| 12            | 6             | 0           | -2.956907               | 1.048777  | 0.000001  |
| 13            | 1             | 0           | 2.877856                | 2.123552  | 0.000011  |
| 14            | 1             | 0           | 4.355810                | 1.170652  | 0.000017  |
| 15            | 1             | 0           | 0.666987                | -0.574100 | -0.000006 |
| 16            | 1             | 0           | -0.871957               | 2.670365  | 0.000007  |
| 17            | 1             | 0           | -1.950236               | -2.626525 | -0.000001 |
| 18            | 1             | 0           | -4.371161               | -2.031622 | -0.000004 |
| 19            | 1             | 0           | -5.005910               | 0.398165  | -0.000002 |
| 20            | 1             | 0           | -3.190242               | 2.107003  | 0.000001  |

**Data 15:** Cartesian coordinates and energies of the optimized geometry for the *s-trans*-conformer of (*E*)-2-formylpyridine thiosemicarbazone (DMSO solution).

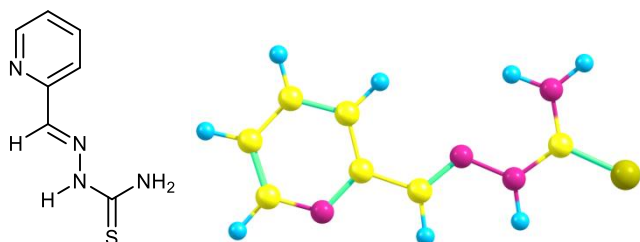

|                                               |                             |
|-----------------------------------------------|-----------------------------|
| Electronic Energy =                           | -888.919911607 a.u.         |
| Zero-point correction =                       | 0.151064 (Hartree/Particle) |
| Thermal correction to Energy =                | 0.162156                    |
| Thermal correction to Enthalpy =              | 0.163100                    |
| Thermal correction to Gibbs Free Energy =     | 0.112612                    |
| Sum of electronic and zero-point Energies =   | -888.768847                 |
| Sum of electronic and thermal Energies =      | -888.757755                 |
| Sum of electronic and thermal Enthalpies =    | -888.756811                 |
| Sum of electronic and thermal Free Energies = | -888.807299                 |

Standard orientation:

| Center Number | Atomic Number | Atomic Type | Coordinates (Angstroms) |           |           |
|---------------|---------------|-------------|-------------------------|-----------|-----------|
|               |               |             | X                       | Y         | Z         |
| 1             | 7             | 0           | -2.717623               | 1.576292  | 0.000008  |
| 2             | 6             | 0           | -2.935974               | 0.257524  | -0.000007 |
| 3             | 16            | 0           | -4.478509               | -0.448616 | 0.000014  |
| 4             | 7             | 0           | -1.827995               | -0.537936 | -0.000004 |
| 5             | 7             | 0           | -0.579445               | -0.004332 | -0.000004 |
| 6             | 6             | 0           | 0.411486                | -0.817764 | 0.000001  |

|    |   |   |           |           |           |
|----|---|---|-----------|-----------|-----------|
| 7  | 6 | 0 | 1.799823  | -0.342262 | -0.000003 |
| 8  | 7 | 0 | 2.728326  | -1.316911 | 0.000002  |
| 9  | 6 | 0 | 4.015227  | -0.956666 | -0.000001 |
| 10 | 6 | 0 | 4.441448  | 0.369791  | -0.000008 |
| 11 | 6 | 0 | 3.475508  | 1.375608  | -0.000013 |
| 12 | 6 | 0 | 2.134096  | 1.019233  | -0.000010 |
| 13 | 1 | 0 | -1.774504 | 1.939818  | 0.000007  |
| 14 | 1 | 0 | -3.502624 | 2.206044  | 0.000022  |
| 15 | 1 | 0 | -1.972931 | -1.543565 | 0.000000  |
| 16 | 1 | 0 | 0.278039  | -1.902014 | 0.000006  |
| 17 | 1 | 0 | 4.739288  | -1.765801 | 0.000003  |
| 18 | 1 | 0 | 5.498838  | 0.603361  | -0.000010 |
| 19 | 1 | 0 | 3.765088  | 2.419894  | -0.000018 |
| 20 | 1 | 0 | 1.352426  | 1.767536  | -0.000013 |

**Data 16:** Cartesian coordinates and energies of the optimized geometry for the *s-cis*-conformer of (*E*)-2-formylpyridine thiosemicarbazone (DMSO solution).

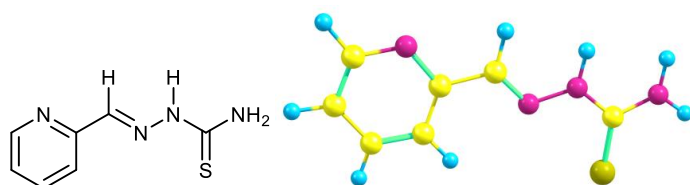

|                                              |                             |
|----------------------------------------------|-----------------------------|
| Electronic Energy =                          | -888.911230345 a.u.         |
| Zero-point correction=                       | 0.150613 (Hartree/Particle) |
| Thermal correction to Energy=                | 0.161969                    |
| Thermal correction to Enthalpy=              | 0.162913                    |
| Thermal correction to Gibbs Free Energy=     | 0.111671                    |
| Sum of electronic and zero-point Energies=   | -888.760617                 |
| Sum of electronic and thermal Energies=      | -888.749261                 |
| Sum of electronic and thermal Enthalpies=    | -888.748317                 |
| Sum of electronic and thermal Free Energies= | -888.799560                 |

Standard orientation:

| Center Number | Atomic Number | Atomic Type | Coordinates (Angstroms) |           |           |
|---------------|---------------|-------------|-------------------------|-----------|-----------|
|               |               |             | X                       | Y         | Z         |
| 1             | 7             | 0           | -4.130487               | -1.047284 | 0.000023  |
| 2             | 6             | 0           | -3.059984               | -0.229883 | -0.000024 |
| 3             | 16            | 0           | -3.224327               | 1.452494  | 0.000002  |
| 4             | 7             | 0           | -1.862075               | -0.889360 | -0.000018 |
| 5             | 7             | 0           | -0.672317               | -0.241639 | -0.000012 |
| 6             | 6             | 0           | 0.381118                | -0.970714 | -0.000006 |
| 7             | 6             | 0           | 1.724856                | -0.378338 | -0.000002 |
| 8             | 7             | 0           | 2.733813                | -1.269112 | 0.000002  |
| 9             | 6             | 0           | 3.985220                | -0.799277 | 0.000006  |
| 10            | 6             | 0           | 4.295762                | 0.558636  | 0.000007  |
| 11            | 6             | 0           | 3.246423                | 1.477387  | 0.000003  |
| 12            | 6             | 0           | 1.940673                | 1.007024  | -0.000002 |
| 13            | 1             | 0           | -4.058490               | -2.054941 | 0.000042  |
| 14            | 1             | 0           | -5.049722               | -0.636865 | 0.000056  |
| 15            | 1             | 0           | -1.859996               | -1.907882 | -0.000013 |
| 16            | 1             | 0           | 0.343549                | -2.063364 | -0.000005 |
| 17            | 1             | 0           | 4.776163                | -1.543222 | 0.000010  |
| 18            | 1             | 0           | 5.329138                | 0.882396  | 0.000011  |
| 19            | 1             | 0           | 3.445152                | 2.542735  | 0.000004  |
| 20            | 1             | 0           | 1.096496                | 1.683990  | -0.000005 |

**Data 17:** Cartesian coordinates and energies of the optimized geometry for the *s-trans*-conformer of (*Z*)-2-formylpyridine thiosemicarbazone (DMSO solution).

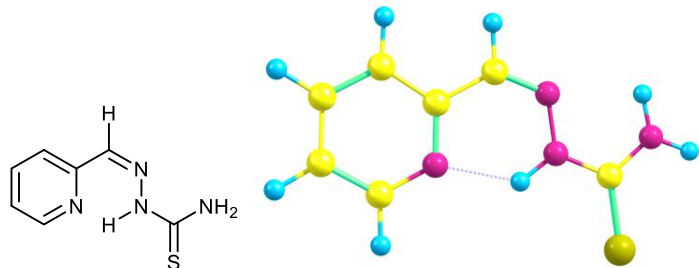

Electronic Energy = -888.922156341 a.u.  
 Zero-point correction = 0.151750 (Hartree/Particle)  
 Thermal correction to Energy = 0.162479  
 Thermal correction to Enthalpy = 0.163423  
 Thermal correction to Gibbs Free Energy = 0.114031  
 Sum of electronic and zero-point Energies = -888.770407  
 Sum of electronic and thermal Energies = -888.759678  
 Sum of electronic and thermal Enthalpies = -888.758734  
 Sum of electronic and thermal Free Energies = -888.808126

Standard orientation:

| Center Number | Atomic Number | Atomic Type | Coordinates (Angstroms) |           |           |
|---------------|---------------|-------------|-------------------------|-----------|-----------|
|               |               |             | X                       | Y         | Z         |
| 1             | 7             | 0           | -3.354941               | -1.222205 | -0.000002 |
| 2             | 6             | 0           | -2.623073               | -0.103060 | 0.000000  |
| 3             | 16            | 0           | -3.291342               | 1.458426  | -0.000000 |
| 4             | 7             | 0           | -1.269228               | -0.260841 | 0.000001  |
| 5             | 7             | 0           | -0.730347               | -1.506926 | 0.000003  |
| 6             | 6             | 0           | 0.552739                | -1.643983 | 0.000003  |
| 7             | 6             | 0           | 1.611545                | -0.627166 | 0.000001  |
| 8             | 7             | 0           | 1.271881                | 0.680435  | -0.000001 |
| 9             | 6             | 0           | 2.248054                | 1.590967  | -0.000003 |
| 10            | 6             | 0           | 3.601974                | 1.259578  | -0.000003 |
| 11            | 6             | 0           | 3.956139                | -0.087415 | -0.000002 |
| 12            | 6             | 0           | 2.950175                | -1.045724 | 0.000000  |
| 13            | 1             | 0           | -2.900226               | -2.125272 | 0.000006  |
| 14            | 1             | 0           | -4.359121               | -1.157757 | 0.000007  |
| 15            | 1             | 0           | -0.644015               | 0.551238  | -0.000001 |
| 16            | 1             | 0           | 0.886856                | -2.676953 | 0.000005  |
| 17            | 1             | 0           | 1.934210                | 2.629779  | -0.000004 |
| 18            | 1             | 0           | 4.352316                | 2.039979  | -0.000005 |
| 19            | 1             | 0           | 4.997743                | -0.385562 | -0.000002 |
| 20            | 1             | 0           | 3.186845                | -2.102676 | 0.000002  |

**Data 18:** Cartesian coordinates and energies of the optimized geometry for the *s-cis*-conformer of (*Z*)-2-formylpyridine thiosemicarbazone (DMSO solution).

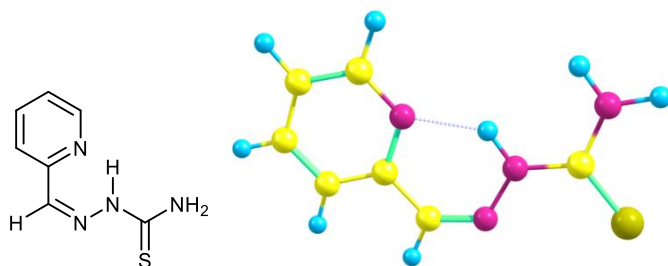

|                                               |                             |
|-----------------------------------------------|-----------------------------|
| Electronic Energy =                           | -888.914231651 a.u.         |
| Zero-point correction =                       | 0.151507 (Hartree/Particle) |
| Thermal correction to Energy =                | 0.162382                    |
| Thermal correction to Enthalpy =              | 0.163326                    |
| Thermal correction to Gibbs Free Energy =     | 0.113630                    |
| Sum of electronic and zero-point Energies =   | -888.762725                 |
| Sum of electronic and thermal Energies =      | -888.751849                 |
| Sum of electronic and thermal Enthalpies =    | -888.750905                 |
| Sum of electronic and thermal Free Energies = | -888.800602                 |

Standard orientation:

| Center Number | Atomic Number | Atomic Type | Coordinates (Angstroms) |           |           |
|---------------|---------------|-------------|-------------------------|-----------|-----------|
|               |               |             | X                       | Y         | Z         |
| 1             | 7             | 0           | 2.696044                | 1.820786  | -0.000001 |
| 2             | 6             | 0           | 2.525585                | 0.483940  | 0.000001  |
| 3             | 16            | 0           | 3.847473                | -0.574243 | -0.000003 |
| 4             | 7             | 0           | 1.214427                | 0.101239  | 0.000004  |
| 5             | 7             | 0           | 0.856849                | -1.204860 | 0.000002  |
| 6             | 6             | 0           | -0.398699               | -1.502650 | 0.000001  |
| 7             | 6             | 0           | -1.582958               | -0.633044 | 0.000000  |
| 8             | 7             | 0           | -1.415401               | 0.707772  | -0.000001 |
| 9             | 6             | 0           | -2.499605               | 1.487431  | -0.000002 |
| 10            | 6             | 0           | -3.799162               | 0.985251  | -0.000002 |
| 11            | 6             | 0           | -3.977117               | -0.396452 | -0.000000 |
| 12            | 6             | 0           | -2.857292               | -1.218606 | 0.000001  |
| 13            | 1             | 0           | 1.924127                | 2.472242  | 0.000018  |
| 14            | 1             | 0           | 3.632619                | 2.189648  | 0.000011  |
| 15            | 1             | 0           | 0.446011                | 0.788985  | 0.000006  |
| 16            | 1             | 0           | -0.596799               | -2.570236 | 0.000002  |
| 17            | 1             | 0           | -2.320305               | 2.557578  | -0.000003 |
| 18            | 1             | 0           | -4.643697               | 1.662516  | -0.000002 |
| 19            | 1             | 0           | -4.971942               | -0.825567 | 0.000000  |
| 20            | 1             | 0           | -2.957525               | -2.297054 | 0.000002  |

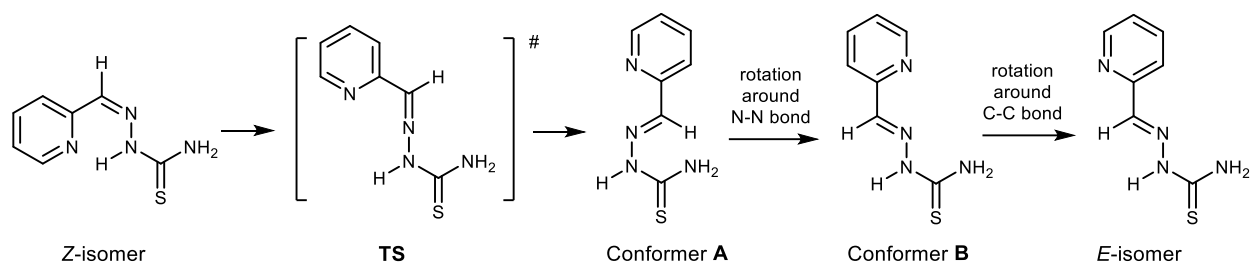

### The gas phase

**Data 19:** Cartesian coordinates, energy, imaginary frequency of the transition state for the transformation of the most stable conformer of (*Z*)-2-formylpyridine thiosemicarbazone into conformer A of the (*E*)-isomer (the gas phase).

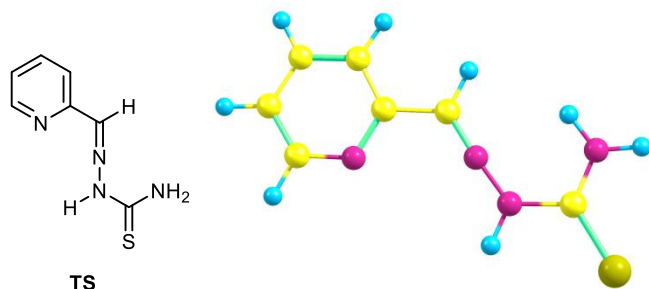

|                                               |                             |
|-----------------------------------------------|-----------------------------|
| Imaginary Frequency =                         | -389.4919 cm <sup>-1</sup>  |
| Electronic Energy =                           | -888.848199567 a.u.         |
| Zero-point correction =                       | 0.149264 (Hartree/Particle) |
| Thermal correction to Energy =                | 0.160171                    |
| Thermal correction to Enthalpy =              | 0.161115                    |
| Thermal correction to Gibbs Free Energy =     | 0.111157                    |
| Sum of electronic and zero-point Energies =   | -888.698936                 |
| Sum of electronic and thermal Energies =      | -888.688029                 |
| Sum of electronic and thermal Enthalpies =    | -888.687085                 |
| Sum of electronic and thermal Free Energies = | -888.737042                 |

Standard orientation:

| Center Number | Atomic Number | Atomic Type | Coordinates (Angstroms) |           |           |
|---------------|---------------|-------------|-------------------------|-----------|-----------|
|               |               |             | X                       | Y         | Z         |
| 1             | 7             | 0           | 2.965830                | 1.497613  | 0.000000  |
| 2             | 6             | 0           | 2.980319                | 0.153637  | 0.000000  |
| 3             | 16            | 0           | 4.336690                | -0.808205 | 0.000000  |
| 4             | 7             | 0           | 1.705393                | -0.432123 | 0.000000  |
| 5             | 7             | 0           | 0.594941                | 0.208011  | -0.000000 |
| 6             | 6             | 0           | -0.442777               | 0.917679  | -0.000000 |
| 7             | 6             | 0           | -1.815759               | 0.349077  | -0.000000 |
| 8             | 7             | 0           | -1.945175               | -0.987080 | -0.000000 |
| 9             | 6             | 0           | -3.176507               | -1.493810 | -0.000000 |
| 10            | 6             | 0           | -4.336982               | -0.716764 | 0.000000  |
| 11            | 6             | 0           | -4.199865               | 0.667919  | 0.000000  |
| 12            | 6             | 0           | -2.919823               | 1.210787  | 0.000000  |
| 13            | 1             | 0           | 2.094148                | 2.004995  | -0.000001 |
| 14            | 1             | 0           | 3.841828                | 1.990956  | -0.000001 |
| 15            | 1             | 0           | 1.704933                | -1.451068 | 0.000000  |



|    |   |   |           |           |           |
|----|---|---|-----------|-----------|-----------|
| 16 | 1 | 0 | -0.406909 | 2.020878  | -0.000001 |
| 17 | 1 | 0 | -3.245728 | -2.578534 | -0.000000 |
| 18 | 1 | 0 | -5.312012 | -1.188869 | 0.000000  |
| 19 | 1 | 0 | -5.072307 | 1.311808  | 0.000001  |
| 20 | 1 | 0 | -2.769549 | 2.285015  | 0.000000  |

**Data 20:** The intrinsic reaction coordinate analysis for the transformation of the most stable conformer of (*Z*)-2-formylpyridine thiosemicarbazone into conformer **A** of the (*E*)-isomer (the gas phase).

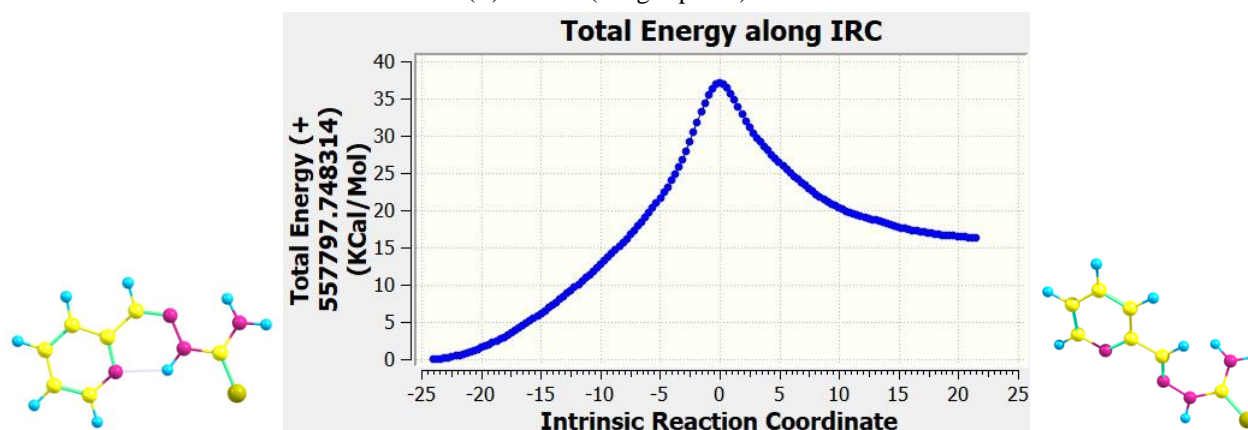

**Data 21:** Cartesian coordinates and energies of the optimized geometry for the conformer **A** of (*E*)-2-formylpyridine thiosemicarbazone (the gas phase).

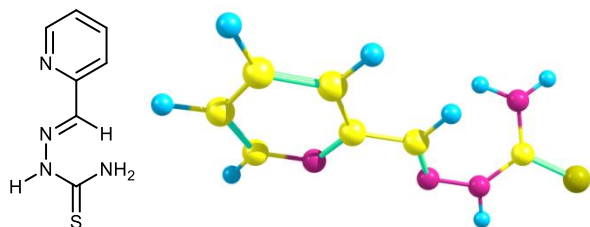

|                                               |                             |
|-----------------------------------------------|-----------------------------|
| Electronic Energy =                           | -888.881488140 a.u.         |
| Zero-point correction =                       | 0.151444 (Hartree/Particle) |
| Thermal correction to Energy =                | 0.162429                    |
| Thermal correction to Enthalpy =              | 0.163374                    |
| Thermal correction to Gibbs Free Energy =     | 0.112737                    |
| Sum of electronic and zero-point Energies =   | -888.730044                 |
| Sum of electronic and thermal Energies =      | -888.719059                 |
| Sum of electronic and thermal Enthalpies =    | -888.718115                 |
| Sum of electronic and thermal Free Energies = | -888.768751                 |

Standard orientation:

| Center Number | Atomic Number | Atomic Type | Coordinates (Angstroms) |           |           |
|---------------|---------------|-------------|-------------------------|-----------|-----------|
|               |               |             | X                       | Y         | Z         |
| 1             | 7             | 0           | -2.356166               | 1.250978  | 0.756314  |
| 2             | 6             | 0           | -2.810104               | 0.126306  | 0.130661  |
| 3             | 16            | 0           | -4.418003               | -0.105958 | -0.260216 |

|    |   |   |           |           |           |
|----|---|---|-----------|-----------|-----------|
| 4  | 7 | 0 | -1.885383 | -0.850278 | -0.171453 |
| 5  | 7 | 0 | -0.524587 | -0.919550 | -0.061724 |
| 6  | 6 | 0 | 0.203235  | 0.132558  | -0.162203 |
| 7  | 6 | 0 | 1.671161  | 0.054193  | -0.078780 |
| 8  | 7 | 0 | 2.250147  | -1.110859 | 0.254459  |
| 9  | 6 | 0 | 3.578004  | -1.152979 | 0.306566  |
| 10 | 6 | 0 | 4.404361  | -0.057224 | 0.041213  |
| 11 | 6 | 0 | 3.804036  | 1.150336  | -0.296542 |
| 12 | 6 | 0 | 2.415847  | 1.210158  | -0.355933 |
| 13 | 1 | 0 | -1.512521 | 1.203954  | 1.311998  |
| 14 | 1 | 0 | -3.088278 | 1.846683  | 1.112339  |
| 15 | 1 | 0 | -2.298364 | -1.743152 | -0.397569 |
| 16 | 1 | 0 | -0.207978 | 1.120654  | -0.368922 |
| 17 | 1 | 0 | 4.012499  | -2.111268 | 0.578849  |
| 18 | 1 | 0 | 5.481401  | -0.155776 | 0.103343  |
| 19 | 1 | 0 | 4.402297  | 2.028816  | -0.509940 |
| 20 | 1 | 0 | 1.911681  | 2.133299  | -0.619716 |

**Data 21:** Cartesian coordinates and energies of the optimized geometry for the conformer **B** of (*E*)-2-formylpyridine thiosemicarbazone (the gas phase).

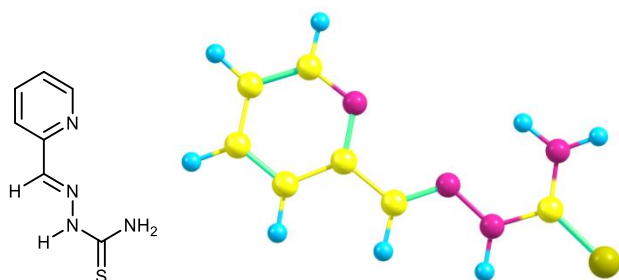

|                                               |                             |
|-----------------------------------------------|-----------------------------|
| Electronic Energy =                           | -888.900127943 a.u.         |
| Zero-point correction =                       | 0.150988 (Hartree/Particle) |
| Thermal correction to Energy =                | 0.162051                    |
| Thermal correction to Enthalpy =              | 0.162995                    |
| Thermal correction to Gibbs Free Energy =     | 0.112568                    |
| Sum of electronic and zero-point Energies =   | -888.749140                 |
| Sum of electronic and thermal Energies =      | -888.738077                 |
| Sum of electronic and thermal Enthalpies =    | -888.737133                 |
| Sum of electronic and thermal Free Energies = | -888.787560                 |

Standard orientation:

| Center Number | Atomic Number | Atomic Type | Coordinates (Angstroms) |           |           |
|---------------|---------------|-------------|-------------------------|-----------|-----------|
|               |               |             | X                       | Y         | Z         |
| 1             | 7             | 0           | -2.681565               | 1.575982  | 0.000003  |
| 2             | 6             | 0           | -2.945576               | 0.258133  | -0.000000 |
| 3             | 16            | 0           | -4.474355               | -0.421858 | -0.000003 |
| 4             | 7             | 0           | -1.831536               | -0.553033 | 0.000003  |
| 5             | 7             | 0           | -0.590195               | -0.031995 | 0.000002  |
| 6             | 6             | 0           | 0.409701                | -0.833773 | 0.000002  |
| 7             | 6             | 0           | 1.796720                | -0.354545 | 0.000001  |
| 8             | 7             | 0           | 2.027911                | 0.969899  | -0.000000 |
| 9             | 6             | 0           | 3.292873                | 1.380158  | -0.000001 |
| 10            | 6             | 0           | 4.393060                | 0.518432  | -0.000002 |
| 11            | 6             | 0           | 4.152516                | -0.851057 | -0.000001 |
| 12            | 6             | 0           | 2.835604                | -1.296996 | 0.000000  |
| 13            | 1             | 0           | -1.724493               | 1.902172  | 0.000002  |

|    |   |   |           |           |           |
|----|---|---|-----------|-----------|-----------|
| 14 | 1 | 0 | -3.454868 | 2.218010  | -0.000000 |
| 15 | 1 | 0 | -2.004097 | -1.554967 | -0.000001 |
| 16 | 1 | 0 | 0.265567  | -1.919364 | 0.000002  |
| 17 | 1 | 0 | 3.443150  | 2.456576  | -0.000002 |
| 18 | 1 | 0 | 5.400523  | 0.916396  | -0.000003 |
| 19 | 1 | 0 | 4.972819  | -1.559776 | -0.000001 |
| 20 | 1 | 0 | 2.609382  | -2.357400 | 0.000001  |

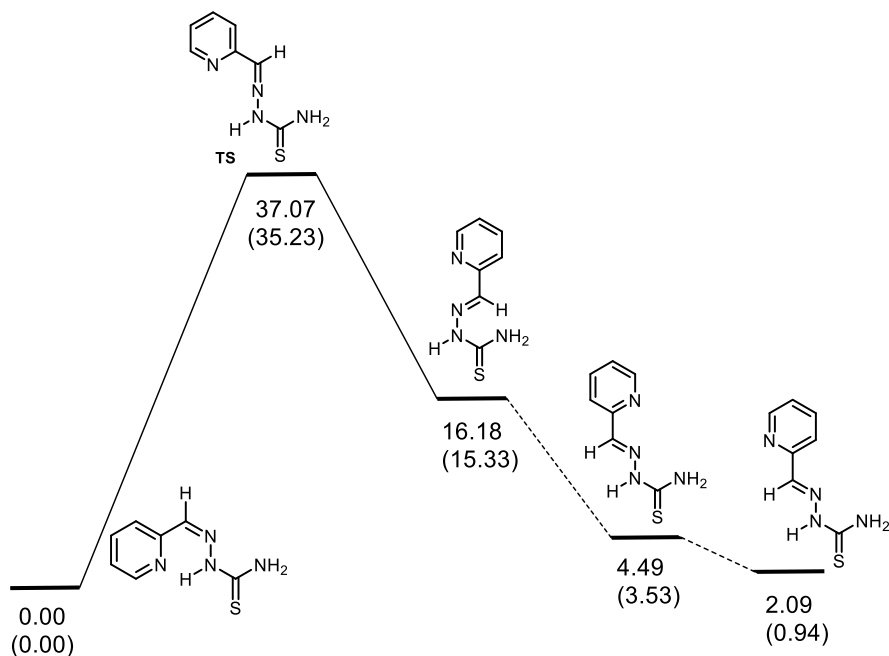

**Figure S14.** Electronic energy and Gibbs free energy profiles (in kcal/mol) for the transformation of the most stable conformer of (Z)-2-formylpyridine thiosemicarbazone into the most stable conformer of (E)-2-formylpyridine thiosemicarbazone in the gas phase. Free energies (in parentheses) at 298 K and 1 atm.

#### DMSO solution

**Data 22:** Cartesian coordinates, energy, imaginary frequency of the transition state for the transformation of the most stable conformer of (Z)-2-formylpyridine thiosemicarbazone into conformer **A** of the (E)-isomer (DMSO solution).

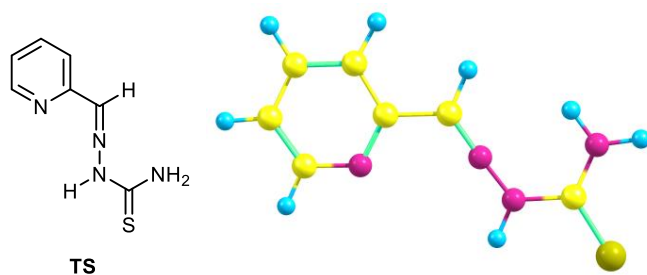

Imaginary Frequency = -414.4982  $\text{cm}^{-1}$   
 Electronic Energy = -888.86340949 a.u.  
 Zero-point correction = 0.149585 (Hartree/Particle)

Thermal correction to Energy = 0.160351  
 Thermal correction to Enthalpy = 0.161295  
 Thermal correction to Gibbs Free Energy = 0.111633  
 Sum of electronic and zero-point Energies = -888.713825  
 Sum of electronic and thermal Energies = -888.703059  
 Sum of electronic and thermal Enthalpies = -888.702115  
 Sum of electronic and thermal Free Energies = -888.751777

Standard orientation:

| Center Number | Atomic Number | Atomic Type | Coordinates (Angstroms) |           |           |
|---------------|---------------|-------------|-------------------------|-----------|-----------|
|               |               |             | X                       | Y         | Z         |
| 1             | 7             | 0           | -2.985819               | 1.496245  | 0.000000  |
| 2             | 6             | 0           | -2.975101               | 0.165038  | 0.000000  |
| 3             | 16            | 0           | -4.337983               | -0.825007 | 0.000000  |
| 4             | 7             | 0           | -1.708226               | -0.419986 | 0.000000  |
| 5             | 7             | 0           | -0.601707               | 0.233207  | 0.000000  |
| 6             | 6             | 0           | 0.449146                | 0.925383  | 0.000000  |
| 7             | 6             | 0           | 1.818901                | 0.346209  | -0.000000 |
| 8             | 7             | 0           | 1.949694                | -0.991850 | -0.000000 |
| 9             | 6             | 0           | 3.184168                | -1.498589 | -0.000000 |
| 10            | 6             | 0           | 4.342405                | -0.718836 | -0.000000 |
| 11            | 6             | 0           | 4.203748                | 0.666057  | -0.000000 |
| 12            | 6             | 0           | 2.922462                | 1.208000  | -0.000000 |
| 13            | 1             | 0           | -2.122289               | 2.021070  | 0.000000  |
| 14            | 1             | 0           | -3.863291               | 1.990142  | 0.000000  |
| 15            | 1             | 0           | -1.702486               | -1.438909 | 0.000000  |
| 16            | 1             | 0           | 0.422023                | 2.025240  | 0.000000  |
| 17            | 1             | 0           | 3.258066                | -2.582561 | -0.000000 |
| 18            | 1             | 0           | 5.317490                | -1.190032 | -0.000000 |
| 19            | 1             | 0           | 5.074986                | 1.310770  | -0.000000 |
| 20            | 1             | 0           | 2.771264                | 2.281520  | 0.000000  |

**Data 23:** The intrinsic reaction coordinate analysis for the transformation of the most stable conformer of (Z)-2-formylpyridine thiosemicarbazone into conformer **A** of the (E)-isomer (DMSO solution).

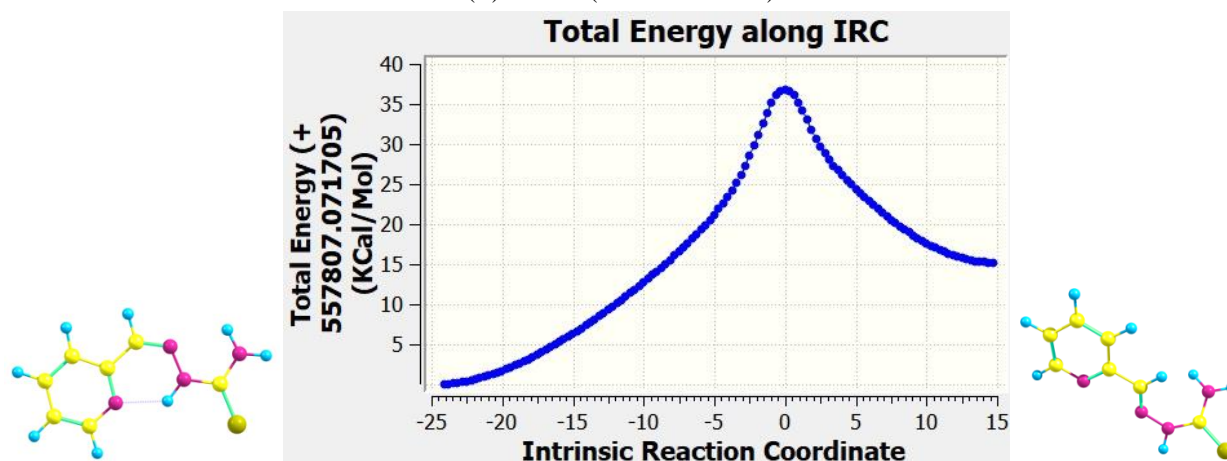

**Data 24:** Cartesian coordinates and energies of the optimized geometry for the conformer **A** of (*E*)-2-formylpyridine thiosemicarbazone (DMSO solution).

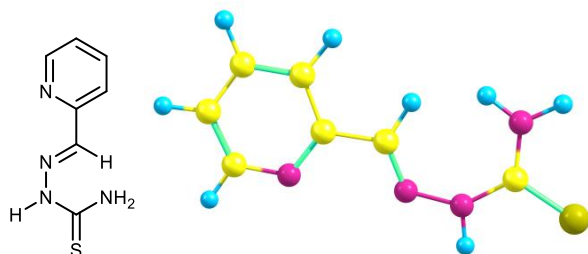

Electronic Energy = -888.897966374 a.u.  
 Zero-point correction = 0.150811 (Hartree/Particle)  
 Thermal correction to Energy = 0.161452  
 Thermal correction to Enthalpy = 0.162396  
 Thermal correction to Gibbs Free Energy = 0.112766  
 Sum of electronic and zero-point Energies = -888.747156  
 Sum of electronic and thermal Energies = -888.736515  
 Sum of electronic and thermal Enthalpies = -888.735570  
 Sum of electronic and thermal Free Energies = -888.785200

Standard orientation:

| Center Number | Atomic Number | Atomic Type | Coordinates (Angstroms) |           |           |
|---------------|---------------|-------------|-------------------------|-----------|-----------|
|               |               |             | X                       | Y         | Z         |
| 1             | 7             | 0           | -2.864719               | -0.820168 | -0.000000 |
| 2             | 6             | 0           | -2.123072               | -1.933289 | -0.000000 |
| 3             | 16            | 0           | -2.837293               | -3.476619 | -0.000000 |
| 4             | 7             | 0           | -0.748796               | -1.871613 | -0.000000 |
| 5             | 7             | 0           | 0.205122                | -0.900508 | -0.000000 |
| 6             | 6             | 0           | -0.000000               | 0.363051  | 0.000000  |
| 7             | 6             | 0           | 1.134085                | 1.308227  | 0.000000  |
| 8             | 7             | 0           | 2.392453                | 0.833437  | 0.000000  |
| 9             | 6             | 0           | 3.391405                | 1.715387  | 0.000000  |
| 10            | 6             | 0           | 3.206029                | 3.100291  | 0.000000  |
| 11            | 6             | 0           | 1.904518                | 3.588995  | 0.000000  |
| 12            | 6             | 0           | 0.850487                | 2.680380  | 0.000000  |
| 13            | 1             | 0           | -2.499441               | 0.115232  | 0.000000  |
| 14            | 1             | 0           | -3.867145               | -0.926229 | -0.000000 |
| 15            | 1             | 0           | -0.326615               | -2.788951 | -0.000000 |
| 16            | 1             | 0           | -0.968809               | 0.853351  | 0.000000  |
| 17            | 1             | 0           | 4.395536                | 1.300964  | 0.000000  |
| 18            | 1             | 0           | 4.060745                | 3.765154  | 0.000000  |
| 19            | 1             | 0           | 1.710274                | 4.654982  | 0.000000  |
| 20            | 1             | 0           | -0.177001               | 3.025125  | 0.000000  |

**Data 25:** Cartesian coordinates and energies of the optimized geometry for the conformer **B** of (*E*)-2-formylpyridine thiosemicarbazone (DMSO solution).

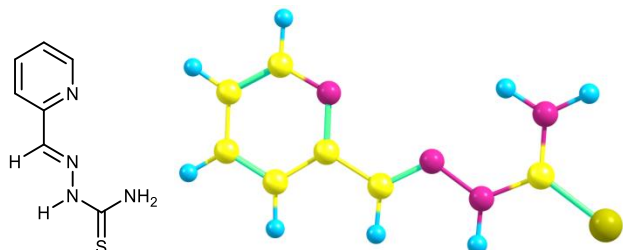

|                                               |                             |
|-----------------------------------------------|-----------------------------|
| Electronic Energy =                           | -888.917947875 a.u.         |
| Zero-point correction =                       | 0.151125 (Hartree/Particle) |
| Thermal correction to Energy =                | 0.162198                    |
| Thermal correction to Enthalpy =              | 0.163142                    |
| Thermal correction to Gibbs Free Energy =     | 0.112708                    |
| Sum of electronic and zero-point Energies =   | -888.766823                 |
| Sum of electronic and thermal Energies =      | -888.755750                 |
| Sum of electronic and thermal Enthalpies =    | -888.754806                 |
| Sum of electronic and thermal Free Energies = | -888.805240                 |

Standard orientation:

| Center Number | Atomic Number | Atomic Type | Coordinates (Angstroms) |           |           |
|---------------|---------------|-------------|-------------------------|-----------|-----------|
|               |               |             | X                       | Y         | Z         |
| 1             | 7             | 0           | -2.727373               | 1.579333  | 0.000001  |
| 2             | 6             | 0           | -2.942013               | 0.260090  | -0.000003 |
| 3             | 16            | 0           | -4.482412               | -0.451424 | 0.000002  |
| 4             | 7             | 0           | -1.830685               | -0.530703 | -0.000002 |
| 5             | 7             | 0           | -0.585746               | 0.012272  | -0.000002 |
| 6             | 6             | 0           | 0.407138                | -0.798590 | -0.000000 |
| 7             | 6             | 0           | 1.801646                | -0.337079 | -0.000000 |
| 8             | 7             | 0           | 2.057565                | 0.984829  | -0.000001 |
| 9             | 6             | 0           | 3.332481                | 1.371438  | 0.000000  |
| 10            | 6             | 0           | 4.413525                | 0.485584  | 0.000001  |
| 11            | 6             | 0           | 4.146643                | -0.878782 | 0.000001  |
| 12            | 6             | 0           | 2.820079                | -1.299289 | 0.000001  |
| 13            | 1             | 0           | -1.783987               | 1.942872  | 0.000001  |
| 14            | 1             | 0           | -3.513559               | 2.207549  | 0.000004  |
| 15            | 1             | 0           | -1.971865               | -1.537094 | -0.000001 |
| 16            | 1             | 0           | 0.254588                | -1.880815 | -0.000001 |
| 17            | 1             | 0           | 3.507749                | 2.443456  | -0.000000 |
| 18            | 1             | 0           | 5.428133                | 0.863888  | 0.000001  |
| 19            | 1             | 0           | 4.952269                | -1.603356 | 0.000002  |
| 20            | 1             | 0           | 2.571949                | -2.354056 | 0.000001  |

**Pathway 2:** via tautomeric shift

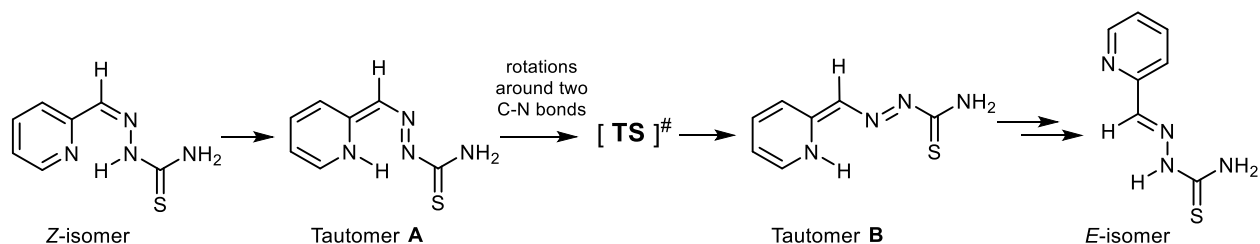

**Data 26:** Cartesian coordinates and energies of the optimized geometry for the tautomer **A** formed via tautomeric shift in *s-trans*-conformer of (Z)-2-formylpyridine thiosemicarbazone (the gas phase).

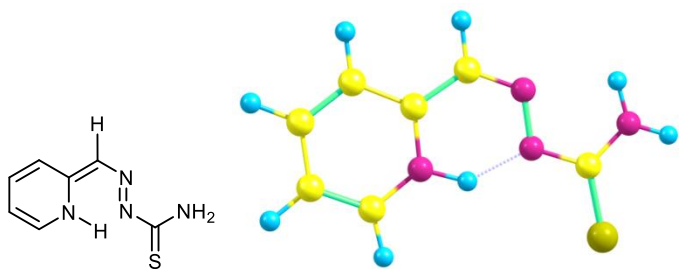

Electronic Energy = -888.8852658404 a.u.  
 Zero-point correction = 0.150269 (Hartree/Particle)  
 Thermal correction to Energy = 0.160867  
 Thermal correction to Enthalpy = 0.161811  
 Thermal correction to Gibbs Free Energy = 0.112901  
 Sum of electronic and zero-point Energies = -888.734997  
 Sum of electronic and thermal Energies = -888.724399  
 Sum of electronic and thermal Enthalpies = -888.723455  
 Sum of electronic and thermal Free Energies = -888.772365

Standard orientation:

| Center Number | Atomic Number | Atomic Type | Coordinates (Angstroms) |           |           |
|---------------|---------------|-------------|-------------------------|-----------|-----------|
|               |               |             | X                       | Y         | Z         |
| 1             | 7             | 0           | -3.328544               | -1.188378 | -0.000003 |
| 2             | 6             | 0           | -2.550630               | -0.086955 | 0.000001  |
| 3             | 16            | 0           | -3.163957               | 1.475238  | -0.000001 |
| 4             | 7             | 0           | -1.175554               | -0.265794 | 0.000003  |
| 5             | 7             | 0           | -0.770731               | -1.517454 | 0.000006  |
| 6             | 6             | 0           | 0.539792                | -1.732737 | 0.000005  |
| 7             | 6             | 0           | 1.559622                | -0.739482 | 0.000001  |
| 8             | 7             | 0           | 1.200273                | 0.582147  | 0.000001  |
| 9             | 6             | 0           | 2.092972                | 1.592671  | -0.000002 |
| 10            | 6             | 0           | 3.441755                | 1.336077  | -0.000005 |
| 11            | 6             | 0           | 3.866706                | -0.011252 | -0.000005 |
| 12            | 6             | 0           | 2.945464                | -1.032573 | -0.000001 |
| 13            | 1             | 0           | -2.891987               | -2.099465 | 0.000003  |
| 14            | 1             | 0           | -4.327880               | -1.082147 | 0.000001  |
| 15            | 1             | 0           | 0.848307                | -2.770547 | 0.000007  |
| 16            | 1             | 0           | 1.675192                | 2.591108  | -0.000001 |
| 17            | 1             | 0           | 4.151187                | 2.151905  | -0.000008 |
| 18            | 1             | 0           | 4.926153                | -0.240043 | -0.000007 |
| 19            | 1             | 0           | 3.257462                | -2.069178 | -0.000001 |
| 20            | 1             | 0           | 0.132675                | 0.686420  | 0.000004  |

**Data 27:** Cartesian coordinates, energy, imaginary frequency of the transition state for the transformation of the tautomer **A** into the tautomer **B** (the gas phase).

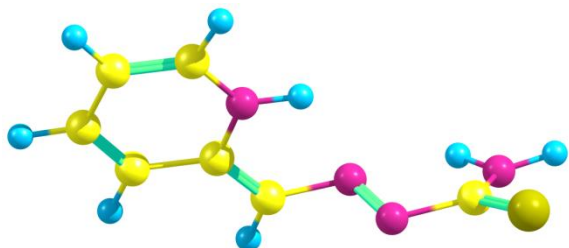

|                                               |                             |
|-----------------------------------------------|-----------------------------|
| Imaginary Frequency =                         | -519.9298 cm <sup>-1</sup>  |
| Electronic Energy =                           | -888.829551222 a.u.         |
| Zero-point correction =                       | 0.148768 (Hartree/Particle) |
| Thermal correction to Energy =                | 0.159665                    |
| Thermal correction to Enthalpy =              | 0.160610                    |
| Thermal correction to Gibbs Free Energy =     | 0.109717                    |
| Sum of electronic and zero-point Energies =   | -888.680783                 |
| Sum of electronic and thermal Energies =      | -888.669886                 |
| Sum of electronic and thermal Enthalpies =    | -888.668942                 |
| Sum of electronic and thermal Free Energies = | -888.719834                 |

Standard orientation:

| Center Number | Atomic Number | Atomic Type | Coordinates (Angstroms) |           |           |
|---------------|---------------|-------------|-------------------------|-----------|-----------|
|               |               |             | X                       | Y         | Z         |
| 1             | 7             | 0           | -3.253799               | -0.936688 | 1.023174  |
| 2             | 6             | 0           | -2.813325               | -0.124869 | 0.052076  |
| 3             | 16            | 0           | -3.583918               | 1.198469  | -0.562451 |
| 4             | 7             | 0           | -1.523356               | -0.474764 | -0.522372 |
| 5             | 7             | 0           | -0.774763               | -1.058262 | 0.284785  |
| 6             | 6             | 0           | 0.514532                | -1.425210 | -0.233039 |
| 7             | 6             | 0           | 1.601274                | -0.625903 | -0.111951 |
| 8             | 7             | 0           | 1.508920                | 0.683542  | 0.389800  |
| 9             | 6             | 0           | 2.587452                | 1.516014  | 0.547240  |
| 10            | 6             | 0           | 3.839015                | 1.119526  | 0.217436  |
| 11            | 6             | 0           | 4.005819                | -0.206581 | -0.320572 |
| 12            | 6             | 0           | 2.945073                | -1.033211 | -0.479104 |
| 13            | 1             | 0           | -2.599089               | -1.587714 | 1.439544  |
| 14            | 1             | 0           | -4.118286               | -0.718136 | 1.492070  |
| 15            | 1             | 0           | 0.588179                | -2.441093 | -0.596501 |
| 16            | 1             | 0           | 2.359419                | 2.496926  | 0.943722  |
| 17            | 1             | 0           | 4.677726                | 1.787944  | 0.346960  |
| 18            | 1             | 0           | 4.996642                | -0.544668 | -0.601992 |
| 19            | 1             | 0           | 3.067873                | -2.030413 | -0.883081 |
| 20            | 1             | 0           | 0.592176                | 1.046264  | 0.598270  |

**Data 28:** Cartesian coordinates and energies of the optimized geometry for the tautomer **B** formed from the tautomer **A** (the gas phase).



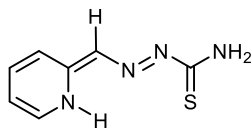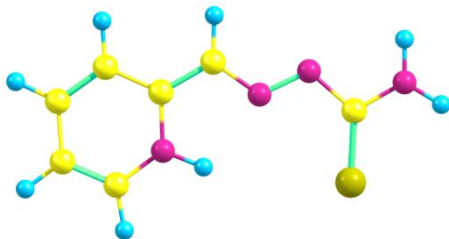

Electronic Energy = -888.876986628 a.u.  
 Zero-point correction = 0.151034 (Hartree/Particle)  
 Thermal correction to Energy = 0.161938  
 Thermal correction to Enthalpy = 0.162883  
 Thermal correction to Gibbs Free Energy = 0.112987  
 Sum of electronic and zero-point Energies = -888.725952  
 Sum of electronic and thermal Energies = -888.715048  
 Sum of electronic and thermal Enthalpies = -888.714104  
 Sum of electronic and thermal Free Energies = -888.764000

Standard orientation:

| Center Number | Atomic Number | Atomic Type | Coordinates (Angstroms) |           |           |
|---------------|---------------|-------------|-------------------------|-----------|-----------|
|               |               |             | X                       | Y         | Z         |
| 1             | 7             | 0           | -4.118575               | -0.829948 | -0.000008 |
| 2             | 6             | 0           | -2.932777               | -0.179586 | -0.000000 |
| 3             | 16            | 0           | -2.836387               | 1.497573  | 0.000007  |
| 4             | 7             | 0           | -1.886599               | -1.114137 | 0.000002  |
| 5             | 7             | 0           | -0.723313               | -0.576802 | 0.000002  |
| 6             | 6             | 0           | 0.357087                | -1.349003 | 0.000004  |
| 7             | 6             | 0           | 1.584646                | -0.659442 | -0.000003 |
| 8             | 7             | 0           | 1.551196                | 0.717070  | -0.000011 |
| 9             | 6             | 0           | 2.650689                | 1.503200  | -0.000006 |
| 10            | 6             | 0           | 3.901749                | 0.947431  | 0.000002  |
| 11            | 6             | 0           | 4.000991                | -0.467527 | 0.000004  |
| 12            | 6             | 0           | 2.875936                | -1.252434 | 0.000001  |
| 13            | 1             | 0           | -4.127215               | -1.839041 | -0.000019 |
| 14            | 1             | 0           | -4.975450               | -0.303777 | -0.000013 |
| 15            | 1             | 0           | 0.319064                | -2.435826 | 0.000008  |
| 16            | 1             | 0           | 2.469430                | 2.569887  | -0.000012 |
| 17            | 1             | 0           | 4.779039                | 1.578110  | 0.000006  |
| 18            | 1             | 0           | 4.979780                | -0.933355 | 0.000010  |
| 19            | 1             | 0           | 2.944765                | -2.332616 | 0.000004  |
| 20            | 1             | 0           | 0.603895                | 1.106346  | -0.000006 |

**Data 29:** The intrinsic reaction coordinate analysis for the transformation of the tautomer A into the tautomer B (the gas phase).

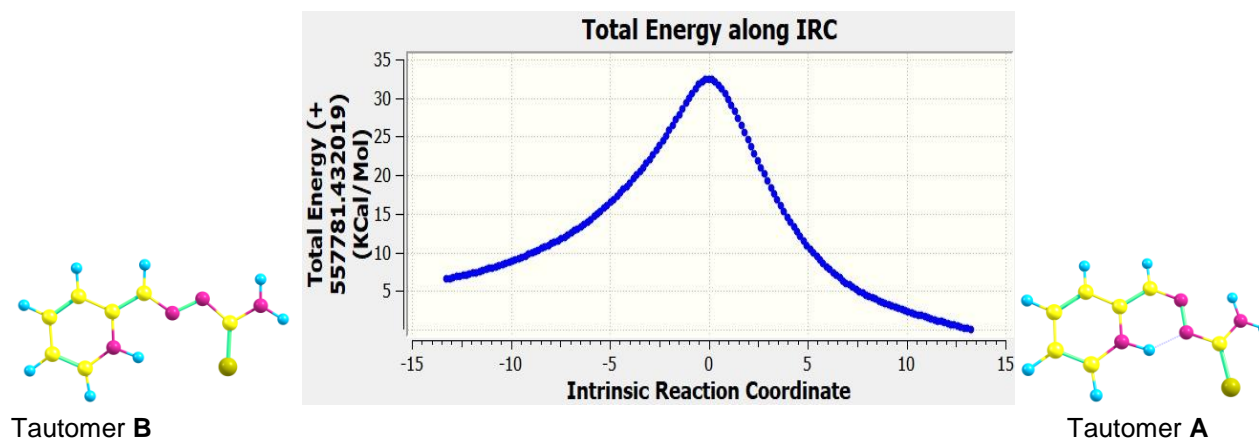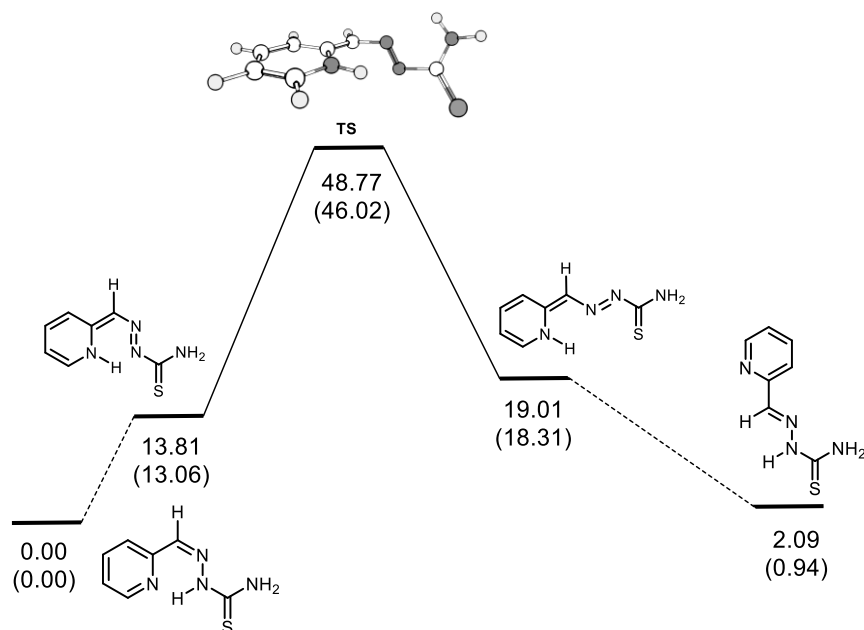

**Figure S15.** Electronic energy and Gibbs free energy profiles (in kcal/mol) for the transformation of the most stable conformer of (*Z*)-2-formylpyridine thiosemicarbazone into the most stable conformer of (*E*)-2-formylpyridine thiosemicarbazone in the gas phase. Free energies (in parentheses) at 298 K and 1 atm.

### Geometry optimization of some stereoisomers and tautomers of HL<sup>1c'</sup> (DMSO solution)

**Data 30:** Cartesian coordinates and energies of the optimized geometry for the *s-cis*-conformer (around the exocyclic C-N bond) of (*E*)-HL<sup>1c'</sup> (DMSO solution).

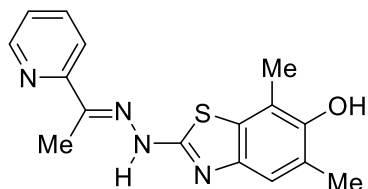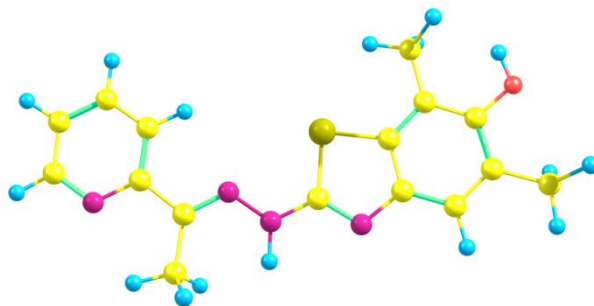

|                                               |                             |
|-----------------------------------------------|-----------------------------|
| Electronic Energy =                           | -1312.03278232 a.u.         |
| Zero-point correction =                       | 0.294370 (Hartree/Particle) |
| Thermal correction to Energy =                | 0.315455                    |
| Thermal correction to Enthalpy =              | 0.316400                    |
| Thermal correction to Gibbs Free Energy =     | 0.242121                    |
| Sum of electronic and zero-point Energies =   | -1311.738412                |
| Sum of electronic and thermal Energies =      | -1311.717327                |
| Sum of electronic and thermal Enthalpies =    | -1311.716383                |
| Sum of electronic and thermal Free Energies = | -1311.790661                |

Standard orientation:

| Center Number | Atomic Number | Atomic Type | Coordinates (Angstroms) |           |           |
|---------------|---------------|-------------|-------------------------|-----------|-----------|
|               |               |             | X                       | Y         | Z         |
| 1             | 6             | 0           | -4.682881               | 0.712121  | -0.000273 |
| 2             | 6             | 0           | -4.914397               | -0.678482 | -0.001004 |
| 3             | 6             | 0           | -3.821036               | -1.540094 | -0.000631 |
| 4             | 6             | 0           | -2.519794               | -1.030147 | 0.000239  |
| 5             | 6             | 0           | -2.331651               | 0.366295  | 0.001174  |
| 6             | 6             | 0           | -3.396275               | 1.270489  | 0.001767  |
| 7             | 6             | 0           | -6.327816               | -1.203236 | -0.002423 |
| 8             | 6             | 0           | -3.201235               | 2.766733  | 0.001988  |
| 9             | 7             | 0           | -1.357156               | -1.793646 | 0.000520  |
| 10            | 6             | 0           | -0.313353               | -1.028133 | 0.001255  |
| 11            | 16            | 0           | -0.598220               | 0.724366  | 0.001568  |
| 12            | 8             | 0           | -5.805079               | 1.508537  | -0.002297 |
| 13            | 7             | 0           | 0.968856                | -1.505303 | 0.001432  |
| 14            | 7             | 0           | 2.008329                | -0.643601 | 0.000984  |
| 15            | 1             | 0           | -5.557939               | 2.440092  | -0.000578 |
| 16            | 1             | 0           | 1.092122                | -2.512992 | 0.000244  |
| 17            | 6             | 0           | 3.211064                | -1.115437 | 0.000254  |
| 18            | 6             | 0           | 3.526957                | -2.585487 | -0.000061 |
| 19            | 6             | 0           | 4.309882                | -0.112675 | -0.000336 |
| 20            | 6             | 0           | 4.043812                | 1.267834  | -0.001395 |
| 21            | 6             | 0           | 5.106137                | 2.158655  | -0.001904 |
| 22            | 6             | 0           | 6.410095                | 1.660986  | -0.001397 |
| 23            | 6             | 0           | 6.581181                | 0.280949  | -0.000408 |
| 24            | 7             | 0           | 5.565817                | -0.590418 | 0.000106  |
| 25            | 1             | 0           | -3.973911               | -2.613502 | -0.001117 |
| 26            | 1             | 0           | -6.333046               | -2.294252 | -0.001819 |
| 27            | 1             | 0           | -6.882488               | -0.856543 | 0.874649  |
| 28            | 1             | 0           | -6.880367               | -0.857577 | -0.881253 |
| 29            | 1             | 0           | -2.144704               | 3.032473  | 0.038606  |

|    |   |   |           |           |           |
|----|---|---|-----------|-----------|-----------|
| 30 | 1 | 0 | -3.678534 | 3.237182  | 0.868929  |
| 31 | 1 | 0 | -3.617373 | 3.229446  | -0.899930 |
| 32 | 1 | 0 | 4.601888  | -2.740253 | -0.000541 |
| 33 | 1 | 0 | 3.104839  | -3.074987 | -0.884981 |
| 34 | 1 | 0 | 3.105583  | -3.075216 | 0.885080  |
| 35 | 1 | 0 | 3.020899  | 1.617682  | -0.001824 |
| 36 | 1 | 0 | 4.922775  | 3.227012  | -0.002729 |
| 37 | 1 | 0 | 7.268736  | 2.320859  | -0.001793 |
| 38 | 1 | 0 | 7.578611  | -0.149024 | -0.000015 |

**Data 31:** Cartesian coordinates and energies of the optimized geometry for the *s-trans*-conformer (around the exocyclic C-N bond) of (*E*)-**HL**<sup>1c'</sup> (DMSO solution).

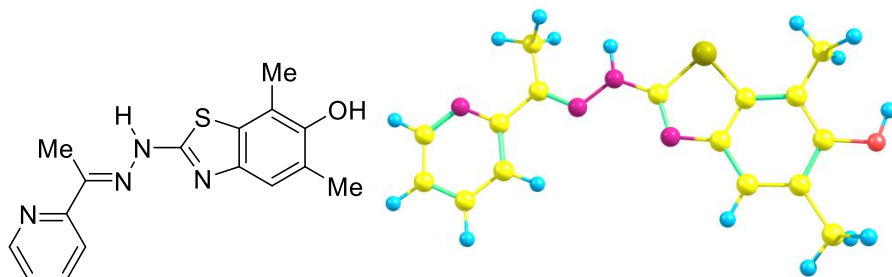

|                                               |                             |
|-----------------------------------------------|-----------------------------|
| Electronic Energy =                           | -1312.02804160 a.u.         |
| Zero-point correction =                       | 0.294415 (Hartree/Particle) |
| Thermal correction to Energy =                | 0.315485                    |
| Thermal correction to Enthalpy =              | 0.316429                    |
| Thermal correction to Gibbs Free Energy =     | 0.242521                    |
| Sum of electronic and zero-point Energies =   | -1311.733626                |
| Sum of electronic and thermal Energies =      | -1311.712557                |
| Sum of electronic and thermal Enthalpies =    | -1311.711612                |
| Sum of electronic and thermal Free Energies = | -1311.785520                |

Standard orientation:

| Center Number | Atomic Number | Atomic Type | Coordinates (Angstroms) |           |           |
|---------------|---------------|-------------|-------------------------|-----------|-----------|
|               |               |             | X                       | Y         | Z         |
| 1             | 6             | 0           | -4.773395               | 0.534649  | -0.000016 |
| 2             | 6             | 0           | -4.093151               | 1.769325  | 0.000009  |
| 3             | 6             | 0           | -2.701030               | 1.768454  | 0.000027  |
| 4             | 6             | 0           | -1.993837               | 0.563171  | 0.000020  |
| 5             | 6             | 0           | -2.713812               | -0.647993 | -0.000005 |
| 6             | 6             | 0           | -4.109270               | -0.700725 | -0.000023 |
| 7             | 6             | 0           | -4.877312               | 3.056859  | 0.000016  |
| 8             | 6             | 0           | -4.880865               | -1.997080 | -0.000050 |
| 9             | 7             | 0           | -0.607583               | 0.447187  | 0.000039  |
| 10            | 6             | 0           | -0.252306               | -0.794194 | 0.000027  |
| 11            | 16            | 0           | -1.574662               | -1.997280 | -0.000010 |
| 12            | 8             | 0           | -6.147255               | 0.605371  | -0.000032 |
| 13            | 7             | 0           | 1.033971                | -1.272778 | 0.000047  |
| 14            | 7             | 0           | 2.088894                | -0.424904 | 0.000019  |
| 15            | 1             | 0           | -6.532004               | -0.278308 | -0.000049 |
| 16            | 1             | 0           | 1.176014                | -2.276127 | 0.000035  |
| 17            | 6             | 0           | 3.277495                | -0.931572 | 0.000023  |
| 18            | 6             | 0           | 3.559744                | -2.409354 | 0.000056  |
| 19            | 6             | 0           | 4.403121                | 0.042661  | -0.000000 |
| 20            | 6             | 0           | 4.171891                | 1.429417  | 0.000025  |
| 21            | 6             | 0           | 5.256198                | 2.293342  | 0.000001  |
| 22            | 6             | 0           | 6.547263                | 1.763083  | -0.000047 |
| 23            | 6             | 0           | 6.683685                | 0.379209  | -0.000067 |

|    |   |   |           |           |           |
|----|---|---|-----------|-----------|-----------|
| 24 | 7 | 0 | 5.646660  | -0.466380 | -0.000044 |
| 25 | 1 | 0 | -2.156448 | 2.705933  | 0.000046  |
| 26 | 1 | 0 | -4.205476 | 3.916434  | 0.000040  |
| 27 | 1 | 0 | -5.526345 | 3.127794  | -0.877925 |
| 28 | 1 | 0 | -5.526375 | 3.127767  | 0.877936  |
| 29 | 1 | 0 | -4.213808 | -2.859246 | -0.000062 |
| 30 | 1 | 0 | -5.520342 | -2.087387 | -0.885221 |
| 31 | 1 | 0 | -5.520351 | -2.087418 | 0.885112  |
| 32 | 1 | 0 | 4.630878  | -2.588195 | 0.000031  |
| 33 | 1 | 0 | 3.128482  | -2.890267 | -0.885240 |
| 34 | 1 | 0 | 3.128529  | -2.890215 | 0.885403  |
| 35 | 1 | 0 | 3.157764  | 1.803705  | 0.000063  |
| 36 | 1 | 0 | 5.099734  | 3.365980  | 0.000020  |
| 37 | 1 | 0 | 7.422201  | 2.401225  | -0.000066 |
| 38 | 1 | 0 | 7.670066  | -0.075562 | -0.000104 |

**Data 32:** Cartesian coordinates and energies of the optimized geometry for (*E,Z*)-**HL**<sup>1c'</sup> (DMSO solution).

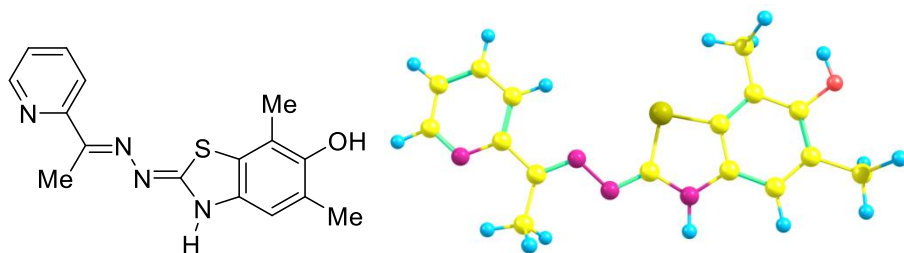

|                                               |                             |
|-----------------------------------------------|-----------------------------|
| Electronic Energy =                           | -1312.03026828 a.u.         |
| Zero-point correction =                       | 0.294120 (Hartree/Particle) |
| Thermal correction to Energy =                | 0.315330                    |
| Thermal correction to Enthalpy =              | 0.316275                    |
| Thermal correction to Gibbs Free Energy =     | 0.241220                    |
| Sum of electronic and zero-point Energies =   | -1311.736149                |
| Sum of electronic and thermal Energies =      | -1311.714938                |
| Sum of electronic and thermal Enthalpies =    | -1311.713994                |
| Sum of electronic and thermal Free Energies = | -1311.789049                |

Standard orientation:

| Center Number | Atomic Number | Atomic Type | Coordinates (Angstroms) |           |           |
|---------------|---------------|-------------|-------------------------|-----------|-----------|
|               |               |             | X                       | Y         | Z         |
| 1             | 6             | 0           | 4.643360                | 0.745229  | -0.001618 |
| 2             | 6             | 0           | 4.905944                | -0.636294 | 0.000197  |
| 3             | 6             | 0           | 3.830575                | -1.525793 | 0.000897  |
| 4             | 6             | 0           | 2.531772                | -1.028976 | 0.000114  |
| 5             | 6             | 0           | 2.295064                | 0.348496  | -0.002231 |
| 6             | 6             | 0           | 3.341301                | 1.271991  | -0.004409 |
| 7             | 6             | 0           | 6.328818                | -1.132585 | 0.001838  |
| 8             | 6             | 0           | 3.109218                | 2.762076  | -0.005206 |
| 9             | 7             | 0           | 1.350249                | -1.771151 | 0.000863  |
| 10            | 6             | 0           | 0.192676                | -1.058499 | 0.000271  |
| 11            | 16            | 0           | 0.547148                | 0.693265  | -0.001588 |
| 12            | 8             | 0           | 5.745256                | 1.568370  | 0.000729  |
| 13            | 7             | 0           | -0.984243               | -1.606206 | 0.001715  |
| 14            | 7             | 0           | -1.988757               | -0.668028 | 0.001023  |
| 15            | 1             | 0           | 5.476690                | 2.493937  | -0.004168 |
| 16            | 6             | 0           | -3.197608               | -1.129597 | 0.002832  |
| 17            | 6             | 0           | -3.525509               | -2.597665 | 0.005425  |
| 18            | 6             | 0           | -4.291036               | -0.119574 | 0.001660  |
| 19            | 6             | 0           | -4.014160               | 1.259916  | 0.014818  |
| 20            | 6             | 0           | -5.066559               | 2.162082  | 0.012630  |

|    |   |   |           |           |           |
|----|---|---|-----------|-----------|-----------|
| 21 | 6 | 0 | -6.375817 | 1.678203  | -0.002625 |
| 22 | 6 | 0 | -6.559843 | 0.299834  | -0.014745 |
| 23 | 7 | 0 | -5.554087 | -0.582535 | -0.012562 |
| 24 | 1 | 0 | 4.010449  | -2.594727 | 0.002240  |
| 25 | 1 | 0 | 6.357656  | -2.223084 | 0.000961  |
| 26 | 1 | 0 | 6.875319  | -0.773202 | -0.875074 |
| 27 | 1 | 0 | 6.872814  | -0.774802 | 0.880987  |
| 28 | 1 | 0 | 2.047929  | 3.002315  | -0.070389 |
| 29 | 1 | 0 | 3.597955  | 3.246520  | -0.857684 |
| 30 | 1 | 0 | 3.489607  | 3.230291  | 0.909333  |
| 31 | 1 | 0 | -4.600825 | -2.751691 | 0.018812  |
| 32 | 1 | 0 | -3.074481 | -3.082211 | 0.875697  |
| 33 | 1 | 0 | -3.098717 | -3.080585 | -0.878171 |
| 34 | 1 | 0 | -2.987006 | 1.596352  | 0.026655  |
| 35 | 1 | 0 | -4.872162 | 3.228589  | 0.022910  |
| 36 | 1 | 0 | -7.227966 | 2.346588  | -0.004746 |
| 37 | 1 | 0 | -7.561975 | -0.119503 | -0.026697 |
| 38 | 1 | 0 | 1.326992  | -2.781612 | 0.002548  |

**Data 33:** Cartesian coordinates and energies of the optimized geometry for (*E,E*)-**HL**<sup>1c'</sup> (DMSO solution).

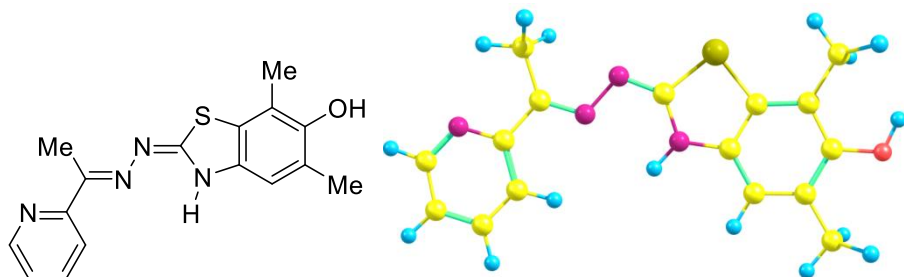

|                                               |                             |
|-----------------------------------------------|-----------------------------|
| Electronic Energy =                           | -1312.02751003 a.u.         |
| Zero-point correction =                       | 0.294159 (Hartree/Particle) |
| Thermal correction to Energy =                | 0.315299                    |
| Thermal correction to Enthalpy =              | 0.316243                    |
| Thermal correction to Gibbs Free Energy =     | 0.241616                    |
| Sum of electronic and zero-point Energies =   | -1311.733351                |
| Sum of electronic and thermal Energies =      | -1311.712212                |
| Sum of electronic and thermal Enthalpies =    | -1311.711267                |
| Sum of electronic and thermal Free Energies = | -1311.785894                |

Standard orientation:

| Center Number | Atomic Number | Atomic Type | Coordinates (Angstroms) |           |           |
|---------------|---------------|-------------|-------------------------|-----------|-----------|
|               |               |             | X                       | Y         | Z         |
| 1             | 6             | 0           | 4.658551                | 0.611942  | 0.007697  |
| 2             | 6             | 0           | 3.920983                | 1.809087  | 0.018823  |
| 3             | 6             | 0           | 2.526579                | 1.742170  | 0.017983  |
| 4             | 6             | 0           | 1.899657                | 0.501136  | 0.006269  |
| 5             | 6             | 0           | 2.657144                | -0.674749 | -0.004332 |
| 6             | 6             | 0           | 4.051553                | -0.654700 | -0.003924 |
| 7             | 6             | 0           | 4.637478                | 3.134689  | 0.031350  |
| 8             | 6             | 0           | 4.882362                | -1.912756 | -0.015757 |
| 9             | 7             | 0           | 0.527604                | 0.249067  | 0.004128  |
| 10            | 6             | 0           | 0.157803                | -1.059971 | -0.008165 |
| 11            | 16            | 0           | 1.593569                | -2.100899 | -0.017085 |
| 12            | 8             | 0           | 6.027148                | 0.745900  | 0.008730  |
| 13            | 7             | 0           | -1.039327               | -1.573132 | -0.013252 |
| 14            | 7             | 0           | -2.009061               | -0.588618 | -0.012030 |
| 15            | 1             | 0           | 6.452937                | -0.118787 | 0.000783  |

|    |   |   |           |           |           |
|----|---|---|-----------|-----------|-----------|
| 16 | 6 | 0 | -3.232586 | -1.010475 | -0.001348 |
| 17 | 6 | 0 | -3.609407 | -2.466717 | 0.014265  |
| 18 | 6 | 0 | -4.294394 | 0.033707  | -0.003877 |
| 19 | 6 | 0 | -3.978053 | 1.402496  | -0.078658 |
| 20 | 6 | 0 | -5.002389 | 2.336569  | -0.075588 |
| 21 | 6 | 0 | -6.323899 | 1.894446  | 0.001839  |
| 22 | 6 | 0 | -6.548149 | 0.523641  | 0.071254  |
| 23 | 7 | 0 | -5.569717 | -0.388662 | 0.068252  |
| 24 | 1 | 0 | 1.940033  | 2.653638  | 0.026359  |
| 25 | 1 | 0 | 3.923723  | 3.959584  | 0.040392  |
| 26 | 1 | 0 | 5.282780  | 3.228428  | 0.909712  |
| 27 | 1 | 0 | 5.280936  | 3.246134  | -0.846314 |
| 28 | 1 | 0 | 4.257833  | -2.806298 | -0.018968 |
| 29 | 1 | 0 | 5.528623  | -1.977588 | 0.866388  |
| 30 | 1 | 0 | 5.521195  | -1.965630 | -0.904102 |
| 31 | 1 | 0 | -4.689273 | -2.585273 | 0.006881  |
| 32 | 1 | 0 | -3.195250 | -2.953949 | 0.901442  |
| 33 | 1 | 0 | -3.176711 | -2.975583 | -0.851273 |
| 34 | 1 | 0 | -2.943167 | 1.707932  | -0.139239 |
| 35 | 1 | 0 | -4.776732 | 3.395348  | -0.133597 |
| 36 | 1 | 0 | -7.155196 | 2.588576  | 0.006835  |
| 37 | 1 | 0 | -7.561276 | 0.136152  | 0.131880  |
| 38 | 1 | 0 | -0.190635 | 0.960826  | 0.009656  |

**Data 34:** Cartesian coordinates and energies of the optimized geometry for the *s-cis*-conformer (around the exocyclic C-N bond) of (Z)-**HL**<sup>1c'</sup> (DMSO solution).

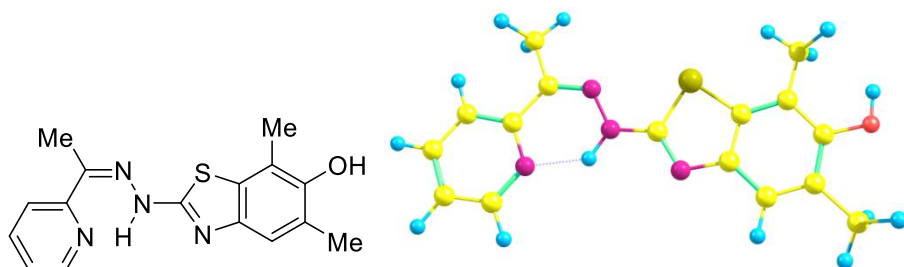

|                                               |                             |
|-----------------------------------------------|-----------------------------|
| Electronic Energy =                           | -1312.03479280 a.u.         |
| Zero-point correction =                       | 0.294827 (Hartree/Particle) |
| Thermal correction to Energy =                | 0.315436                    |
| Thermal correction to Enthalpy =              | 0.316380                    |
| Thermal correction to Gibbs Free Energy =     | 0.244300                    |
| Sum of electronic and zero-point Energies =   | -1311.739966                |
| Sum of electronic and thermal Energies =      | -1311.719357                |
| Sum of electronic and thermal Enthalpies =    | -1311.718413                |
| Sum of electronic and thermal Free Energies = | -1311.790493                |

Standard orientation:

| Center Number | Atomic Number | Atomic Type | Coordinates (Angstroms) |           |           |
|---------------|---------------|-------------|-------------------------|-----------|-----------|
|               |               |             | X                       | Y         | Z         |
| 1             | 6             | 0           | 4.742819                | -0.063880 | 0.000896  |
| 2             | 6             | 0           | 4.437850                | -1.440095 | -0.000881 |
| 3             | 6             | 0           | 3.101570                | -1.830961 | -0.002471 |
| 4             | 6             | 0           | 2.083984                | -0.872524 | -0.002245 |
| 5             | 6             | 0           | 2.431485                | 0.493239  | -0.000755 |
| 6             | 6             | 0           | 3.757030                | 0.933927  | -0.000034 |
| 7             | 6             | 0           | 5.552425                | -2.455591 | -0.000477 |
| 8             | 6             | 0           | 4.131464                | 2.395632  | 0.004540  |
| 9             | 7             | 0           | 0.721307                | -1.147749 | -0.003756 |
| 10            | 6             | 0           | 0.034099                | -0.048407 | -0.003020 |
| 11            | 16            | 0           | 0.959008                | 1.473975  | -0.000138 |

|    |   |   |           |           |           |
|----|---|---|-----------|-----------|-----------|
| 12 | 8 | 0 | 6.082186  | 0.255059  | 0.004940  |
| 13 | 7 | 0 | -1.328421 | -0.010517 | -0.003369 |
| 14 | 7 | 0 | -1.953058 | 1.184649  | -0.003110 |
| 15 | 1 | 0 | 6.202848  | 1.211218  | 0.001762  |
| 16 | 1 | 0 | -1.899293 | -0.866465 | -0.002294 |
| 17 | 6 | 0 | -3.248322 | 1.270639  | -0.001886 |
| 18 | 6 | 0 | -3.788691 | 2.680160  | -0.002165 |
| 19 | 6 | 0 | -4.208616 | 0.141369  | -0.000128 |
| 20 | 6 | 0 | -5.594577 | 0.376561  | 0.001432  |
| 21 | 6 | 0 | -6.469702 | -0.702254 | 0.003506  |
| 22 | 6 | 0 | -5.954955 | -1.996255 | 0.003981  |
| 23 | 6 | 0 | -4.571891 | -2.149994 | 0.002253  |
| 24 | 7 | 0 | -3.721483 | -1.120888 | 0.000241  |
| 25 | 1 | 0 | 2.843377  | -2.884106 | -0.003848 |
| 26 | 1 | 0 | 5.148713  | -3.469223 | -0.003521 |
| 27 | 1 | 0 | 6.197500  | -2.340087 | -0.876680 |
| 28 | 1 | 0 | 6.193467  | -2.343880 | 0.879195  |
| 29 | 1 | 0 | 3.249084  | 3.033593  | -0.047545 |
| 30 | 1 | 0 | 4.762983  | 2.655758  | -0.852256 |
| 31 | 1 | 0 | 4.674307  | 2.671855  | 0.915382  |
| 32 | 1 | 0 | -4.407104 | 2.873687  | -0.883932 |
| 33 | 1 | 0 | -2.956754 | 3.382647  | -0.003413 |
| 34 | 1 | 0 | -4.405382 | 2.874748  | 0.880570  |
| 35 | 1 | 0 | -5.982968 | 1.384918  | 0.001076  |
| 36 | 1 | 0 | -7.540107 | -0.533509 | 0.004760  |
| 37 | 1 | 0 | -6.601959 | -2.864185 | 0.005623  |
| 38 | 1 | 0 | -4.124572 | -3.138910 | 0.002497  |

**Data 35:** Cartesian coordinates and energies of the optimized geometry for the *s-trans*-conformer (around the exocyclic C-N bond) of (*Z*)-**HL**<sup>1c'</sup> (DMSO solution).

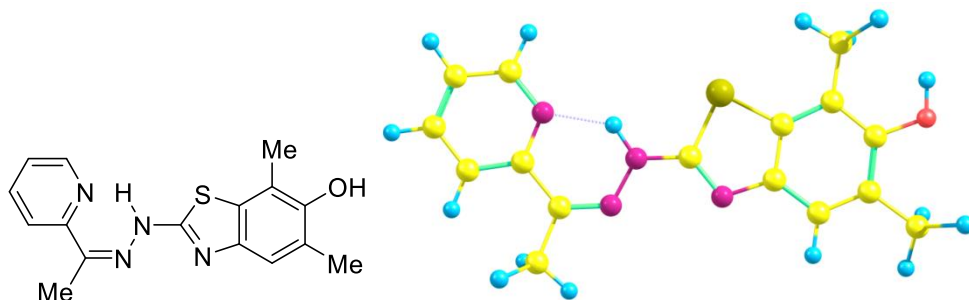

|                                               |                             |
|-----------------------------------------------|-----------------------------|
| Electronic Energy =                           | -1312.03016376 a.u.         |
| Zero-point correction =                       | 0.294962 (Hartree/Particle) |
| Thermal correction to Energy =                | 0.315536                    |
| Thermal correction to Enthalpy =              | 0.316480                    |
| Thermal correction to Gibbs Free Energy =     | 0.244493                    |
| Sum of electronic and zero-point Energies =   | -1311.735201                |
| Sum of electronic and thermal Energies =      | -1311.714628                |
| Sum of electronic and thermal Enthalpies =    | -1311.713683                |
| Sum of electronic and thermal Free Energies = | -1311.785671                |

Standard orientation:

| Center Number | Atomic Number | Atomic Type | Coordinates (Angstroms) |           |           |
|---------------|---------------|-------------|-------------------------|-----------|-----------|
|               |               |             | X                       | Y         | Z         |
| 1             | 6             | 0           | -4.733494               | -0.290988 | -0.000004 |
| 2             | 6             | 0           | -4.578378               | 1.109876  | 0.000015  |
| 3             | 6             | 0           | -3.291785               | 1.642004  | 0.000025  |



|    |    |   |           |           |           |
|----|----|---|-----------|-----------|-----------|
| 4  | 6  | 0 | -2.176045 | 0.800313  | 0.000015  |
| 5  | 6  | 0 | -2.376888 | -0.594843 | -0.000005 |
| 6  | 6  | 0 | -3.646287 | -1.177359 | -0.000012 |
| 7  | 6  | 0 | -5.795151 | 2.000205  | 0.000025  |
| 8  | 6  | 0 | -3.862057 | -2.670814 | -0.000023 |
| 9  | 7  | 0 | -0.852632 | 1.226191  | 0.000026  |
| 10 | 6  | 0 | -0.043895 | 0.216794  | 0.000011  |
| 11 | 16 | 0 | -0.806999 | -1.402796 | -0.000016 |
| 12 | 8  | 0 | -6.029973 | -0.753093 | -0.000005 |
| 13 | 7  | 0 | 1.322393  | 0.253152  | 0.000020  |
| 14 | 7  | 0 | 1.970252  | 1.440459  | -0.000015 |
| 15 | 1  | 0 | -6.045391 | -1.716606 | -0.000082 |
| 16 | 1  | 0 | 1.897585  | -0.599748 | 0.000014  |
| 17 | 6  | 0 | 3.267976  | 1.486287  | -0.000024 |
| 18 | 6  | 0 | 3.847897  | 2.880747  | -0.000058 |
| 19 | 6  | 0 | 4.202768  | 0.334274  | -0.000004 |
| 20 | 6  | 0 | 5.593900  | 0.536475  | 0.000014  |
| 21 | 6  | 0 | 6.443672  | -0.562476 | 0.000030  |
| 22 | 6  | 0 | 5.899095  | -1.844164 | 0.000025  |
| 23 | 6  | 0 | 4.512944  | -1.965765 | 0.000007  |
| 24 | 7  | 0 | 3.687156  | -0.916761 | -0.000006 |
| 25 | 1  | 0 | -3.147899 | 2.716633  | 0.000040  |
| 26 | 1  | 0 | -5.502355 | 3.051215  | 0.000012  |
| 27 | 1  | 0 | -6.422283 | 1.818604  | -0.877974 |
| 28 | 1  | 0 | -6.422258 | 1.818620  | 0.878045  |
| 29 | 1  | 0 | -2.914844 | -3.210280 | -0.000022 |
| 30 | 1  | 0 | -4.417733 | -3.000366 | -0.885119 |
| 31 | 1  | 0 | -4.417743 | -3.000374 | 0.885065  |
| 32 | 1  | 0 | 4.470599  | 3.057969  | 0.882189  |
| 33 | 1  | 0 | 3.035318  | 3.605398  | -0.000097 |
| 34 | 1  | 0 | 4.470635  | 3.057911  | -0.882291 |
| 35 | 1  | 0 | 6.006135  | 1.535246  | 0.000017  |
| 36 | 1  | 0 | 7.517711  | -0.418691 | 0.000045  |
| 37 | 1  | 0 | 6.525857  | -2.726814 | 0.000036  |
| 38 | 1  | 0 | 4.042624  | -2.943913 | 0.000004  |

-----

## References

- <sup>1</sup> Kabsch, W. *XDS. Acta Crystallogr D Biol Crystallogr* **2010**, *66* (2), 125–132. <https://doi.org/10.1107/S0907444909047337>.
- <sup>2</sup> Sheldrick, G. M. A Short History of *SHELX*. *Acta Crystallogr A Found Crystallogr* **2008**, *64* (1), 112–122. <https://doi.org/10.1107/S0108767307043930>.
- Zékány L.; Nagypál I. In *Computational Methods for the Determination of Stability Constants*; Plenum Press: New York, NY, 1985; pp 291–353.
- Irving, H. M.; Miles, M. G.; Pettit, L. D. A Study of Some Problems in Determining the Stoichiometric Proton Dissociation Constants of Complexes by Potentiometric Titrations Using a Glass Electrode. *Analyt. Chim. Acta* **1967**, *38*, 475–488.
- Enyedy, É. A.; Zsigó, É.; Nagy, N. V.; Kowol, C. R.; Roller, A.; Keppler, B. K.; Kiss, T. Complex-Formation Ability of Salicylaldehyde Thiosemicarbazone towards Zn(II), Cu (II), Fe(II), Fe(III) and Ga(III) Ions. *Eur. J. Inorg. Chem.* **2012**, 4036–4047.

- 
6. Hager, S.; Pape, V. F. S.; Pósa, V.; Montsch, B.; Uhlik, L.; Szakács, G.; Tóth, S.; Jabronka, N.; Keppler, B. K.; Kowol, C. R.; Enyedy, E. A.; Heffeter, P. High Copper Complex Stability and Slow Reduction Kinetics as Key Parameters for Improved Activity, Paraptosis Induction and Impact on Drug-Resistant Cells of Anticancer Thiosemicarbazones. *Antioxid.Redox Signal.* **2020**, *33*, 395-414.
7. Petrasheuskaya, T. V.; Kiss, M. A.; Dömötör, O.; Holczbauer, T.; May, N. V.; Spengler, G.; Kincses, A.; Čipak Gašparović, A.; Frank, É.; Enyedy, É. A. Salicylaldehyde Thiosemicarbazone Copper Complexes: Impact of Hybridization with Estrone on Cytotoxicity, Solution Stability and Redox Activity. *New J. Chem.* **2020**, *44*, 12154–12168.
8. Kowol, C. R.; Nagy, N. V.; Jakusch, T.; Roller, A.; Heffeter, P.; Keppler, B. K.; Enyedy, É. A. Vanadium(IV/V) Complexes of Triapine and Related Thiosemicarbazones: Synthesis, Solution Equilibrium and Bioactivity. *J. Inorg. Biochem.* **2015**, *152*, 62–73.
9. Aranzaes, J. R.; Daniel, M. C.; Astruc, D. Metallocenes as References for the Determination of Redox Potentials by Cyclic Voltammetry. Permethylated Iron and Cobalt Sandwich Complexes, Inhibition by Polyamine Dendrimers, and the Role of Hydroxy-Containing Ferrocenes. *Can. J. Chem.* **2006**, *84*, 288–299.
10. *GraphPad Software I, GraphPad Prism*; GraphPad Software, Inc., 2007.
11. Mucsi, I.; Varga, A.; Kawase, M.; Motohashi, N.; Molnar, J. Interaction between various resistance modifiers and apoptosis inducer 12H-benzo[alpha]phenothiazine. *Anticancer Res.*, 2002, *22*, 2833–2836.
12. Ohui, K.; Afanasenko, E.; Bacher, F.; Ting, R. L. X.; Zafar, A.; Blanco-Cabra, N.; Torrents, E.; Dömötör, O.; May, N. V.; Darvasiova, D.; Enyedy, É. A.; Popović-Bijelić, A.; Reynisson, J.; Rapta, P.; Babak, M. V.; Pastorin, G.; Arion, V. B. New Water-Soluble Copper(II) Complexes with Morpholine–Thiosemicarbazone Hybrids: Insights into the Anticancer and Antibacterial Mode of Action. *J. Med. Chem.* **2019**, *62*, 512–530.
13. Popović-Bijelić, A.; Kowol, C. R.; Lind, M. E. S.; Luo, J.; Himo, F.; Enyedy, É. A.; Arion, V. B.; Gräslund, A. Ribonucleotide Reductase Inhibition by Metal Complexes of Triapine (3-Aminopyridine-2-Carboxaldehyde Thiosemicarbazone): A Combined Experimental and Theoretical Study. *J. Inorg. Biochem.* **2011**, *105*, 1422–1431.
14. Zaltariov, M. F.; Hammerstad, M.; Arabshahi, H. J.; Jovanović, K.; Richter, K. W.; Cazacu, M.; Shova, S.; Balan, M.; Andersen, N. H.; Radulović, S.; Reynisson, J.; Andersson, K. K.; Arion, V. B. New Iminodiacetate–Thiosemicarbazone Hybrids and Their Copper(II) Complexes Are Potential

---

Ribonucleotide Reductase R2 Inhibitors with High Antiproliferative Activity. *Inorg. Chem.* **2017**, *56*, 3532–3549.

15. Becke, A. D. Density-functional thermochemistry. III. The role of exact exchange. *J. Chem. Phys.* **1993**, *98*, 5648–5652.

16. *Gaussian 16, Revision A.03*, M. J. Frisch, G. W. Trucks, H. B. Schlegel, G. E. Scuseria, M. A. Robb, J. R. Cheeseman, G. Scalmani, V. Barone, G. A. Petersson, H. Nakatsuji, X. Li, M. Caricato, A. V. Marenich, J. Bloino, B. G. Janesko, R. Gomperts, B. Mennucci, H. P. Hratchian, J. V. Ortiz, A. F. Izmaylov, J. L. Sonnenberg, D. Williams-Young, F. Ding, F. Lipparini, F. Egidi, J. Goings, B. Peng, A. Petrone, T. Henderson, D. Ranasinghe, V. G. Zakrzewski, J. Gao, N. Rega, G. Zheng, W. Liang, M. Hada, M. Ehara, K. Toyota, R. Fukuda, J. Hasegawa, M. Ishida, T. Nakajima, Y. Honda, O. Kitao, H. Nakai, T. Vreven, K. Throssell, J. A. Montgomery, Jr., J. E. Peralta, F. Ogliaro, M. J. Bearpark, J. J. Heyd, E. N. Brothers, K. N. Kudin, V. N. Staroverov, T. A. Keith, R. Kobayashi, J. Normand, K. Raghavachari, A. P. Rendell, J. C. Burant, S. S. Iyengar, J. Tomasi, M. Cossi, J. M. Millam, M. Klene, C. Adamo, R. Cammi, J. W. Ochterski, R. L. Martin, K. Morokuma, O. Farkas, J. B. Foresman, and D. J. Fox, Gaussian, Inc., Wallingford CT, 2016.

17. Varetto, U., Molekel 5.4.0.8, Swiss National Supercomputing Centre, Lugano, Switzerland, 2009.

18. Hoggarth, E.; Young, E. H. P. Compounds related to thiosemicarbazide, Part VII. Benzylthiosemicarbazides *J. Chem. Soc.* **1950**, 1582–1584.

19. Schantl, J. G.; Hebeisen, P.; Minach, L.  $\alpha$ -Arylazoalkyl Isocyanates and Isothiocyanates by Potassium Permanganate Oxidation of 2,5,5-Trisubstituted 1,2,4-Triazolidin-3-ones and 1,2,4-Triazolidin-3-thiones *Synthesis* **1984**, 1984, 315–317.

20. Abdou, W. M.; Salem, M. A. I.; Sediek, A. A. Cyclic oxyphosphoranes in synthesis. A novel synthesis of oxathiaphospholenes, fused pyrimidines and aminoxyphosphoranes *Arkivoc* **2005**, xiv, 102–117.

21. Gribble, G.W. Indole Ring Synthesis: From Natural Products to Drug Discovery, *John Wiley & Sons, Ltd. Published 2016*.

22. Tokuyama, H.; Yamashita, T.; Reding, M. T.; Kaburagi, Y.; Fukuyama, T. Radical Cyclization of 2-Alkenylthioanilides: A Novel Synthesis of 2,3-Disubstituted Indoles *J. Am. Chem. Soc.* **1999**, *121*, 3791–3792.

23. Kowol, C. R.; Nagy, N. V.; Jakusch, T.; Roller, A.; Heffeter, P.; Keppler, B. K.; Enyedy, É. A. Vanadium(IV/V) Complexes of Triapine and Related Thiosemicarbazones: Synthesis, Solution Equilibrium and Bioactivity. *J. Inorg. Biochem.* **2015**, *152*, 62–73.
